# Supplementary material for: Interpretable machining learning assisted insights into bifunctional squaramide catalyzed ring-opening polymerization of lactide
Source: Royal Society of Chemistry journal article supplement (doi:10.1039/d4py00866a), 2024-01-01
Supplement: d4py00866a1.pdf [file d4py00866a1.pdf]

# Supporting Information

## Interpretable Machine Learning Assisted Insight into Bifunctional Squaramide Catalyzed Ring-opening Polymerization of Lactide

Shaoju Cao<sup>1</sup>, Mengting Hong<sup>1</sup>, Junyuan Hu<sup>2</sup>, Zhenjiang Li<sup>1,\*</sup>, Jin Huang<sup>1,\*</sup>, and Kai Guo<sup>1</sup>

<sup>1</sup> State Key Laboratory of Materials-Oriented Chemical Engineering, College of Biotechnology and Pharmaceutical Engineering, Nanjing Tech University, 30 Puzhu Road South, Nanjing 211816, China

<sup>2</sup> Institute of Advanced Synthesis, School of Chemistry and Molecular Engineering, Jiangsu National Synergetic Innovation Center for Advanced Materials, Nanjing Tech University, 30 Puzhu Road South, Nanjing 211816, China.

### Table of Contents

|                                      |           |
|--------------------------------------|-----------|
| <b>Table of Contents</b> .....       | <b>1</b>  |
| <b>Materials</b> .....               | <b>2</b>  |
| <b>Instruments</b> .....             | <b>2</b>  |
| <b>Experimental Procedures</b> ..... | <b>3</b>  |
| <b>Supporting Tables</b> .....       | <b>9</b>  |
| <b>Supporting Figures</b> .....      | <b>13</b> |
| <b>Computational Methods</b> .....   | <b>38</b> |

## Materials

L-Lactide (L-LA; 99.5%) was purchased from Jinan Daigang Biomaterial Co. and purified by recrystallization from anhydrous toluene and dried under vacuum overnight (40 °C). Dichloromethane (>99.5%, Sinopharm Chemical Reagent Co.) was distilled over CaH<sub>2</sub> in an argon environment, and further dried over 4 Å molecular sieve pellets for 48 h before use. Tetrahydrofuran (THF; HPLC, Aldrich), 3-phenylpropanol (PPA) were dried and stored over 4 Å molecular sieves under an inert atmosphere. Pentaerythritol was dried over P<sub>2</sub>O<sub>5</sub> in a vacuum before use. Ethanol (EtOH) was purchased from Sinopharm Chemical Reagent Co. Sodium hydroxide(NaOH), Lithium hydroxide(LiOH), Potassium hydroxide(KOH) and Cesium hydroxide(CsOH) were purchased from Sinopharm Chemical Reagent Co. Aniline, Benzylamine, 3,5-bis(trifluoromethyl)aniline, 4-tert-Butylaniline, Cyclohexylamine, Butylamine and tert-Butylamine were purchased from J&K Scientific Ltd. Diethyl squarate was purchased from J&K Scientific Ltd. Glycine(Gly), L-Alanine(L-Ala), L-Valine(L-Vla), L-Isoleucine(L-Ile), β-Alanine, 4-Aminobutyric acid, 5-Aminovaleric acid, 6-Aminocaproic acid, 7-Aminoheptanoic acid, 8-Aminooctanoic acid, 9-azanylnonanoic acid, 10-Aminodecanoic acid, 11-Aminoundecanoic acid and 12-Aminododecanoic acid were purchased from Diba Biotechnology Co. 12-Crown-4, 15-Crown-5 and 18-Crown-6 were purchased from Maclean's Biochemical Technology Co.

## Instruments

<sup>1</sup>H NMR (400 MHz) and <sup>13</sup>C NMR (100 MHz) spectra were measured using deuterated chloroform (CDCl<sub>3</sub>) as solvent on a Bruker AVANCE Ultrashield Plus spectrometer at 298K. Positive-ion MALDI Time-Of-Flight Mass Spectrometry (MALDI-TOF-MS) was performed on a Bruker Co. Ultrafiltrate mass spectrometer equipped with a Smartbeam/Smartbeam II modified laser (Nd: YAG) at 25 kV acceleration voltage. The polymer sample was dissolved in CHCl<sub>3</sub> at a concentration of 1 mg·mL<sup>-1</sup> with the addition of 50 μL of 2 mg·L<sup>-1</sup> sodium iodide (NaI). 2,5-dihydroxybenzoic acid (DHB) was applied as a matrix and 1 μL of 40 mg·mL<sup>-1</sup> solution was dropped to a stainless-steel target and air-dried. After the crystallization of DHB, the 1 μL of the polymer solution was dropped on the crystal and air-dried. Size Exclusion Chromatography (SEC) was performed in tetrahydrofuran (THF) at room temperature at a flow rate of 0.7 mL min<sup>-1</sup> using an SSI 1500 pump equipped with a Waters column (5 μm, 300 mm × 7.8 mm), and a Wyatt Optilab rEX differential refractive index (DRI) detector with a 658 nm light source. All SEC data were analyzed using Wyatt Astra V 6.1.1 software. The molecular weight distribution (*D*) was determined by a calibration with standard polystyrene samples.

## Experimental Procedures

### Preparation of the squaramide catalysts

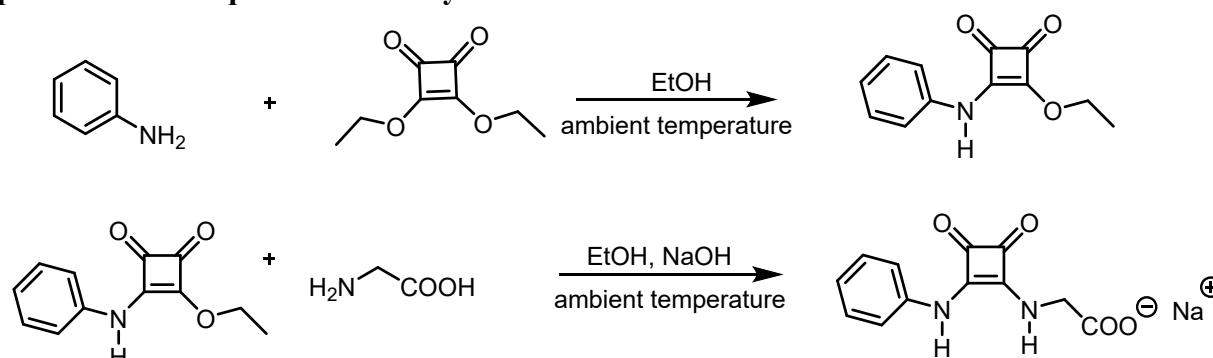

**Scheme S1.** Synthesis of squaramide catalysts at ambient temperature

Square amide alkali metal carboxylate catalysts are synthesized by a two-step amine substitution reaction. Taking synthesis of 01 as an example. Aniline (0.93 g, 10 mmol, 1.0 equiv.) and diethyl squarate (1.7 g, 10 mmol, 1.0 equiv.) were added to a 50 mL vial and stirred using magnetic stir bar with ethanol as a solvent (20 mL) for 24 h at ambient temperature. The solvent was removed under vacuum to yield the single substituted product. Afterward, glycine (0.45 g, 5 mmol, 1.0 equiv.) and 1.0 M NaOH (5 mL) were added to a 25 mL flask at room temperature. After 8 h, 7.5 mL of ethanol was added to solubilize the single substituted product (1.1 g, 5 mmol, 1.0 equiv.). The reaction was quenched after 4 h and ethanol was removed under vacuum and dried for 24 h to yield 01 (yield = 80%. White powder.).

#### Catalyst 01

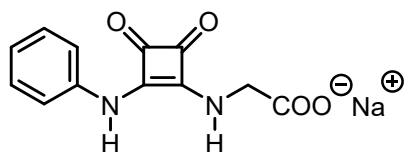

**Catalyst 01** 1.24 g; yield = 80%. White powder. <sup>1</sup>H NMR (400 MHz, DMSO-*d*<sub>6</sub>) δ 12.29 (s, 1H), 8.78 (s, 1H), 7.97 (d, *J* = 8.0 Hz, 2H), 7.25 (t, *J* = 7.9 Hz, 2H), 6.93 (t, *J* = 7.3 Hz, 1H), 4.08 (d, *J* = 4.6 Hz, 2H). <sup>13</sup>C NMR (101 MHz, DMSO-*d*<sub>6</sub>) δ 184.32, 180.31, 170.38, 168.31, 140.37, 128.75, 121.76, 118.72, 48.06, 39.52. Chemical Formula: C<sub>12</sub>H<sub>9</sub>N<sub>2</sub>NaO<sub>4</sub>.

#### Catalyst 02

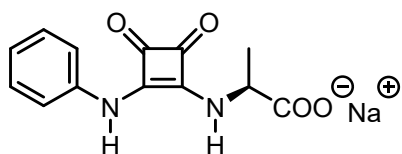

**Catalyst 02** 1.16 g; yield = 75%. Yellow powder. <sup>1</sup>H NMR (400 MHz, DMSO-*d*<sub>6</sub>) δ 12.49 (s, 1H), 9.19 (s, 1H), 7.94 (s, 2H), 7.23 (t, *J* = 7.6 Hz, 2H), 6.91 (t, *J* = 7.4 Hz, 1H), 4.40 (q, *J* = 7.0 Hz, 1H), 1.36 (d, *J* = 7.0 Hz, 3H). Chemical Formula: C<sub>13</sub>H<sub>11</sub>N<sub>2</sub>NaO<sub>4</sub>.

#### Catalyst 03

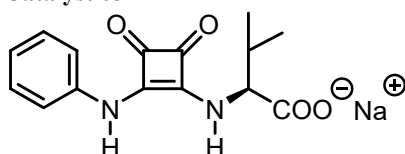

**Catalyst 02** 1.25 g; yield = 81%. Light yellow powder. <sup>1</sup>H NMR (400 MHz, DMSO-*d*<sub>6</sub>) δ 12.48 (s, 1H), 9.02 (s, 1H), 7.99 (d, *J* = 7.8 Hz, 2H), 7.31 – 7.20 (m, 2H), 6.93 (t, *J* = 7.3 Hz, 1H), 4.38 (dd, *J* = 9.4, 5.4 Hz, 1H), 2.08 (dq, *J* = 13.7, 6.7 Hz, 1H), 0.91 (dd, *J* = 9.8, 6.8 Hz, 6H). <sup>13</sup>C NMR (101 MHz, DMSO-*d*<sub>6</sub>) δ 183.80, 180.19, 172.65, 168.85, 163.69, 128.84, 121.73, 118.52, 32.46, 19.12, 17.78. Chemical Formula: C<sub>14</sub>H<sub>12</sub>N<sub>2</sub>NaO<sub>4</sub>.

#### Catalyst 04

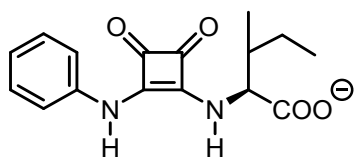

**Catalyst 04** 1.3 g; yield = 81%. Yellow powder.  $^1\text{H NMR}$  (400 MHz,  $\text{DMSO-}d_6$ )  $\delta$  12.78 (s, 1H), 9.14 (s, 1H), 8.05 (d, 2H), 7.24 (m, 2H), 6.91 (t, 1H), 4.39 (d, 1H), 1.78 (m, 1H), 1.56 (m, 1H), 1.11 (m, 1H), 0.90 (m,  $J = 6.8$  Hz, 6H).  $^{13}\text{C NMR}$  (101 MHz,  $\text{DMSO-}d_6$ )  $\delta$  183.78, 172.65, 168.70, 163.75, 128.78, 121.57, 118.61, 63.91, 39.52, 24.58, 11.74. Chemical Formula:  $\text{C}_{15}\text{H}_{14}\text{N}_2\text{NaO}_4$ .

#### Catalyst 06

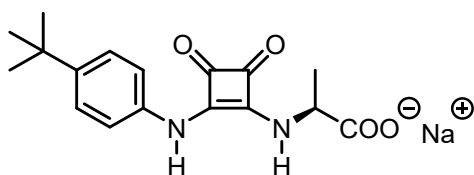

**Catalyst 06** 1.3 g; yield = 81%. White powder.  $^1\text{H NMR}$  (400 MHz,  $\text{DMSO-}d_6$ )  $\delta$  12.44 (s, 1H), 9.09 (s, 1H), 7.86 (d, 2H), 7.28 (d, 2H), 4.40 (q, 1H), 1.38 (d, 3H), 1.26 (s, 9H).  $^{13}\text{C NMR}$  (101 MHz,  $\text{DMSO-}d_6$ )  $\delta$  183.57, 180.19, 173.82, 167.78, 164.24, 144.09, 137.76, 125.37, 118.58, 54.42, 33.87, 31.23, 22.63. Chemical Formula:  $\text{C}_{17}\text{H}_{19}\text{N}_2\text{NaO}_4$ .

#### Catalyst 07

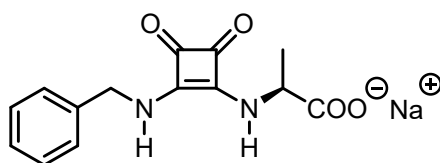

**Catalyst 07** 1.13 g; yield = 73%. White powder.  $^1\text{H NMR}$  (400 MHz,  $\text{DMSO-}d_6$ )  $\delta$  10.30 (s, 1H), 8.40 (s, 1H), 7.39 (d,  $J = 7.2$  Hz, 2H), 7.32 (t,  $J = 7.4$  Hz, 2H), 7.24 (t,  $J = 7.2$  Hz, 1H), 4.66 (d,  $J = 6.6$  Hz, 2H), 4.12 (p,  $J = 6.8$  Hz, 1H), 1.31 (d,  $J = 6.9$  Hz, 3H).  $^{13}\text{C NMR}$  (101 MHz,  $\text{DMSO-}d_6$ )  $\delta$  182.33, 182.08, 173.89, 167.00, 139.80, 128.40, 127.77, 126.97, 53.64, 46.43, 22.40. Chemical Formula:  $\text{C}_{14}\text{H}_{13}\text{N}_2\text{NaO}_4$ .

#### Catalyst 08

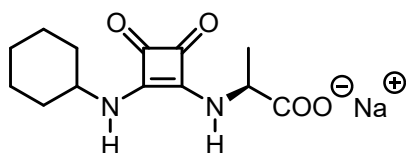

**Catalyst 08** 1.33 g; yield = 86%. White powder.  $^1\text{H NMR}$  (400 MHz,  $\text{DMSO-}d_6$ )  $\delta$  9.51 (s, 1H), 8.34 (s, 1H), 4.19 – 4.12 (m, 1H), 3.78 (dtd,  $J = 15.0, 7.3, 6.9, 4.0$  Hz, 1H), 1.75 (d,  $J = 49.9$  Hz, 6H), 1.49 (d,  $J = 35.1$  Hz, 4H).  $^{13}\text{C NMR}$  (101 MHz,  $\text{DMSO-}d_6$ )  $\delta$  181.93, 173.76, 167.27, 53.67, 52.15, 33.70, 24.85, 24.41, 22.42. Chemical Formula:  $\text{C}_{13}\text{H}_{17}\text{N}_2\text{NaO}_4$ .

#### Catalyst 09

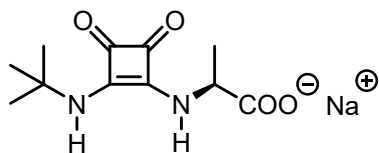

**Catalyst 09** 1.33 g; yield = 86%. Yellow powder.  $^1\text{H}$  NMR (400 MHz,  $\text{DMSO-}d_6$ )  $\delta$  9.23 (s, 1H), 8.47 (s, 1H), 4.23 (q, 1H), 1.36 (s, 9H), 1.27 (d, 3H).  $^{13}\text{C}$  NMR (101 MHz,  $\text{DMSO-}d_6$ )  $\delta$  182.08, 173.76, 167.86, 167.40, 54.03, 51.86, 30.42, 22.27. Chemical Formula:  $\text{C}_{11}\text{H}_{15}\text{N}_2\text{NaO}_4$ .

#### Catalyst 10

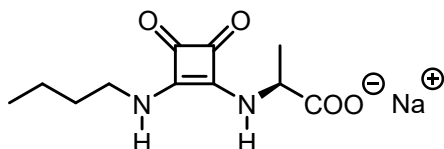

**Catalyst 09** 0.95 g; yield = 61%. Yellow powder.  $^1\text{H}$  NMR (400 MHz,  $\text{DMSO-}d_6$ )  $\delta$  9.76 (s, 1H), 8.36 (s, 1H), 4.10 (q, 1H), 3.49 (m, 2H), 1.30 (m, 4H), 0.87 (d, 3H).  $^{13}\text{C}$  NMR (101 MHz,  $\text{DMSO-}d_6$ )  $\delta$  182.27, 181.79, 173.78, 168.29, 166.72, 53.73, 42.69, 32.84, 22.53, 19.16. Chemical Formula:  $\text{C}_{11}\text{H}_{15}\text{N}_2\text{NaO}_4$ .

#### Catalyst 11

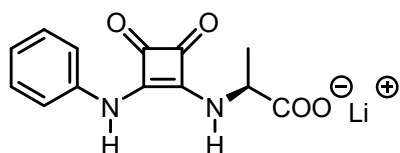

**Catalyst 11** 1.24 g; yield = 80%. Yellow powder.  $^1\text{H}$  NMR (400 MHz,  $\text{DMSO-}d_6$ )  $\delta$  12.51 (s, 1H), 9.15 (s, 1H), 7.99 (d,  $J = 8.0$  Hz, 2H), 7.31 – 7.20 (m, 2H), 6.93 (t,  $J = 7.3$  Hz, 1H), 4.49 – 4.40 (m, 1H), 1.37 (d,  $J = 7.0$  Hz, 3H).  $^{13}\text{C}$  NMR (101 MHz,  $\text{DMSO-}d_6$ )  $\delta$  183.85, 173.94, 167.94, 164.20, 140.47, 128.82, 121.82, 118.77, 54.54, 22.64.  $\text{C}_{13}\text{H}_{11}\text{N}_2\text{LiO}_4$ .

#### Catalyst 12

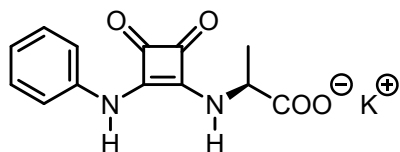

**Catalyst 12** 1.24 g; yield = 80%. Yellow powder.  $^1\text{H}$  NMR (400 MHz,  $\text{DMSO-}d_6$ )  $\delta$  12.64 (s, 1H), 9.20 (s, 1H), 8.02 (d,  $J = 7.4$  Hz, 2H), 7.29 – 7.21 (m, 2H), 6.93 (t,  $J = 7.3$  Hz, 1H), 4.44 (s, 1H), 1.37 (d,  $J = 6.9$  Hz, 3H).  $^{13}\text{C}$  NMR (101 MHz,  $\text{DMSO-}d_6$ )  $\delta$  183.84, 180.18, 173.86, 167.91, 164.20, 140.53, 128.77, 121.77, 118.80, 54.55, 22.66. Chemical Formula:  $\text{C}_{13}\text{H}_{11}\text{KN}_2\text{O}_4$ .

#### Catalyst 13

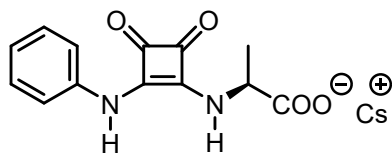

**Catalyst 13** 1.24 g; yield = 80%. Yellow powder.  $^1\text{H}$  NMR (400 MHz,  $\text{DMSO-}d_6$ )  $\delta$  12.59 (s, 1H), 9.18 (s, 1H), 8.01 (d,  $J = 8.7$  Hz, 2H), 7.30 – 7.20 (m, 2H), 6.93 (t,  $J = 7.3$  Hz, 1H), 4.48 – 4.39 (m, 1H), 1.37 (d,  $J = 7.0$  Hz, 3H).  $^{13}\text{C}$  NMR (101 MHz,  $\text{DMSO-}d_6$ )  $\delta$  183.83, 180.18, 173.80, 167.93, 164.19, 140.51, 128.78, 121.78, 118.78, 54.52, 22.61. Chemical Formula:  $\text{C}_{13}\text{H}_{11}\text{CsN}_2\text{O}_4$ .

#### Catalyst 14

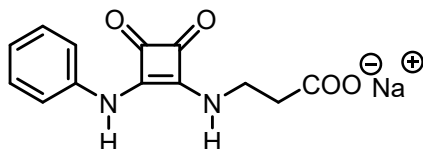

**Catalyst 14** 1.25 g; yield = 81%. Yellow powder.  $^1\text{H}$  NMR (400 MHz,  $\text{DMSO-}d_6$ )  $\delta$  12.71 (s, 1H), 9.92 (s, 1H), 7.64 (d,  $J = 7.8$  Hz, 2H), 7.27 – 7.20 (m, 2H), 6.91 (t,  $J = 7.3$  Hz, 1H), 3.78 (s, 2H), 2.29 – 2.23 (m, 2H).  $^{13}\text{C}$  NMR (101 MHz,  $\text{DMSO-}d_6$ )  $\delta$  184.35, 180.00, 174.91, 169.70, 164.36, 140.42, 128.69, 118.71, 41.53, 38.90. Chemical Formula:  $\text{C}_{13}\text{H}_{11}\text{N}_2\text{NaO}_4$ .

#### Catalyst 15

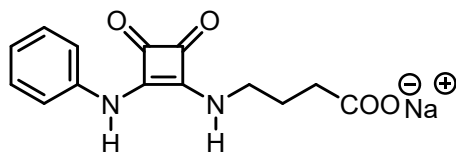

**Catalyst 15** 1.25 g; yield = 81%. Yellow powder.  $^1\text{H}$  NMR (400 MHz,  $\text{DMSO-}d_6$ )  $\delta$  12.51 (s, 1H), 9.95 (s, 1H), 7.77 (d,  $J = 8.0$  Hz, 2H), 7.25 (dd,  $J = 8.6, 7.3$  Hz, 2H), 6.93 (t,  $J = 7.3$  Hz, 1H), 3.59 (t,  $J = 7.0$  Hz, 2H), 2.11 (t,  $J = 7.3$  Hz, 2H), 1.81 (p,  $J = 7.3$  Hz, 2H).  $^{13}\text{C}$  NMR (101 MHz,  $\text{DMSO-}d_6$ )  $\delta$  184.10, 180.18, 176.38, 169.68, 164.38, 128.80, 121.69, 118.49, 43.71, 34.69, 28.06. Chemical Formula:  $\text{C}_{14}\text{H}_{13}\text{N}_2\text{NaO}_4$ .

#### Catalyst 16

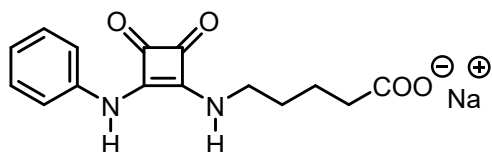

**Catalyst 16** 1.25 g; yield = 81%. Yellow powder.  $^1\text{H}$  NMR (400 MHz,  $\text{DMSO-}d_6$ )  $\delta$  12.79 (s, 1H), 10.83 (s, 1H), 7.65 (d,  $J = 7.4$  Hz, 2H), 7.29 – 7.18 (m, 2H), 6.94 – 6.87 (m, 1H), 3.56 (s, 2H), 2.03 (d,  $J = 6.8$  Hz, 2H), 1.62 – 1.46 (m, 4H).  $^{13}\text{C}$  NMR (101 MHz,  $\text{DMSO-}d_6$ )  $\delta$  184.3, 179.93, 177.43, 140.52, 128.72, 118.63, 43.72, 37.74, 30.99, 23.46. Chemical Formula:  $\text{C}_{15}\text{H}_{15}\text{N}_2\text{NaO}_4$ .

#### Catalyst 17

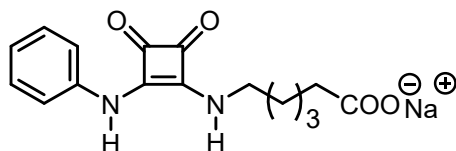

**Catalyst 17** 0.78 g; yield = 78%. Yellow powder.  $^1\text{H}$  NMR (400 MHz, DMSO- $d_6$ )  $\delta$  12.70 (s, 1H), 10.29 (s, 1H), 7.75 (d,  $J$  = 8.0 Hz, 2H), 7.32 – 7.20 (m, 2H), 6.92 (t,  $J$  = 7.3 Hz, 1H), 3.56 (d,  $J$  = 4.5 Hz, 2H), 2.01 (t,  $J$  = 7.3 Hz, 2H), 1.63 – 1.30 (m, 6H).  $^{13}\text{C}$  NMR (101 MHz, DMSO- $d_6$ )  $\delta$  184.18, 180.12, 177.70, 169.44, 128.82, 121.69, 118.50, 43.61, 37.96, 30.72, 26.19, 26.12.

#### Catalyst 18

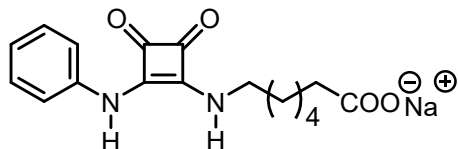

**Catalyst 18** 1.1 g; yield = 80%. Yellow powder.  $^1\text{H}$  NMR (400 MHz, DMSO- $d_6$ )  $\delta$  12.83 (s, 1H), 10.50 (s, 1H), 7.70 (d,  $J$  = 8.0 Hz, 2H), 7.28 – 7.21 (m, 2H), 6.91 (t,  $J$  = 7.3 Hz, 1H), 3.59 (d,  $J$  = 5.4 Hz, 2H), 2.00 (t,  $J$  = 6.9 Hz, 2H), 1.60 – 1.32 (m, 8H).  $^{13}\text{C}$  NMR (101 MHz, DMSO- $d_6$ )  $\delta$  184.31, 180.04, 177.63, 169.82, 164.49, 128.80, 121.68, 118.56, 43.63, 38.08, 30.40, 29.02, 26.25, 26.19.

#### Catalyst 19

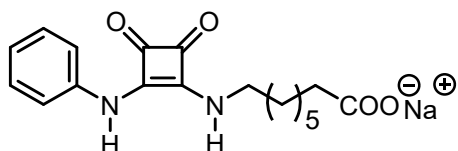

**Catalyst 19** 0.9 g; yield = 80%. Yellow powder.  $^1\text{H}$  NMR (400 MHz, DMSO- $d_6$ )  $\delta$  12.82 (s, 1H), 10.25 (s, 1H), 7.71 (d,  $J$  = 8.0 Hz, 2H), 7.24 (t,  $J$  = 7.9 Hz, 2H), 6.91 (t,  $J$  = 7.3 Hz, 1H), 3.57 (d,  $J$  = 7.8 Hz, 2H), 1.98 (t,  $J$  = 7.1 Hz, 2H), 1.61 – 1.27 (m, 10H).  $^{13}\text{C}$  NMR (101 MHz, DMSO- $d_6$ )  $\delta$  184.20, 180.11, 177.48, 169.78, 164.46, 128.81, 121.7, 118.51, 43.45, 38.05, 30.56, 29.24, 28.74, 26.23, 25.91.

#### Catalyst 20

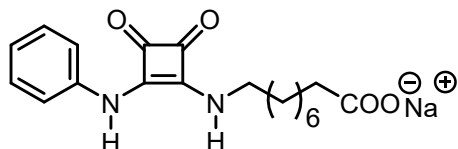

**Catalyst 20** 1.05 g; yield = 79%. Yellow powder.  $^1\text{H}$  NMR (400 MHz, DMSO- $d_6$ )  $\delta$  12.77 (s, 1H), 10.70 (s, 1H), 7.69 (d,  $J$  = 8.0 Hz, 2H), 7.24 (t,  $J$  = 7.8 Hz, 2H), 6.92 (t,  $J$  = 7.3 Hz, 1H), 3.55 (q,  $J$  = 5.8 Hz, 2H), 1.98 (t,  $J$  = 7.0 Hz, 2H), 1.48 (d,  $J$  = 147.0 Hz, 12H).  $^{13}\text{C}$  NMR (101 MHz, DMSO- $d_6$ )  $\delta$  184.24, 180.16, 177.53, 128.75, 121.65, 118.63, 42.79, 39.10, 38.89, 38.09, 30.10, 28.23, 27.33, 24.62.

#### Catalyst 21

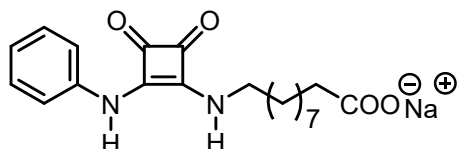

**Catalyst 21** 1.05 g; yield = 79%. Yellow powder.  $^1\text{H}$  NMR (400 MHz, DMSO- $d_6$ )  $\delta$  12.77 (s, 1H), 10.46 (s, 1H), 7.66 (d,  $J$  = 8.1 Hz, 2H), 7.24 (t,  $J$  = 7.7 Hz, 2H), 6.92 (d,  $J$  = 7.4 Hz, 1H), 3.57 (t,  $J$  = 6.4 Hz, 2H), 1.98 (t,  $J$  = 7.1 Hz, 2H), 1.58 – 1.26 (m, 14H).  $^{13}\text{C}$  NMR (101 MHz, DMSO- $d_6$ )  $\delta$  184.28, 169.93, 128.77, 121.67, 118.62, 43.24, 38.83, 30.28, 29.30, 28.56, 28.01, 27.99, 25.87, 25.21.

#### Catalyst 22

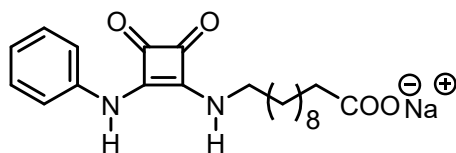

**Catalyst 22** 1.01 g; yield = 78%. Yellow powder.  $^1\text{H}$  NMR (400 MHz,  $\text{DMSO-}d_6$ )  $\delta$  12.77 (s, 1H), 10.70 (s, 1H), 7.69 (d,  $J = 8.0$  Hz, 2H), 7.24 (t,  $J = 7.8$  Hz, 2H), 6.92 (t,  $J = 7.3$  Hz, 1H), 3.55 (q,  $J = 5.8$  Hz, 2H), 1.98 (t,  $J = 7.0$  Hz, 2H), 1.27 (s, 16H).  $^{13}\text{C}$  NMR (101 MHz,  $\text{DMSO-}d_6$ )  $\delta$  184.31, 177.54, 164.58, 128.74, 121.64, 118.63, 43.02, 37.89, 30.29, 29.1, 28.56, 28.11, 28.08, 28.05, 25.96, 25.46.

### Catalyst 23

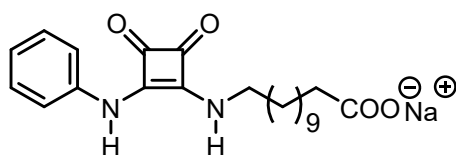

**Catalyst 23** 1.02 g; yield = 77%. Yellow powder.  $^1\text{H}$  NMR (400 MHz,  $\text{DMSO-}d_6$ )  $\delta$  12.86 (s, 1H), 11.10 (s, 1H), 7.66 (d,  $J = 8.0$  Hz, 2H), 7.24 (dd,  $J = 8.5, 7.2$  Hz, 2H), 6.92 (t,  $J = 7.3$  Hz, 1H), 3.60 (d,  $J = 5.8$  Hz, 2H), 2.01 – 1.98 (m, 2H), 1.57 – 1.27 (m, 18H).  $^{13}\text{C}$  NMR (101 MHz,  $\text{DMSO-}d_6$ )  $\delta$  184.42, 180.00, 177.65, 169.95, 164.51, 140.50, 128.74, 121.65, 118.71, 43.49, 37.81, 29.86, 27.82, 27.78, 27.75, 27.74, 27.70, 27.67, 27.62, 25.04.

## 1.2 Ring-opening polymerization of L-lactide catalyzed by squaramide-carboxylate

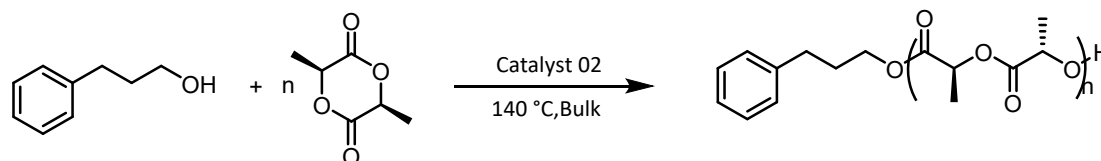

**Scheme S2.** Ring-opening polymerization of LLA using catalyst 02

In an argon-filled glovebox, L-LA (240 mg, 1.67 mmol, 25 equiv.), squaramide-carboxylate (4.7 mg, 0.017 mmol 0.25 equiv), and PPA (9  $\mu\text{L}$ , 0.067 mmol 1 equiv) were charged in a 10 mL reaction vial. The reaction mixture was stirred at 140  $^\circ\text{C}$ . After predetermined time, the polymerization was quenched by benzoic acid. The attained polymer was dissolved in a minimum amount of  $\text{CH}_2\text{Cl}_2$  and precipitated in cold methanol. The monomer conversion that was determined from the  $^1\text{H}$  NMR spectroscopy.  $^1\text{H}$  NMR( $\text{CDCl}_3$ )  $\delta$  (ppm), 1.58 (m,  $3\text{H} \times n$ ,  $(-\text{CH}_3)_n$ ), 1.97 (q, 2H,  $\text{ArCH}_2\text{CH}_2-$ ), 2.67 (t, 2H,  $\text{ArCH}_2-$ ), 4.15 (m, 2H,  $\text{ArCH}_2\text{CH}_2\text{CH}_2-$ ), 4.36 (m, 1H,  $-\text{CH}(\text{CH}_3)\text{OH}$ ), 5.10–5.23 (q,  $1\text{H} \times n - 1$ ,  $(-\text{CH}(\text{CH}_3)\text{O}-)_{n-1}$ ), 7.15–7.31 (m, 5H, aromatic).



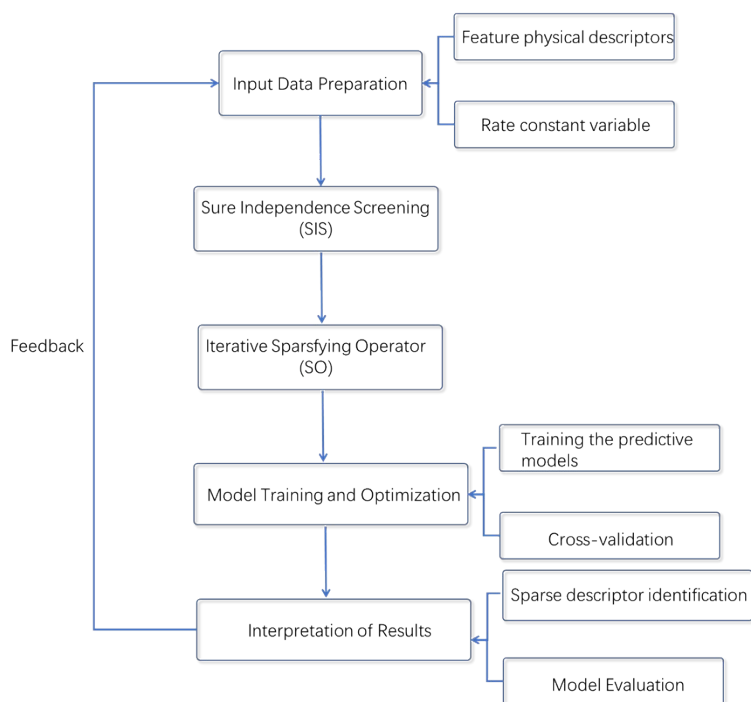

**Chart S1.** SISSO Algorithm Workflow Representation

## Supporting Tables

**Table S1.** Ring-opening polymerizations of LLA catalyzed by different CS.<sup>a</sup>

| Entry | Catalyst  | Time (h) | Conv. <sup>b</sup> (%) | TOF <sup>c</sup> (h <sup>-1</sup> ) | $M_{n,calcd}^d$ (kg mol <sup>-1</sup> ) | $M_{n,NMR}^e$ (kg mol <sup>-1</sup> ) | $M_{n,SEC}$ (kg mol <sup>-1</sup> ) | $\bar{D}^d$ |
|-------|-----------|----------|------------------------|-------------------------------------|-----------------------------------------|---------------------------------------|-------------------------------------|-------------|
| 1     | <b>01</b> | 6        | 13                     | 2.2                                 | 0.6                                     | 0.6                                   | –                                   | –           |
| 2     | <b>02</b> | 6        | 61                     | 10.2                                | 2.3                                     | 2.0                                   | 3.6                                 | 1.08        |
| 3     | <b>03</b> | 6        | 63                     | 10.5                                | 2.3                                     | 2.0                                   | 4.1                                 | 1.10        |
| 4     | <b>04</b> | 6        | 64                     | 10.7                                | 2.4                                     | 2.1                                   | 1.5                                 | 1.11        |
| 5     | <b>05</b> | 6        | 49                     | 8.2                                 | 1.8                                     | 1.8                                   | 4.3                                 | 1.17        |
| 6     | <b>06</b> | 6        | 53                     | 8.8                                 | 2.0                                     | 1.6                                   | 12.4                                | 1.02        |
| 7     | <b>07</b> | 6        | 42                     | 7.0                                 | 1.6                                     | 1.4                                   | 3.6                                 | 1.09        |
| 8     | <b>08</b> | 6        | 37                     | 6.2                                 | 1.4                                     | 2.0                                   | 2.8                                 | 1.10        |
| 9     | <b>09</b> | 6        | 45                     | 7.5                                 | 1.7                                     | 1.6                                   | 2.8                                 | 1.05        |
| 10    | <b>10</b> | 6        | 59                     | 9.8                                 | 2.1                                     | 1.9                                   | 4.1                                 | 1.10        |

<sup>a</sup>[LLA]<sub>0</sub>/[PPA]<sub>0</sub>/[Cat.] = 25/1/0.25; Temp. 140°C; bulk. <sup>b</sup>Determined by <sup>1</sup>H NMR in CDCl<sub>3</sub>. <sup>c</sup>Determined by <sup>1</sup>H NMR in CDCl<sub>3</sub>. <sup>d</sup>Calculated from  $([M]_0/[I]_0) \times \text{conv.} \times (M_w \text{ of LLA}) + (M_w \text{ of BnOH})$ . <sup>e</sup>Determined by SEC in THF using an absolute method of measurement ( $dn/dc = 0.05$ ). <sup>f</sup>Calculated by  $\text{TOF (h}^{-1}\text{)} = ([M]_0 \times \text{Conv.}) / ([\text{Cat.}]_0 \times \text{polymerization time})$ .

**Table S2** Apparent rate constants (kobs) of the LLA polymerization.a

| Entry | Crown | Cation          | [Crown] <sub>0</sub> / [Cat.] <sub>0</sub> | <i>k</i> <sub>obs</sub> / × 10 <sup>-4</sup> min <sup>-1</sup> |
|-------|-------|-----------------|--------------------------------------------|----------------------------------------------------------------|
| 1     | 12    | Li <sup>+</sup> | 0                                          | 56.9                                                           |
| 2     | 12    | Li <sup>+</sup> | 0.5                                        | 2.3                                                            |
| 3     | 12    | Li <sup>+</sup> | 1                                          | 2.6                                                            |
| 4     | 12    | Li <sup>+</sup> | 2                                          | 6.6                                                            |
| 5     | 12    | Na <sup>+</sup> | 0                                          | 96.5                                                           |
| 6     | 12    | Na <sup>+</sup> | 0.5                                        | 70.2                                                           |
| 7     | 12    | Na <sup>+</sup> | 1                                          | 70.7                                                           |
| 8     | 12    | Na <sup>+</sup> | 2                                          | 223.6                                                          |
| 9     | 12    | K <sup>+</sup>  | 0                                          | 158.1                                                          |
| 10    | 12    | K <sup>+</sup>  | 0.5                                        | 223.7                                                          |
| 11    | 12    | K <sup>+</sup>  | 1                                          | 158.1                                                          |
| 12    | 12    | K <sup>+</sup>  | 2                                          | 231.5                                                          |
| 13    | 15    | Li <sup>+</sup> | 0                                          | 56.9                                                           |
| 14    | 15    | Li <sup>+</sup> | 0.5                                        | 98.6                                                           |
| 15    | 15    | Li <sup>+</sup> | 1                                          | 4.1                                                            |
| 16    | 15    | Li <sup>+</sup> | 2                                          | 1.5                                                            |
| 17    | 15    | Na <sup>+</sup> | 0                                          | 96.5                                                           |
| 18    | 15    | Na <sup>+</sup> | 0.5                                        | 111.8                                                          |
| 19    | 15    | Na <sup>+</sup> | 1                                          | 111.8                                                          |
| 20    | 15    | Na <sup>+</sup> | 2                                          | 103.8                                                          |
| 21    | 15    | K <sup>+</sup>  | 0                                          | 158.1                                                          |
| 22    | 15    | K <sup>+</sup>  | 0.5                                        | 223.6                                                          |
| 23    | 15    | K <sup>+</sup>  | 1                                          | 169.0                                                          |
| 24    | 15    | K <sup>+</sup>  | 2                                          | 223.6                                                          |
| 25    | 18    | Li <sup>+</sup> | 0                                          | 56.9                                                           |
| 26    | 18    | Li <sup>+</sup> | 0.5                                        | 4.8                                                            |
| 27    | 18    | Li <sup>+</sup> | 1                                          | 1.1                                                            |
| 28    | 18    | Li <sup>+</sup> | 2                                          | 5.4                                                            |
| 29    | 18    | Na <sup>+</sup> | 0                                          | 96.5                                                           |
| 30    | 18    | Na <sup>+</sup> | 0.5                                        | 158.1                                                          |
| 31    | 18    | Na <sup>+</sup> | 1                                          | 174.6                                                          |
| 32    | 18    | Na <sup>+</sup> | 2                                          | 223.7                                                          |
| 33    | 18    | K <sup>+</sup>  | 0                                          | 158.1                                                          |
| 34    | 18    | K <sup>+</sup>  | 0.5                                        | 260.1                                                          |
| 35    | 18    | K <sup>+</sup>  | 1                                          | 260.1                                                          |
| 36    | 18    | K <sup>+</sup>  | 2                                          | 158.1                                                          |

<sup>a</sup>Determined from the semilogarithmic plots of LLA polymerizations initiated with PPA and catalysed with different catalysts.

Reaction conditions of the polymerizations: [LLA]<sub>0</sub>/[PPA]<sub>0</sub>/[Catalysis]<sub>0</sub> = 25/1/0.25, 140 °C

**Table S3** Primary features derived from bench experiments and DFT simulation

| Entry          | Feature symbol          | Description                                                        | Unit                   |
|----------------|-------------------------|--------------------------------------------------------------------|------------------------|
| 1              | $c$                     | ratio of crown ether                                               | -                      |
| 2              | $r_d$                   | radius of alkali cation                                            | Å                      |
| 3              | $\Delta E$              | dissociation energy of catalyst complex (electronic energy)        | eV                     |
| 4              | $\Delta G$              | dissociation energy of catalyst complex (Gibbs free energy)        | kcal·mol <sup>-1</sup> |
| 5              | $\Delta E_n$            | weight of $\Delta E$ ( $\Delta E_n = \Delta E \cdot c$ )           | eV                     |
| 6              | $\Delta G_n$            | weight of $\Delta G$ ( $\Delta G_n = \Delta G \cdot c$ )           | kcal·mol <sup>-1</sup> |
| 7              | %V_Bur <sup>a</sup>     | percent buried volume centered on alkali cation                    | -                      |
| 8 <sup>b</sup> | $E_N$                   | the electronic energy of catalyst molecule                         | Hartree                |
| 9              | $E_{N-1}$               | the electronic energy of catalyst molecule (subtract one electron) | Hartree                |
| 10             | $E_{N+1}$               | the electronic energy of catalyst molecule (gain one electron)     | Hartree                |
| 11             | $E_{\text{HOMO}}^N$     | HOMO orbital energy of catalyst                                    | Hartree                |
| 12             | $E_{\text{HOMO}}^{N-1}$ | HOMO orbital energy of catalyst                                    | Hartree                |
| 13             | $V_{\text{IP}}$         | vertical ionization potential                                      | Hartree                |
| 14             | $V_{\text{EA}}$         | vertical electron affinity                                         | -                      |
| 15             | $C_p$                   | chemical potential                                                 | -                      |
| 16             | H                       | hardness                                                           | -                      |
| 17             | S                       | softness                                                           | Hartree <sup>-1</sup>  |
| 18             | $N_i$                   | nucleophilicity index                                              | Hartree                |
| 19             | $E_i$                   | electrophilicity index                                             | -                      |
| 20             | $H_{\text{sf}}$         | Hirshfeld charge of alkali cation                                  | -                      |

|    |             |                                                           |   |
|----|-------------|-----------------------------------------------------------|---|
| 21 | $H_{adch}$  | atomic dipole moment-corrected Hirshfeld charges          | - |
| 22 | $M_q^N$     | Hirshfeld charge of alkali cation                         | - |
| 23 | $M_q^{N-1}$ | Hirshfeld charge of alkali cation (subtract one electron) | - |
| 24 | $M_q^{N+1}$ | Hirshfeld charge of alkali cation (gain one electron)     | - |
| 25 | $M_{f+}$    | condensed Fukui function (nucleophilic reaction)          | - |
| 26 | $M_{f-}$    | condensed Fukui function (electrophilic reaction)         | - |
| 27 | $M_{nu}$    | condensed local nucleophilicity                           | - |
| 28 | $M_{s+}$    | relative nucleophilicity index                            | - |
| 29 | $M_{s-}$    | relative electrophilicity index                           | - |

a the optimized structures were analysed using the open-source Python package DBSTEP<sup>1</sup>; b data presented at entry 8-29 derived from optimized structures and further analysed by the Multiwfn software package<sup>2</sup>.

**Table S4.** The correlation between  $k_{obs}$  and physical descriptors analysed by SISO model.

|    |                                                                                                                                                                                                      |                                      |
|----|------------------------------------------------------------------------------------------------------------------------------------------------------------------------------------------------------|--------------------------------------|
| Q1 | $k_{obs} = b + a \cdot \left( \frac{E_N}{\Delta E_n} \right) \cdot (M_{S+} - \Delta G_n)$                                                                                                            | R <sup>2</sup> = 0.74<br>RMSE = 3.57 |
| Q2 | $k_{obs} = b + a_1 \left( \left( (H_{adch} \cdot c) - \left( \frac{M_{nu}}{H_{adch}} \right) \right) \right) + a_2 \left( \left( \frac{E_N}{\Delta E_n} \right) \cdot (M_{S+} - \Delta G_n) \right)$ | R <sup>2</sup> = 0.89<br>RMSE = 2.34 |
| Q3 | $k_{obs} = b + a(E_N \cdot r) \cdot (M_{S+} - \Delta E)$                                                                                                                                             | R <sup>2</sup> = 0.69<br>RMSE = 3.87 |
| Q4 | $k_{obs} = b + a_1 \left( \frac{\sin(\Delta E_n)}{M_{S+} - \%V_{Bur}} \right) + a_2(E_N \cdot r \cdot (M_{S+} - \Delta G))$                                                                          | R <sup>2</sup> = 0.88<br>RMSE = 2.45 |

## Supporting Figures

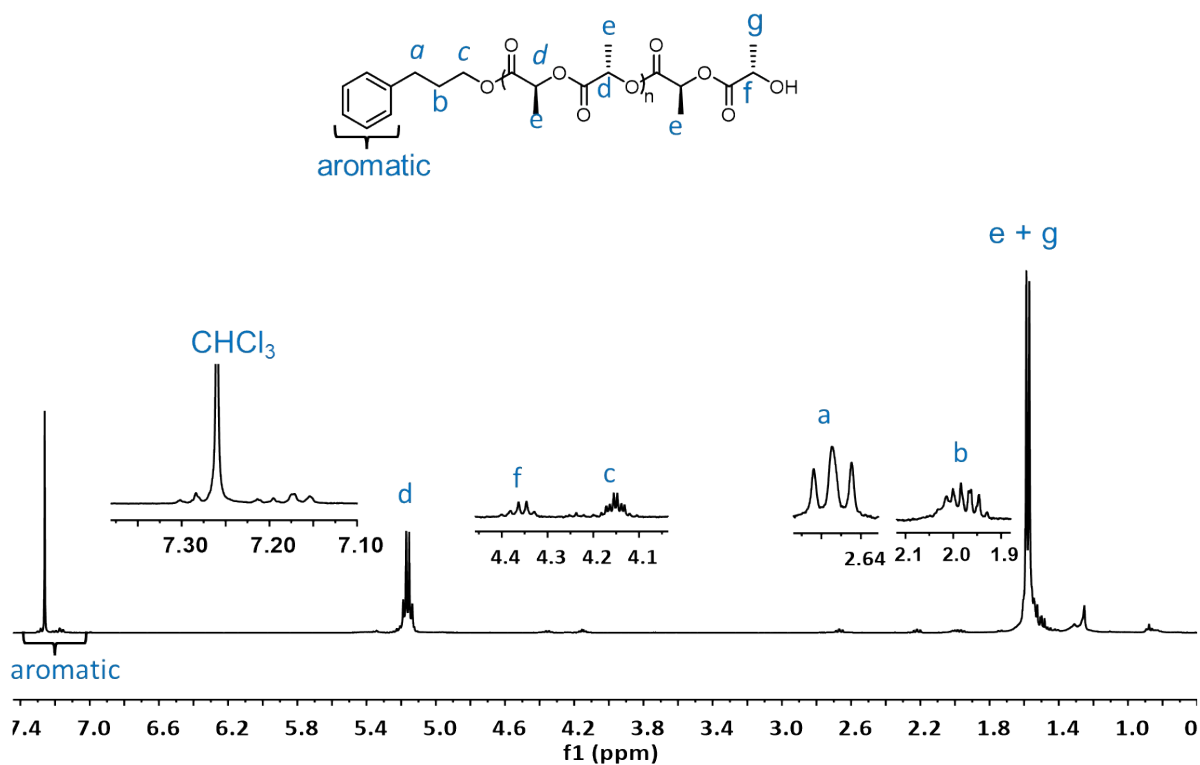

**Figure S1.**  $^1\text{H}$  NMR spectrum of poly(lactide) initiated by PPA in  $\text{CDCl}_3$  (Table 1, entry 1). Experimental conditions: 1.6 mmol LLA,  $[\text{PPA}]_0/[\text{Catalysis}]_0/[\text{LLA}]_0 = 1/0.25/25$ , at  $140^\circ\text{C}$ , in bulk for 6 h.

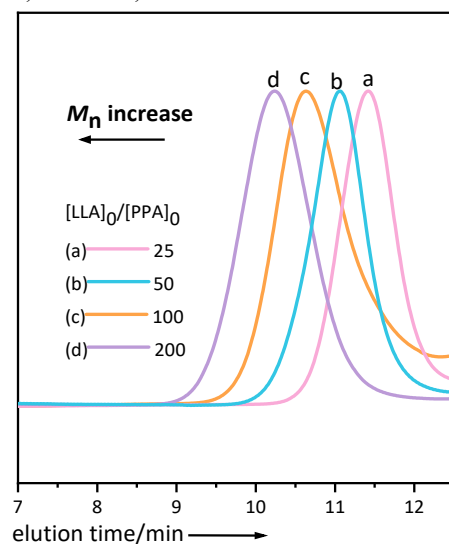

**Figure S2.** SEC traces of the obtained PLA samples with series ratios of  $[\text{M}]_0/[\text{I}]_0 = 25; 50; 100; 200$  (Table 1, entry 1-4) (eluent, THF; flow rate,  $0.7\text{ ml min}^{-1}$ ).

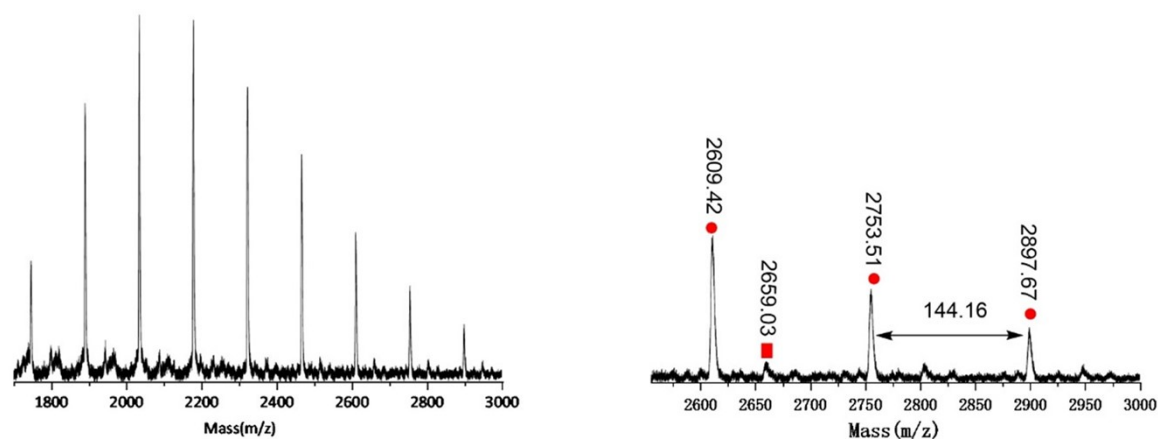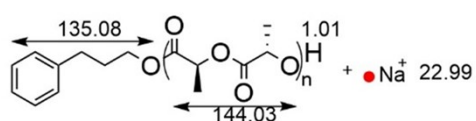

$$\text{mass} = [\text{PPA}] + [\text{monomer unit}] \times n + \text{Na}^+$$

or

$$\text{mass} = [\text{H}_2\text{O}] + [\text{monomer unit}] \times n + \text{Na}^+$$

| Cationic Agent  | [initiator] = PPA |         |         |
|-----------------|-------------------|---------|---------|
|                 | 17                | 18      | 19      |
| Na <sup>+</sup> | Calc. 2609.29     | 2753.42 | 2897.55 |
|                 | Exp. 2609.42      | 2753.51 | 2897.67 |

**Figure S3.** MALDI mass spectrum of PLLA (precipitation from ethanol), magnification between  $m/z = 1800$  and  $m/z = 3000$ . **Table 1** entry 1. Purification was carried out by precipitation in ethanol.

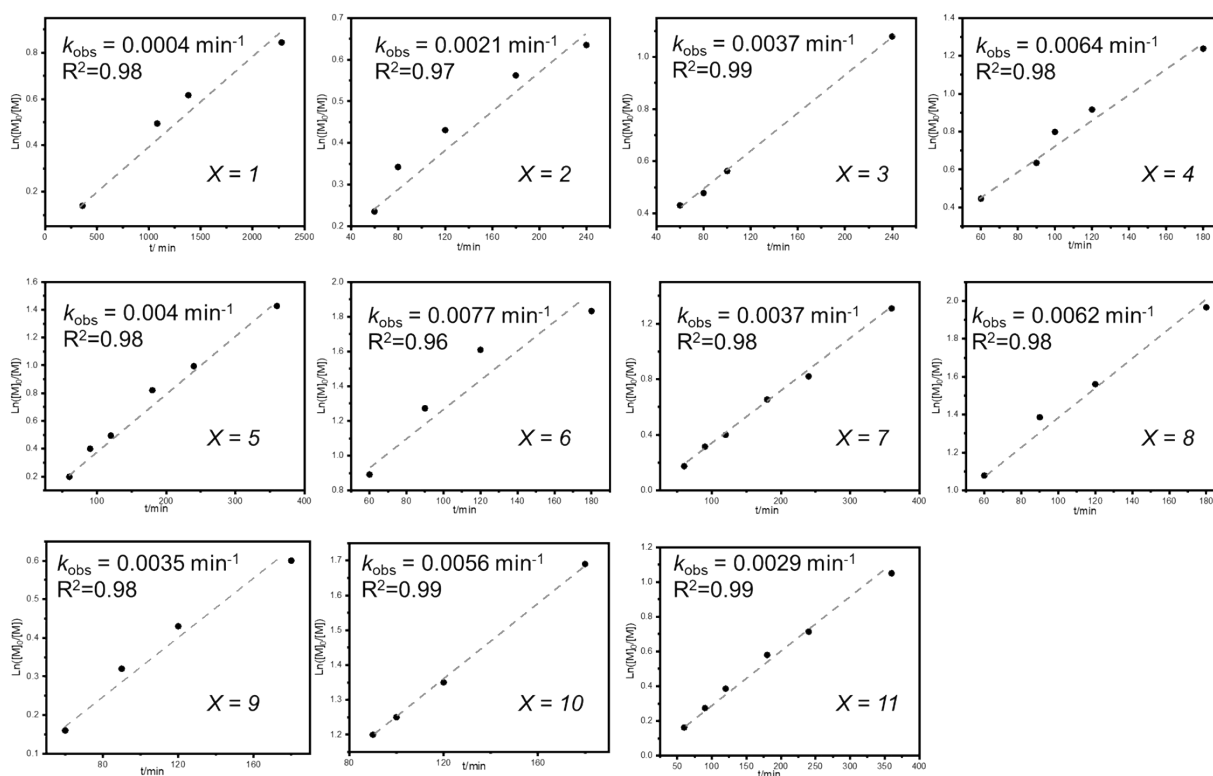

**Figure S4.** Semilogarithmic kinetic plot of the ROP of LLA catalyzed by squaramide-carboxylate with different lengths of  $\text{CH}_2$  segments. Conditions:  $[\text{LLA}]_0/[\text{BnOH}]_0/[\text{Cat.}] = 25/1/0.25$ ,  $T = 140^\circ\text{C}$  in bulk.

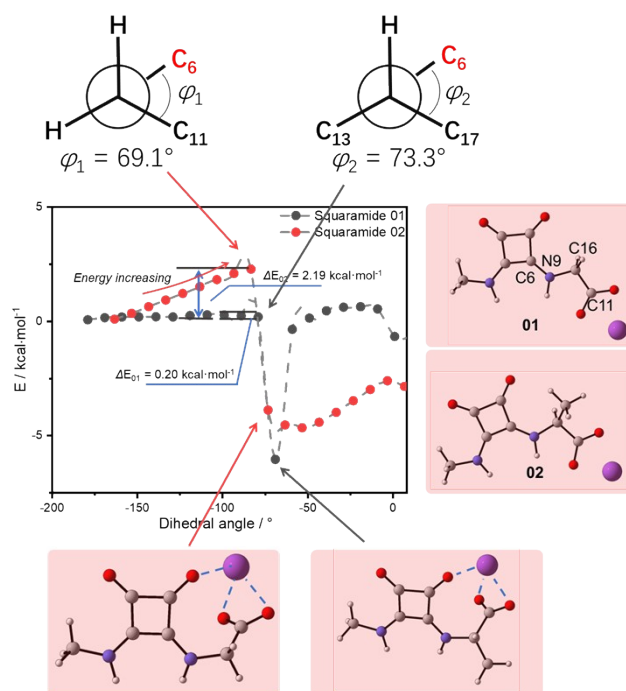

**Figure S5.** The relaxed scan of dihedral angle C6-N9-C16-C11. The phenyl group was replaced by methyl to reduce the cost of simulation. The gradual increase of dihedral angle leads to different the rotation energies, where the high energy required for **02** to rotate as compared to **01** ( $\Delta E_{02}$  vs  $\Delta E_{01}$ , 2.19 vs 0.2 kcal·mol<sup>-1</sup>). This demonstrate the steric hindrance induced by methyl group enables a stable structure for the catalyzation process. Calculation level: B3LYP//6-31+G(d,p).

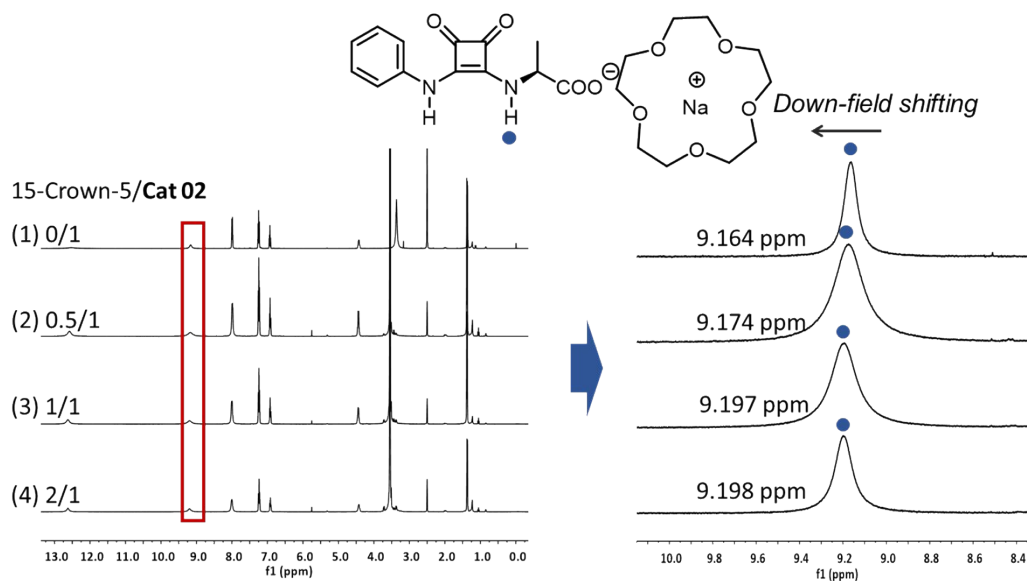

**Figure S6.** <sup>1</sup>H NMR spectrum (DMSO-*d*<sub>6</sub>, 400 MHz) of catalyst **02** and 15-crown-5 with different ratios.

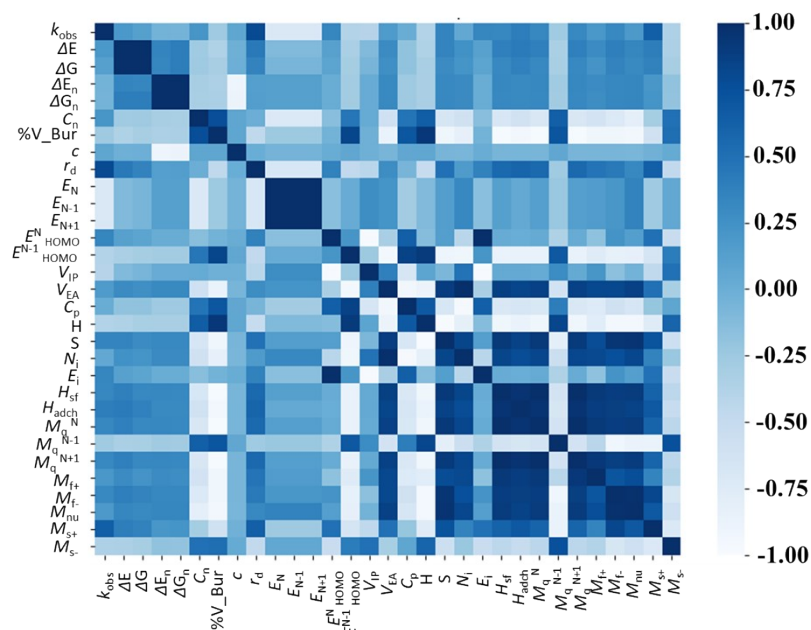

**Figure S7.** Heatmap representing the correlation between  $k_{\text{obs}}$  and single descriptor (electronic, thermodynamic, and bench results) for CS, deeper blue color represents stronger correlation.

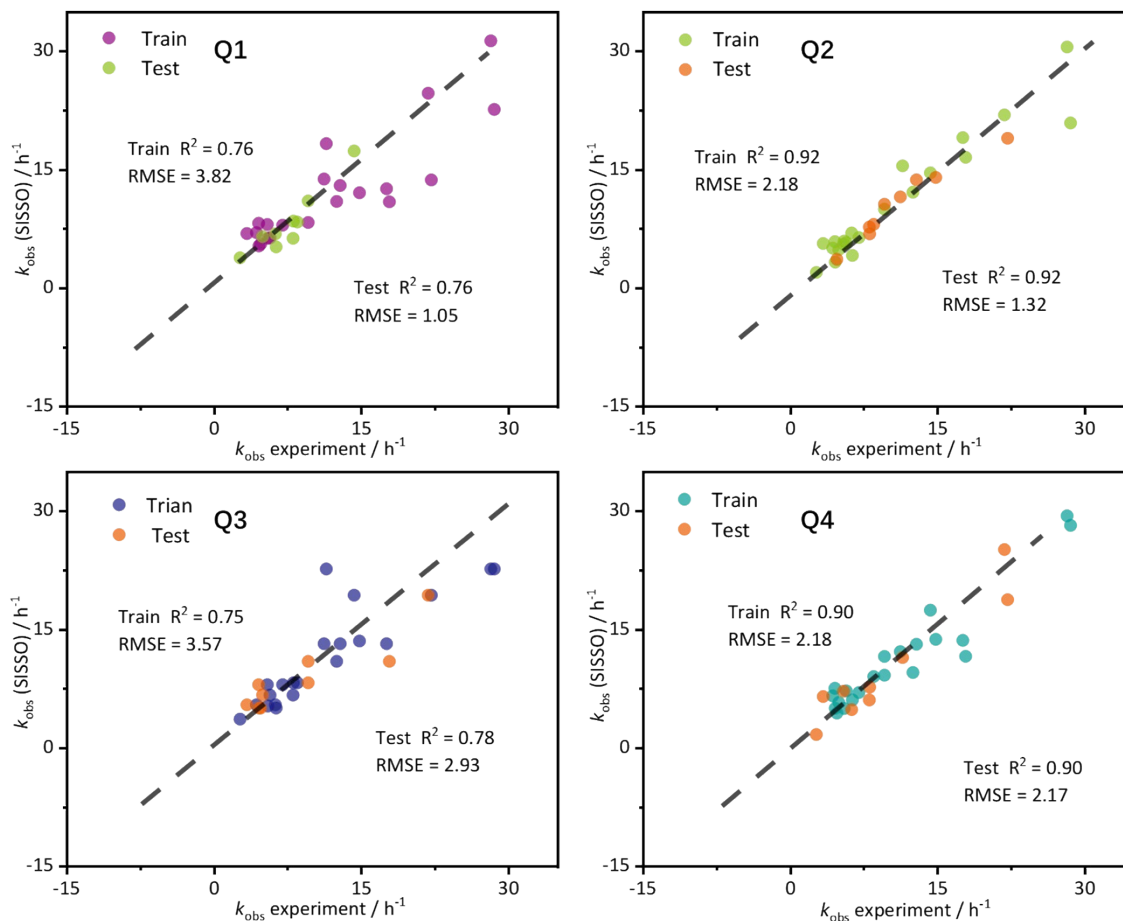

**Figure S8.** The visualization of the representative SISSO model with different physical descriptors. 70% of  $k_{\text{obs}}$  was randomly selected for training, while the remaining 30% was used for testing.



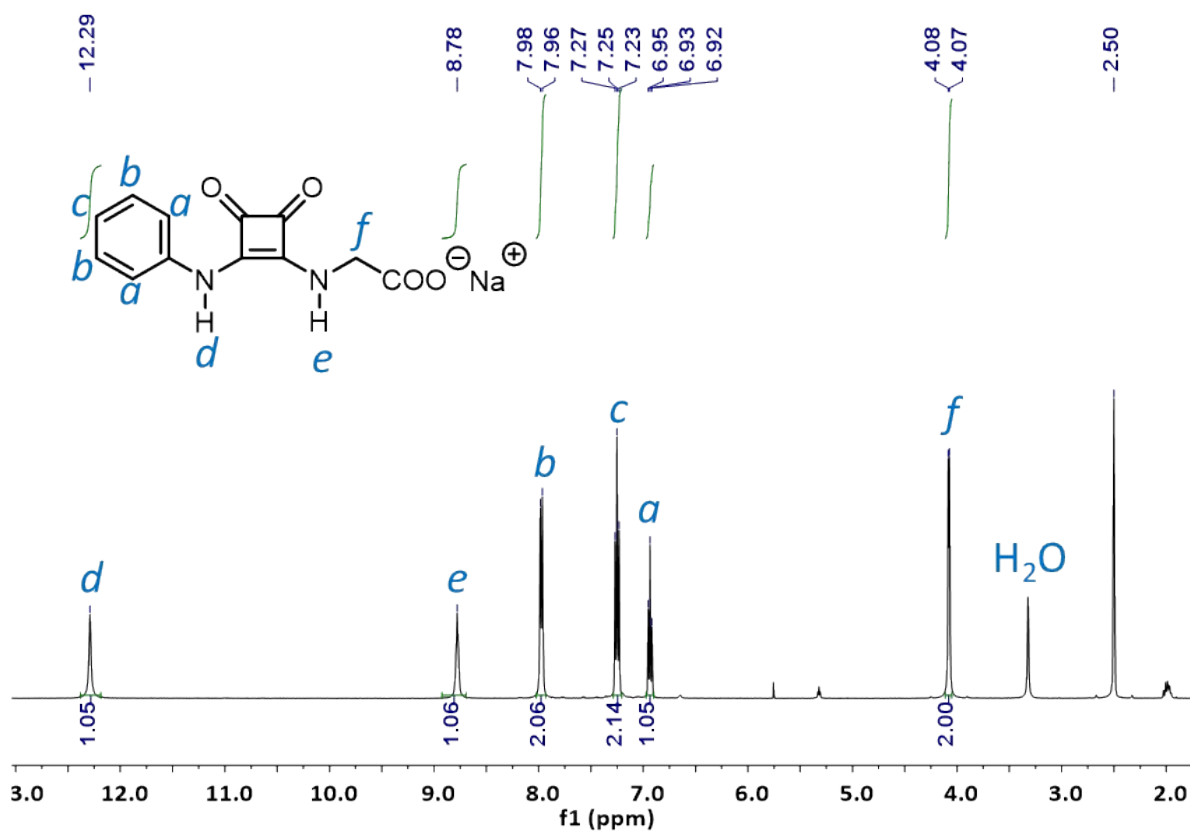

Figure S9. <sup>1</sup>H NMR spectrum (DMSO-*d*<sub>6</sub>, 400 MHz) of catalyst 01

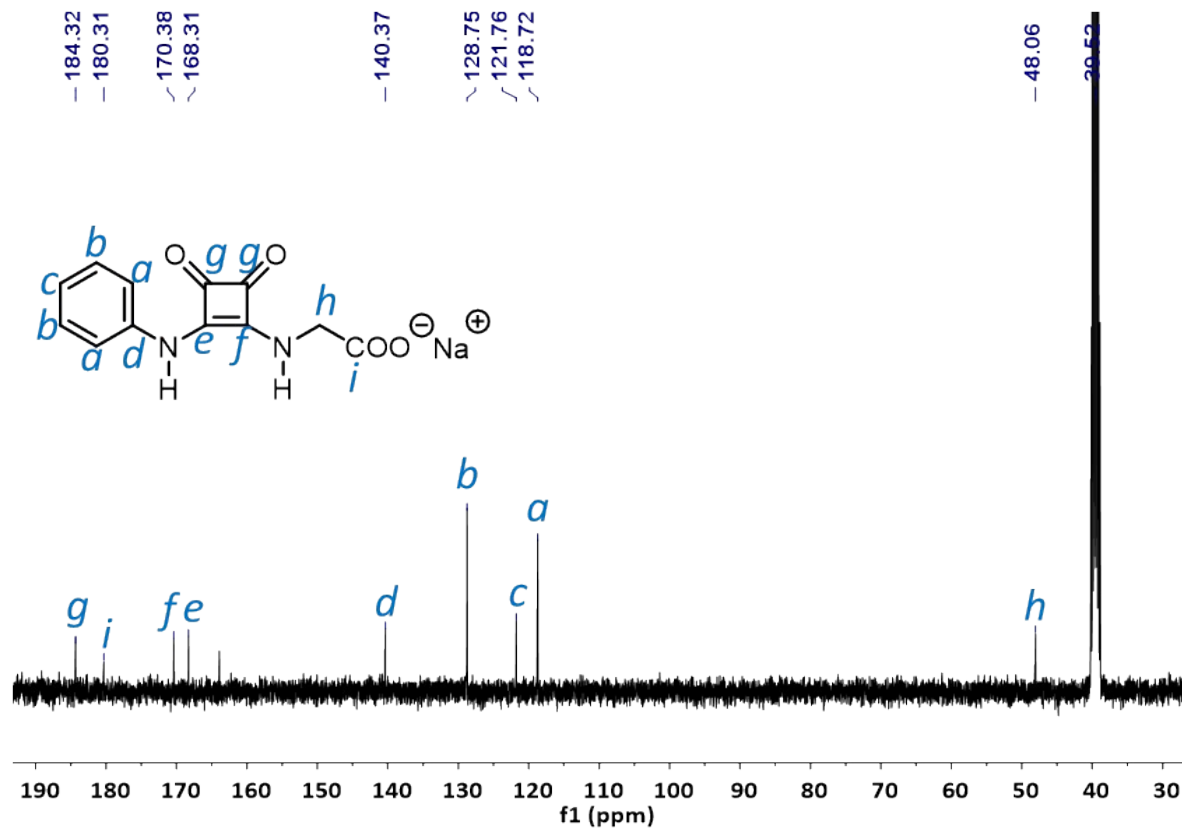

Figure S10. <sup>13</sup>C NMR spectrum (DMSO-*d*<sub>6</sub>, 101 MHz) of catalyst 01

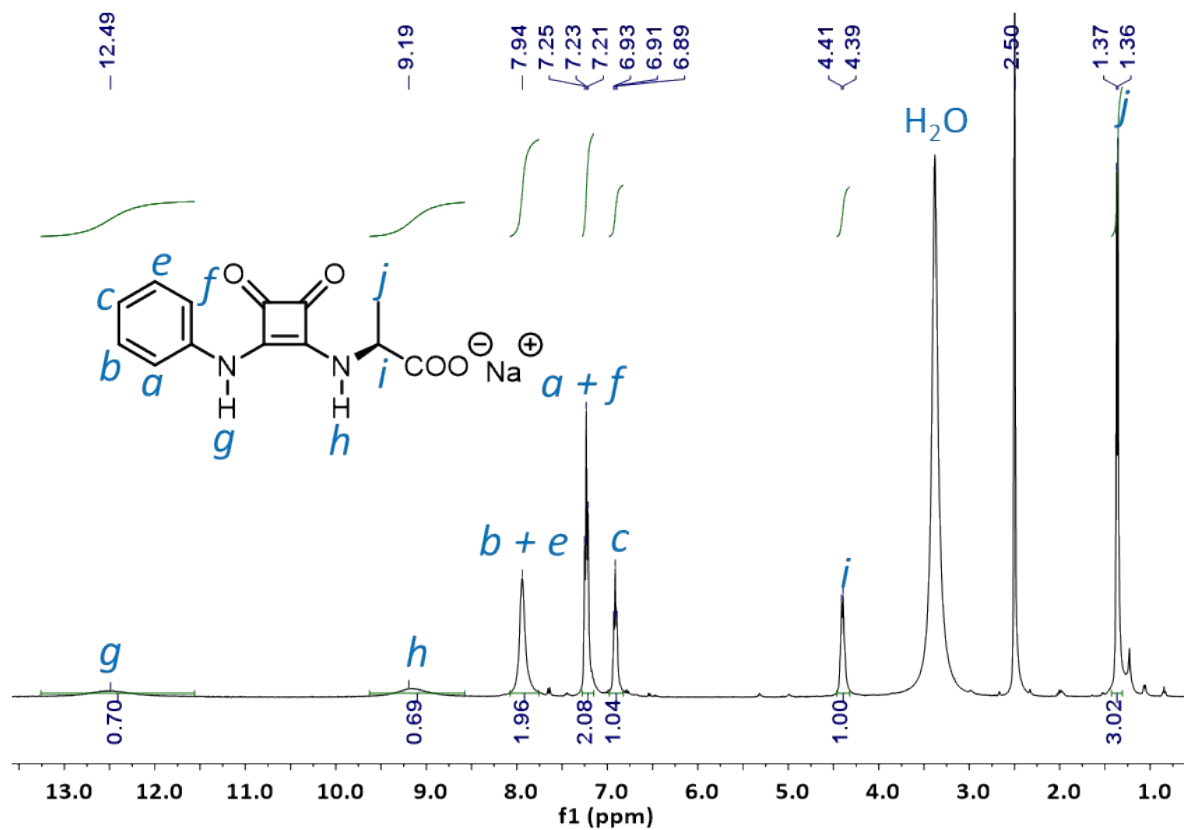

Figure S11. <sup>1</sup>H NMR spectrum (DMSO-*d*<sub>6</sub>, 400 MHz) of catalyst 02

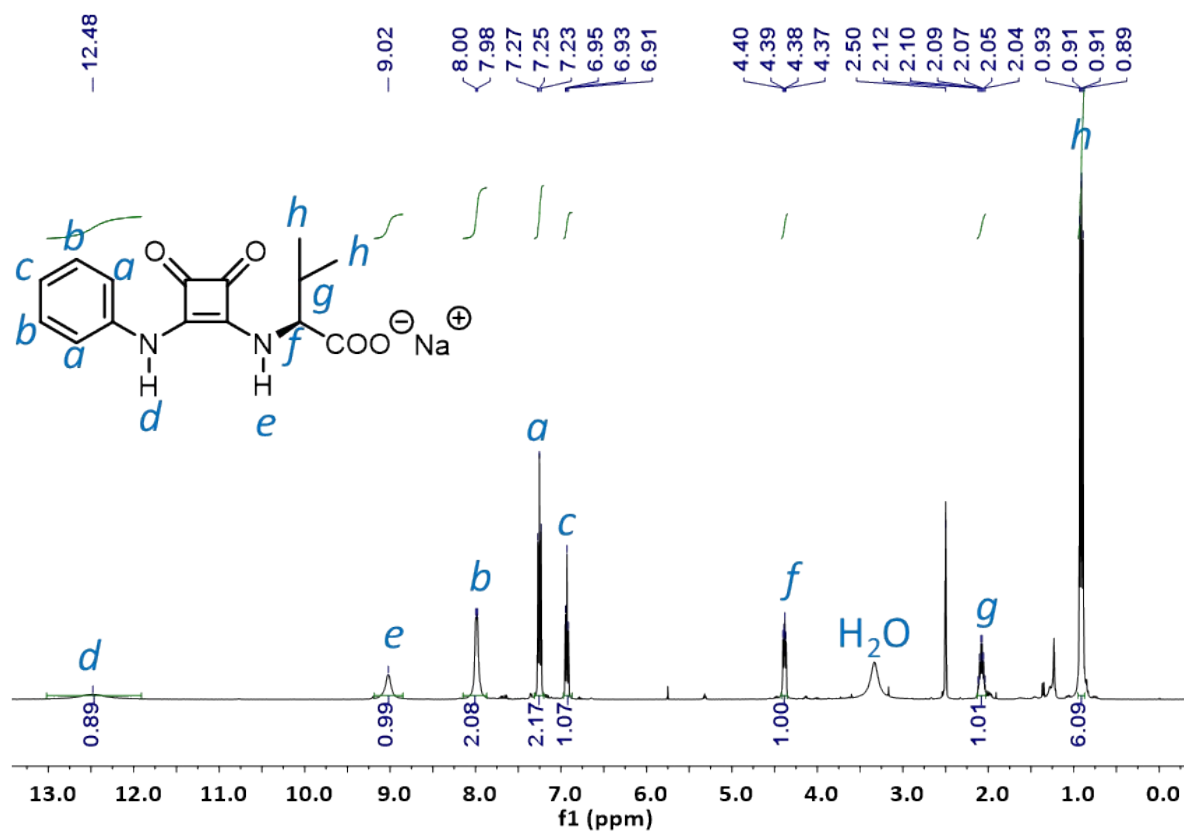

Figure S12. <sup>1</sup>H NMR spectrum (DMSO-*d*<sub>6</sub>, 400 MHz) of catalyst 03

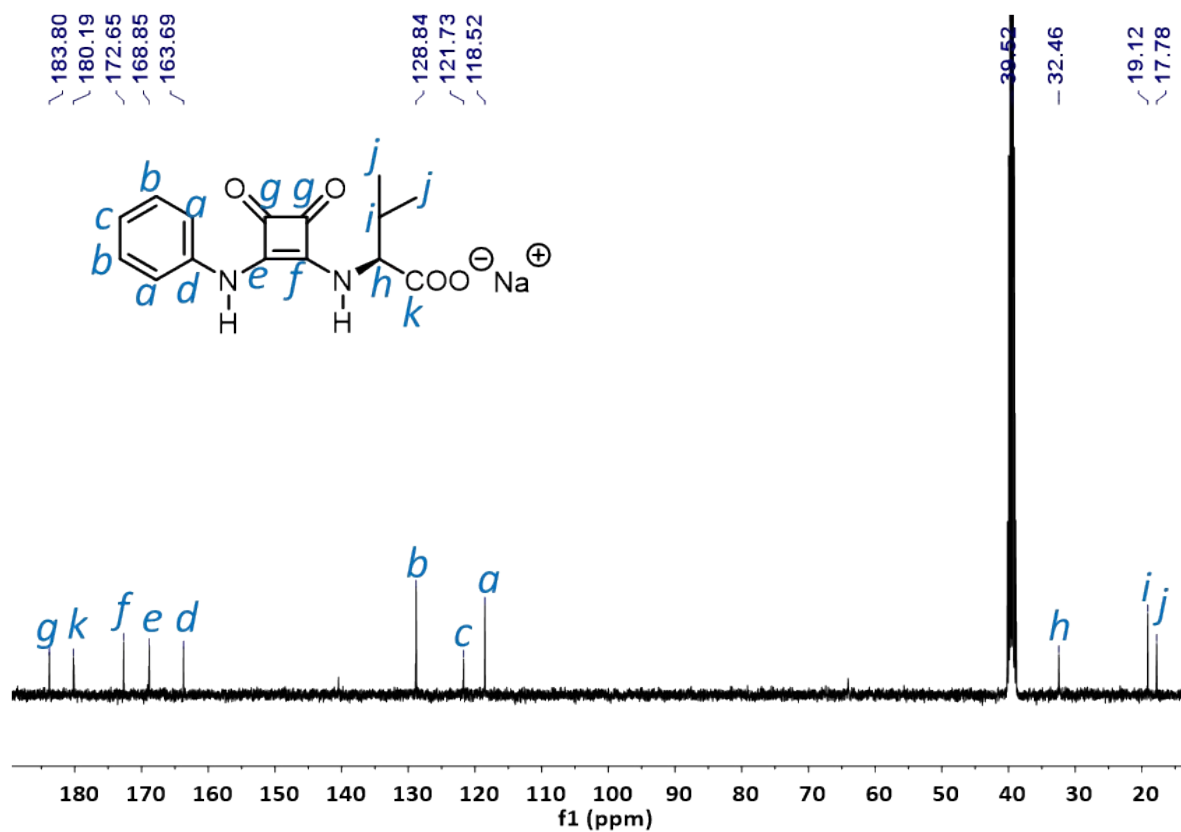

Figure S13.  $^{13}\text{C}$  NMR spectrum (DMSO- $d_6$ , 101 MHz) of catalyst 03

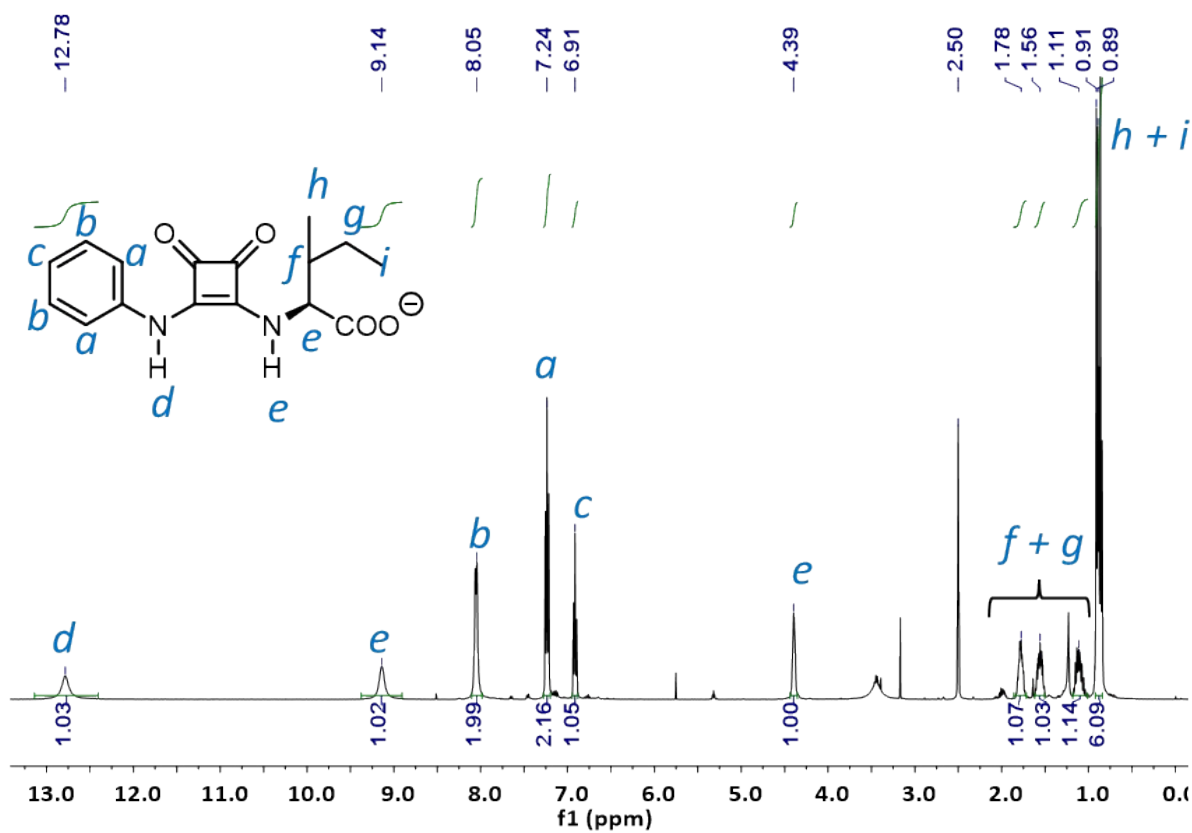

Figure S14.  $^1\text{H}$  NMR spectrum (DMSO- $d_6$ , 400 MHz) of catalyst 04

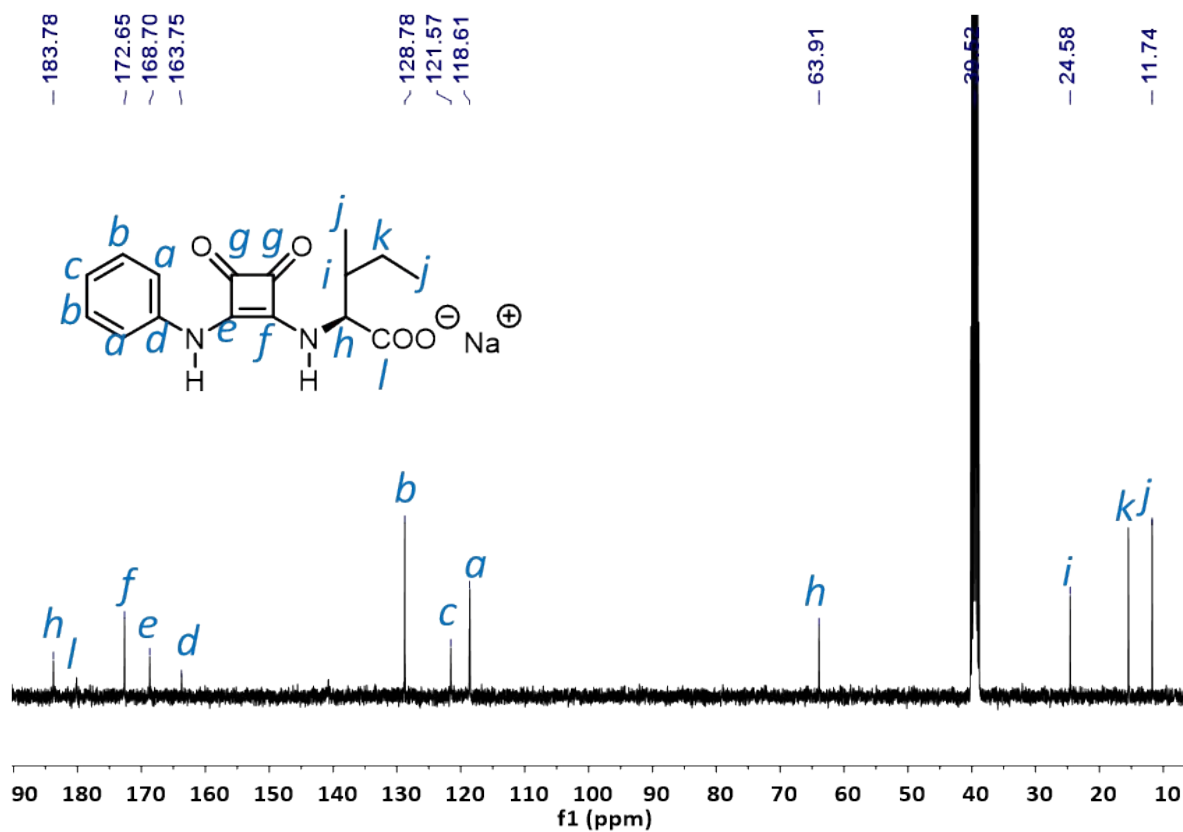

Figure S15.  $^{13}\text{C}$  NMR spectrum (DMSO- $d_6$ , 400 MHz) of catalyst 04

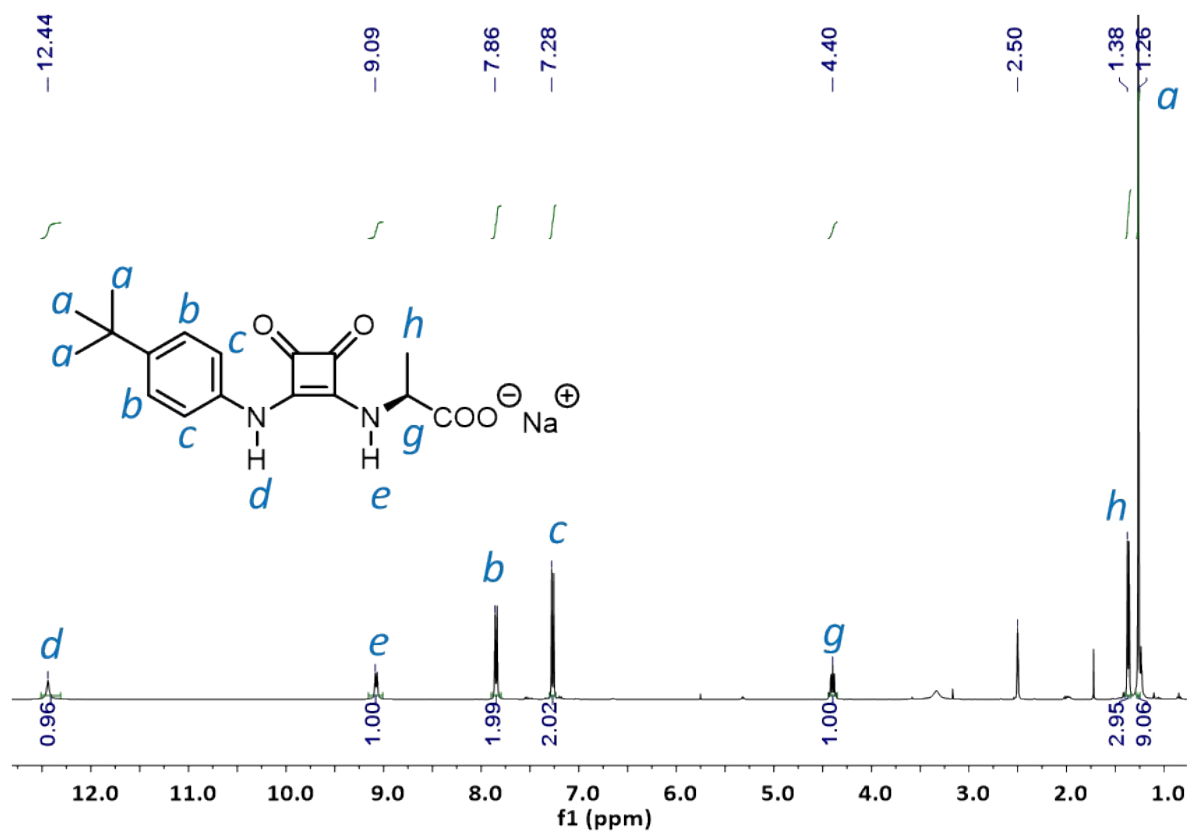

Figure S16.  $^1\text{H}$  NMR spectrum (DMSO- $d_6$ , 400 MHz) of catalyst 05

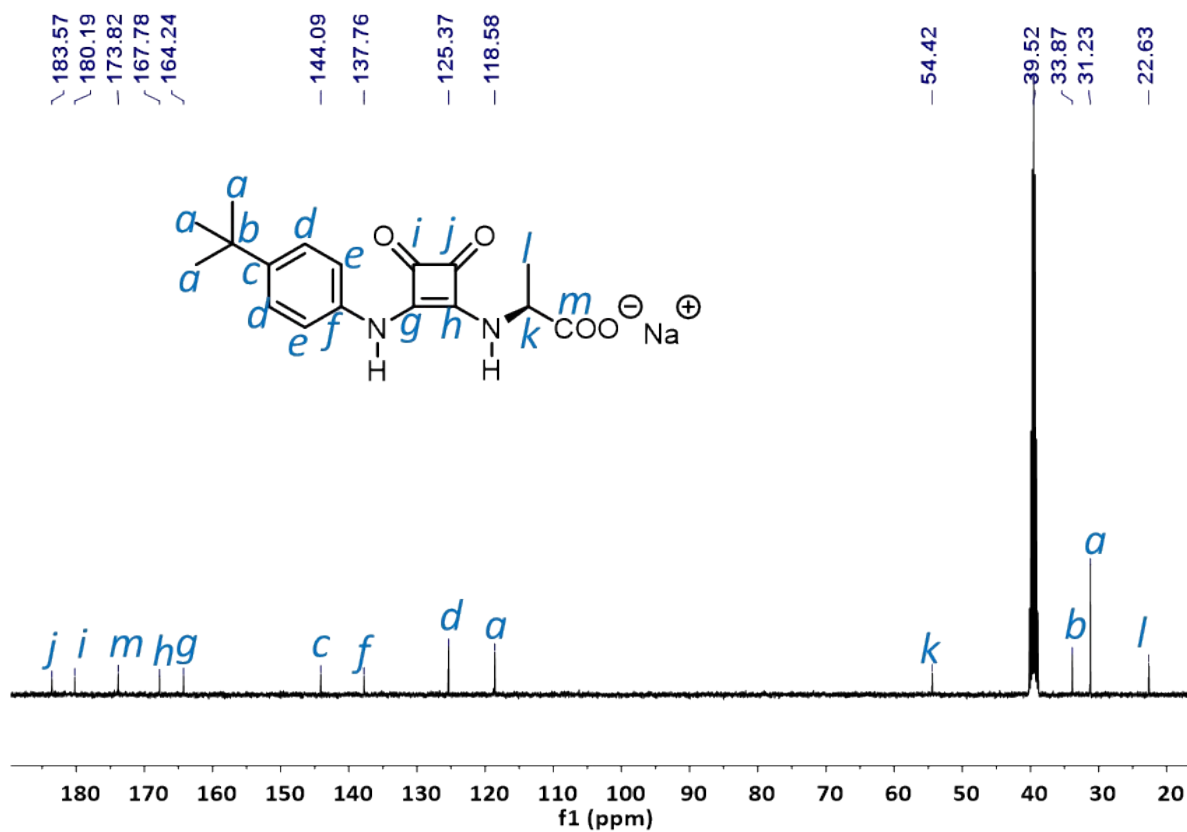

Figure S17.  $^{13}\text{C}$  NMR spectrum (DMSO- $d_6$ , 101 MHz) of catalyst 05

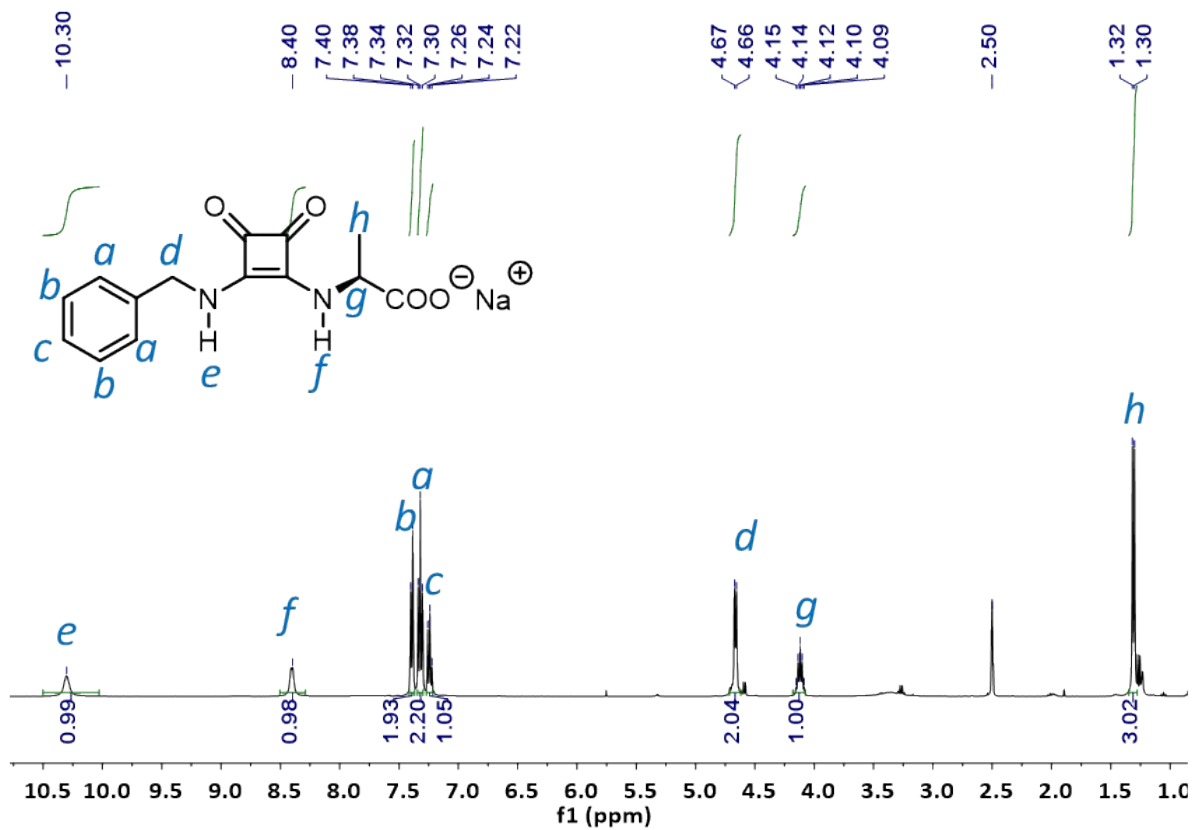

Figure S18.  $^1\text{H}$  NMR spectrum (DMSO- $d_6$ , 400 MHz) of catalyst 07

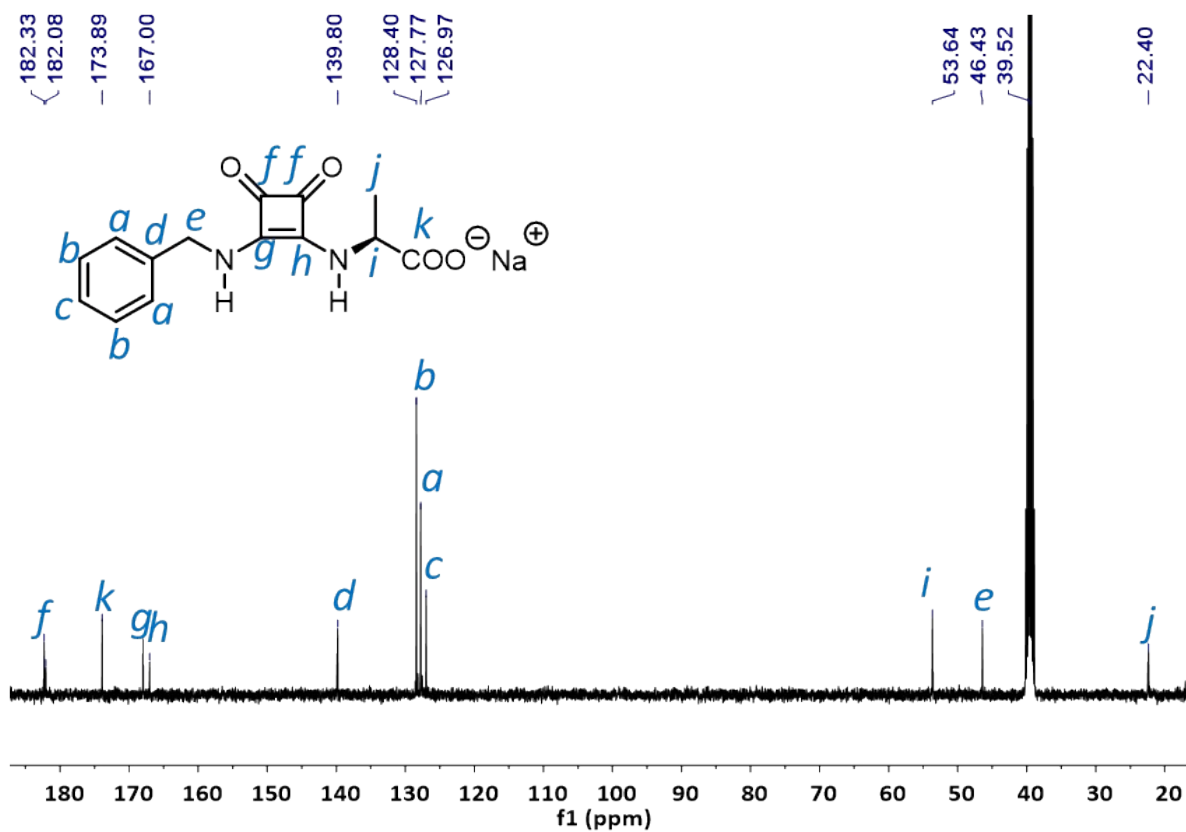

Figure S19.  $^{13}\text{C}$  NMR spectrum (DMSO- $d_6$ , 101 MHz) of catalyst 07

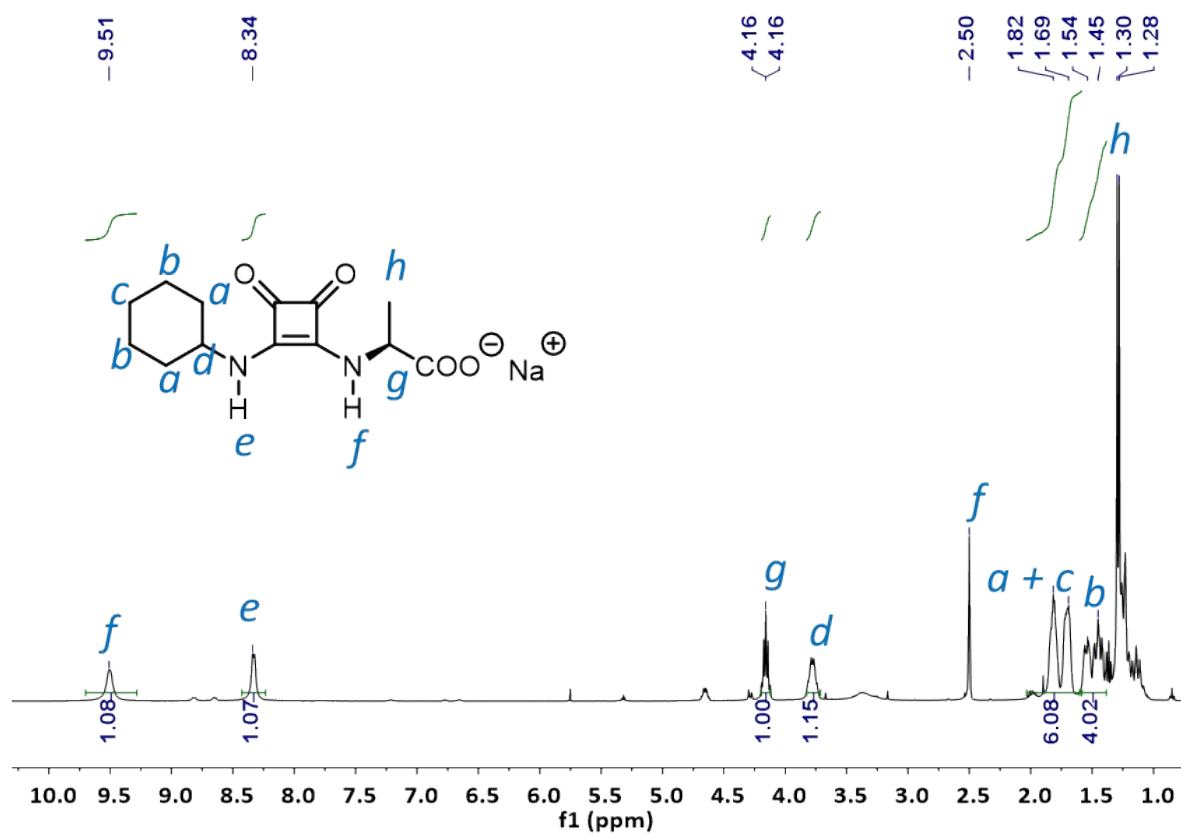

Figure S20.  $^1\text{H}$  NMR spectrum (DMSO- $d_6$ , 400 MHz) of catalyst 08



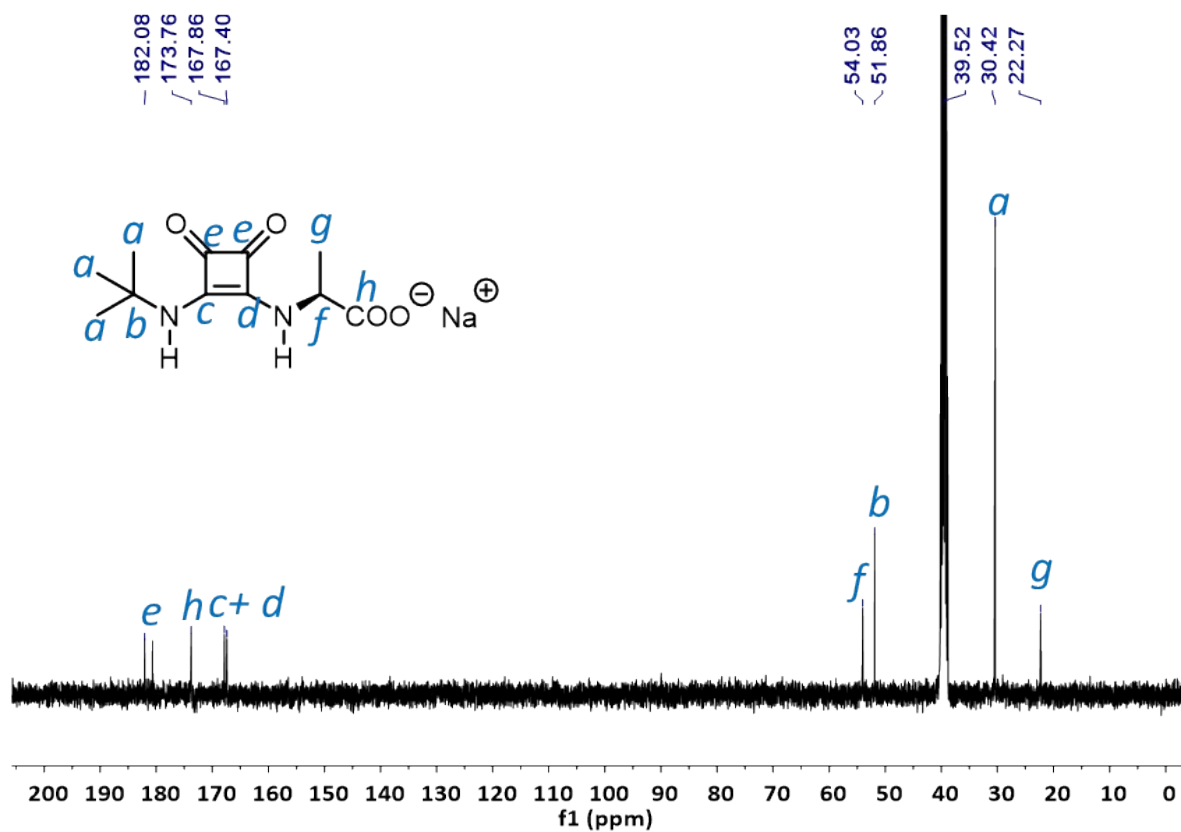

Figure S23.  $^{13}\text{C}$  NMR spectrum (DMSO- $d_6$ , 101 MHz) of catalyst 09

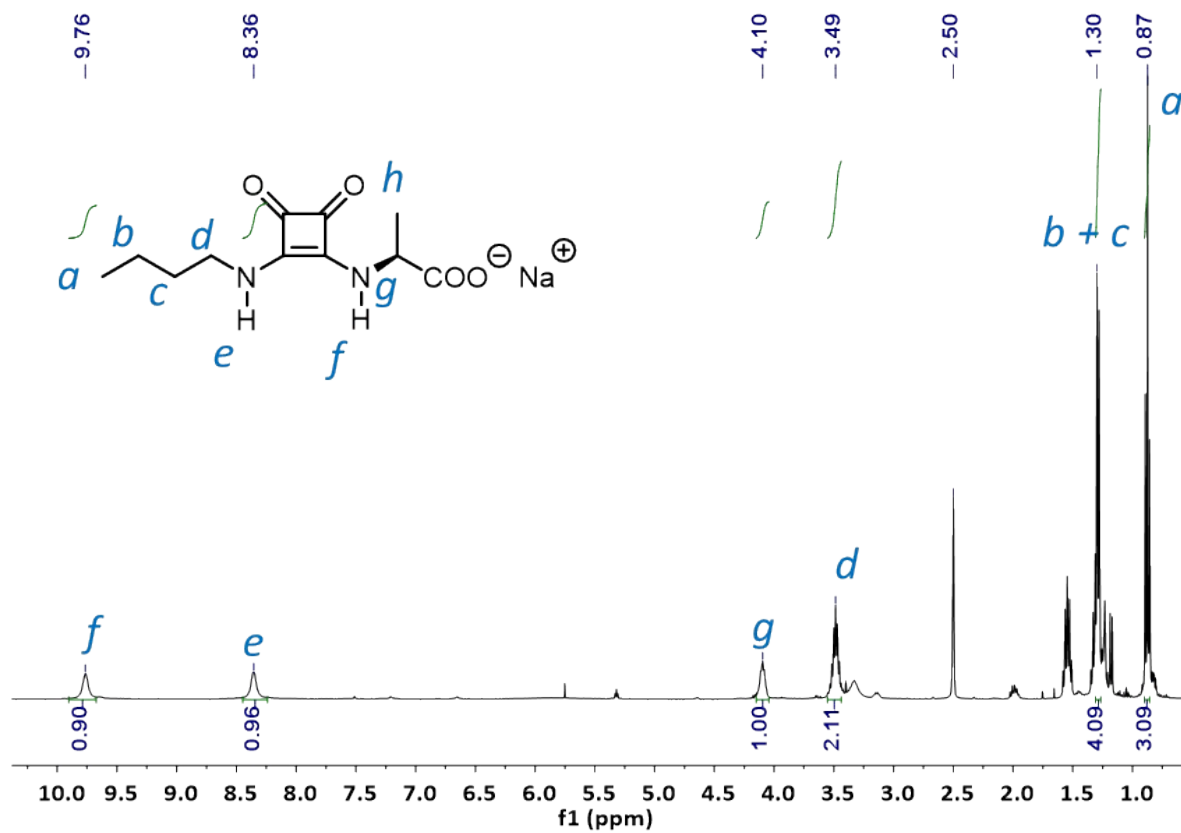

Figure S24.  $^1\text{H}$  NMR spectrum (DMSO- $d_6$ , 400 MHz) of catalyst 10



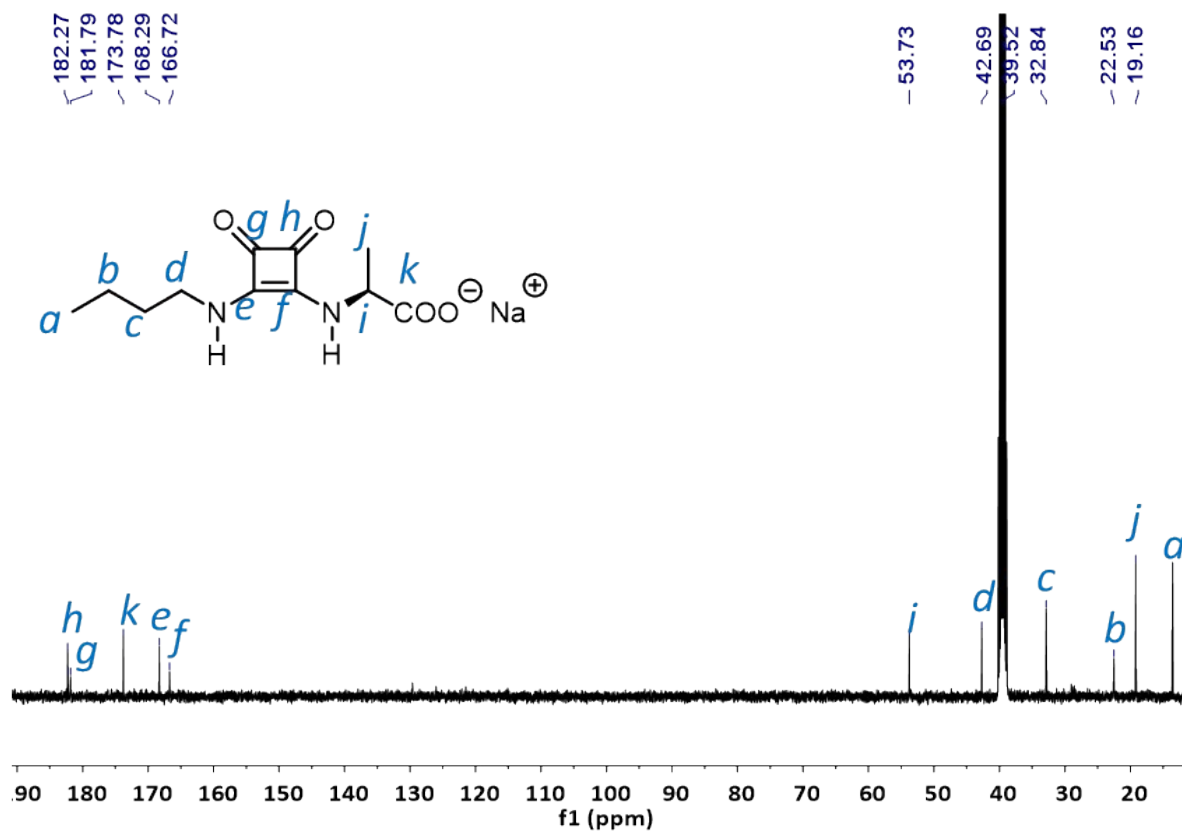

Figure S25.  $^{13}\text{C}$  NMR spectrum (DMSO- $d_6$ , 101 MHz) of catalyst 10

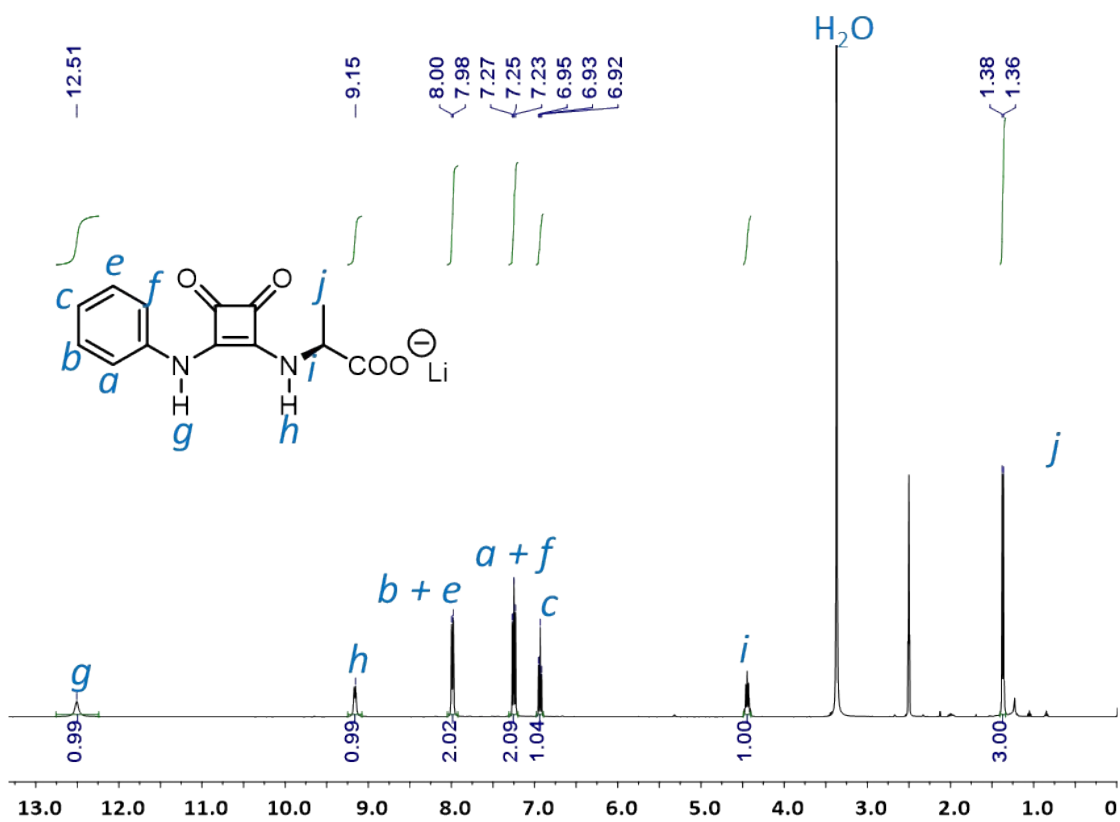

Figure S26.  $^1\text{H}$  NMR spectrum (DMSO- $d_6$ , 400 MHz) of catalyst 11

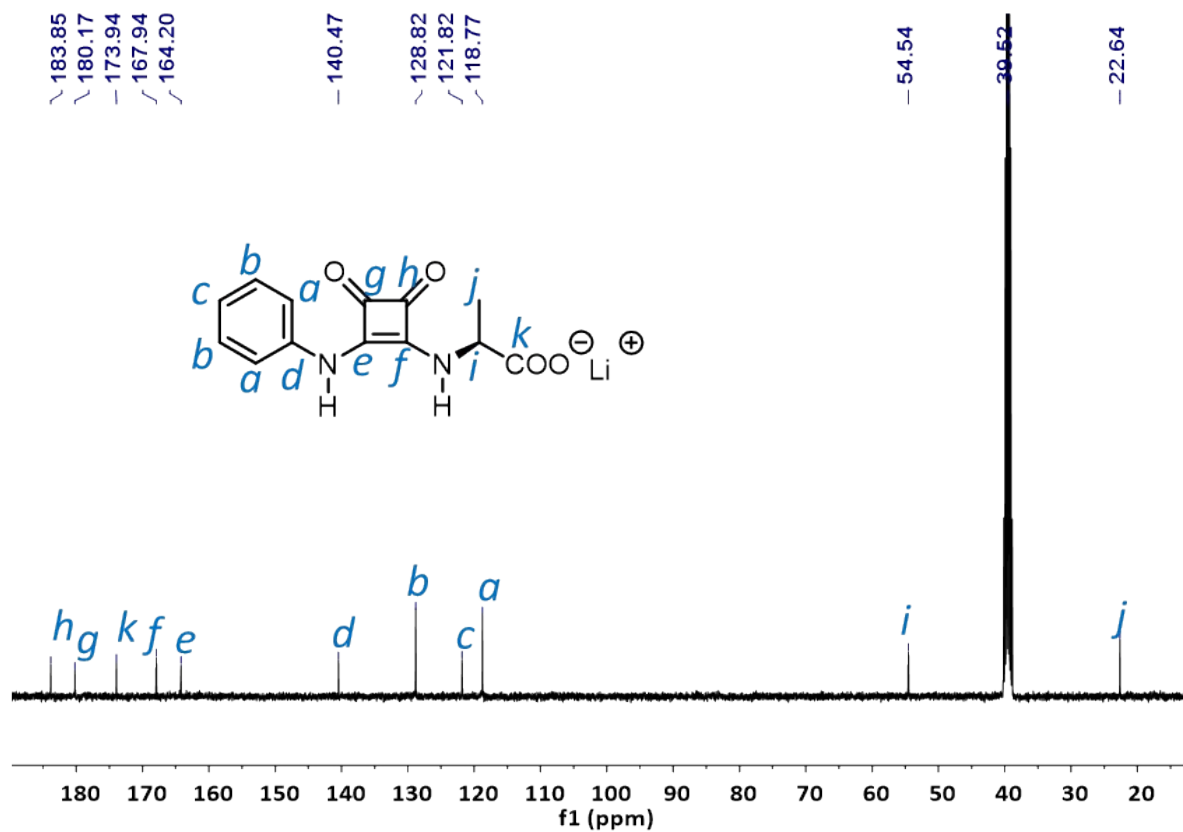

Figure S27.  $^{13}\text{C}$  NMR spectrum (DMSO- $d_6$ , 101 MHz) of catalyst 11

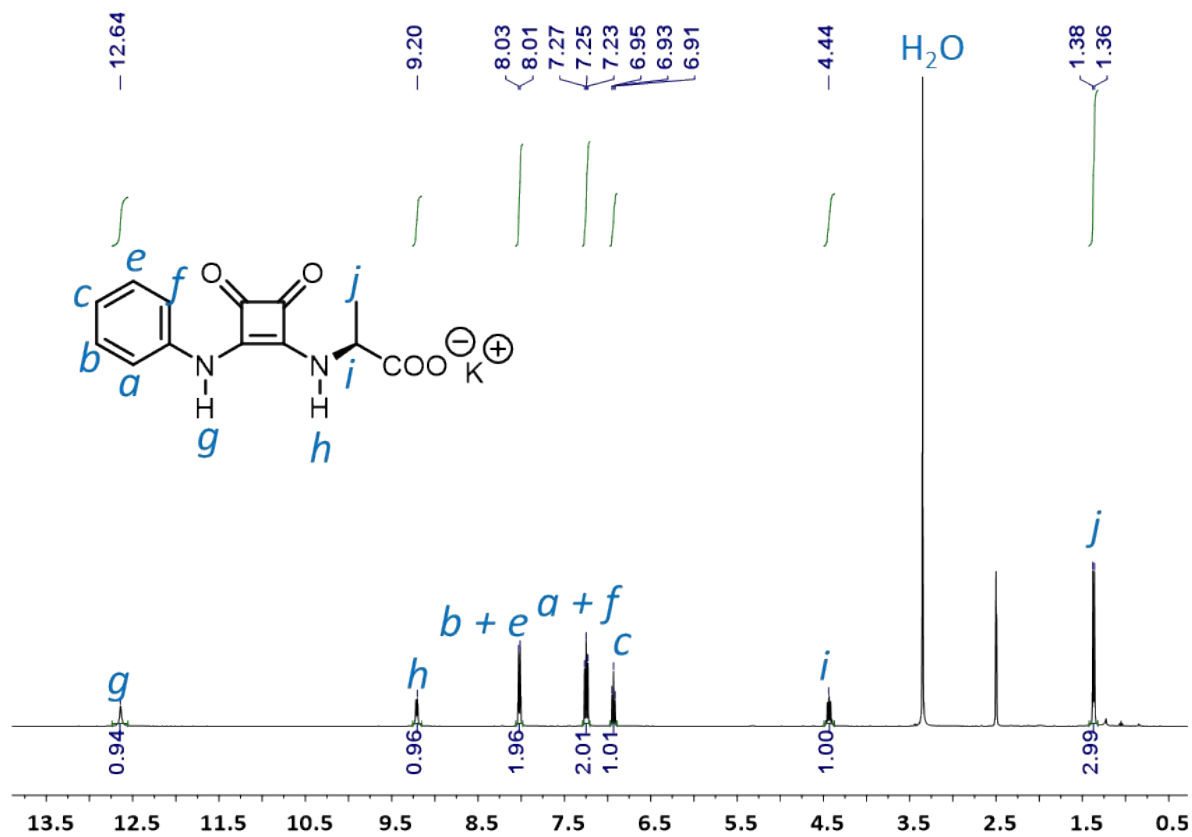

Figure S28.  $^1\text{H}$  NMR spectrum (DMSO- $d_6$ , 400 MHz) of catalyst 12

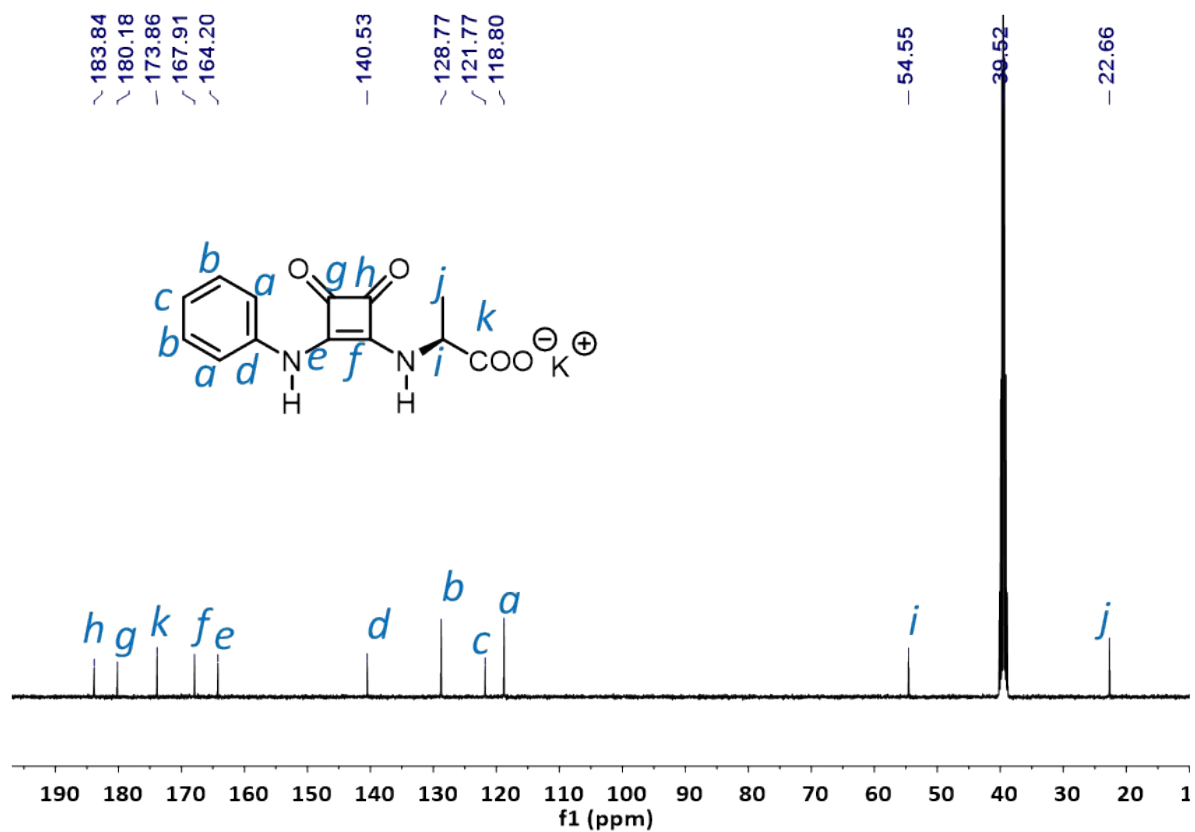

Figure S29.  $^{13}\text{C}$  NMR spectrum (DMSO- $d_6$ , 101 MHz) of catalyst 12

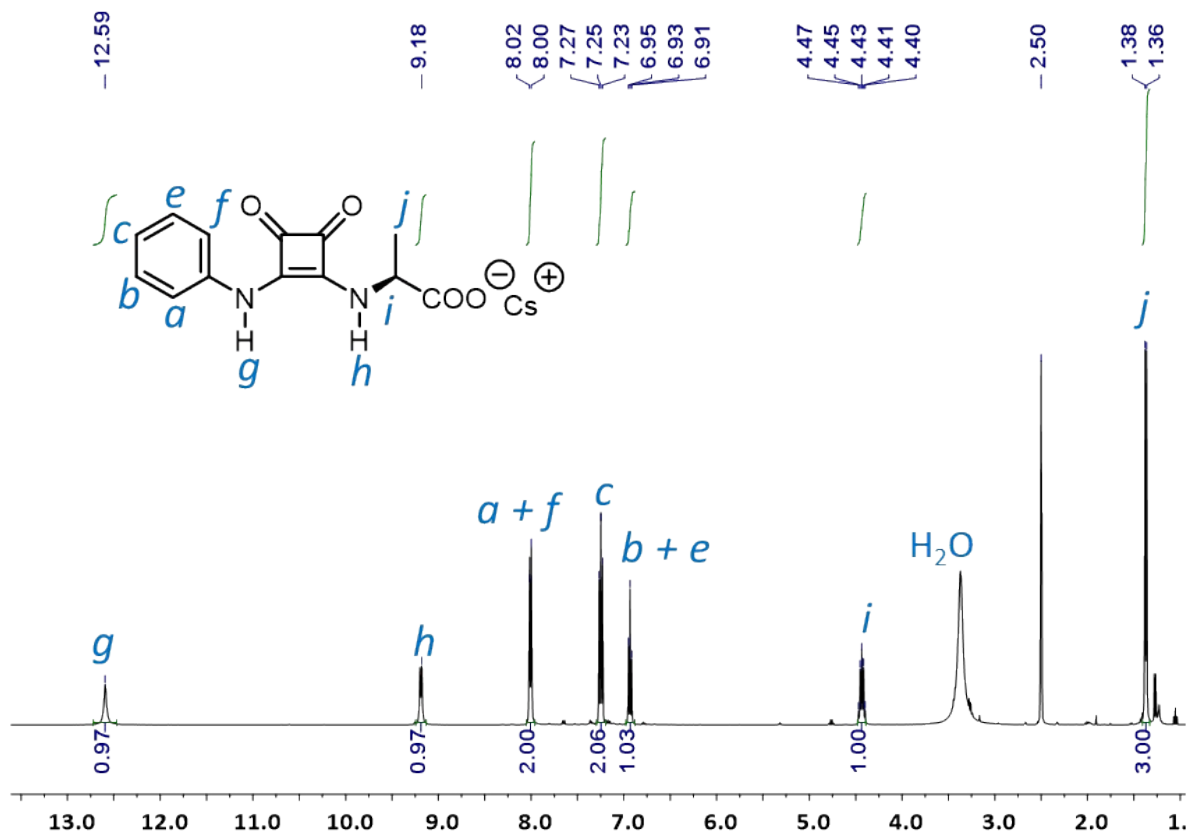

Figure S30.  $^1\text{H}$  NMR spectrum (DMSO- $d_6$ , 400 MHz) of catalyst 13

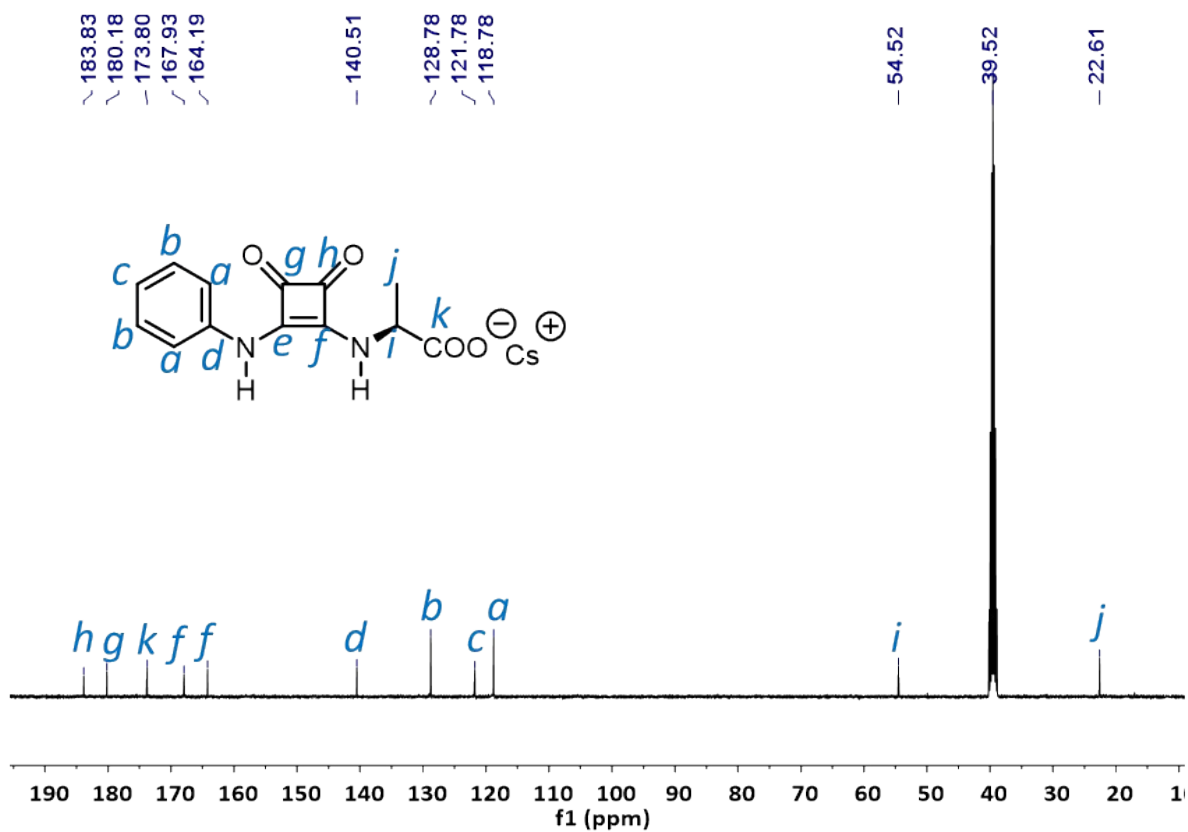

Figure S31.  $^{13}\text{C}$  NMR spectrum (DMSO- $d_6$ , 101 MHz) of catalyst 13

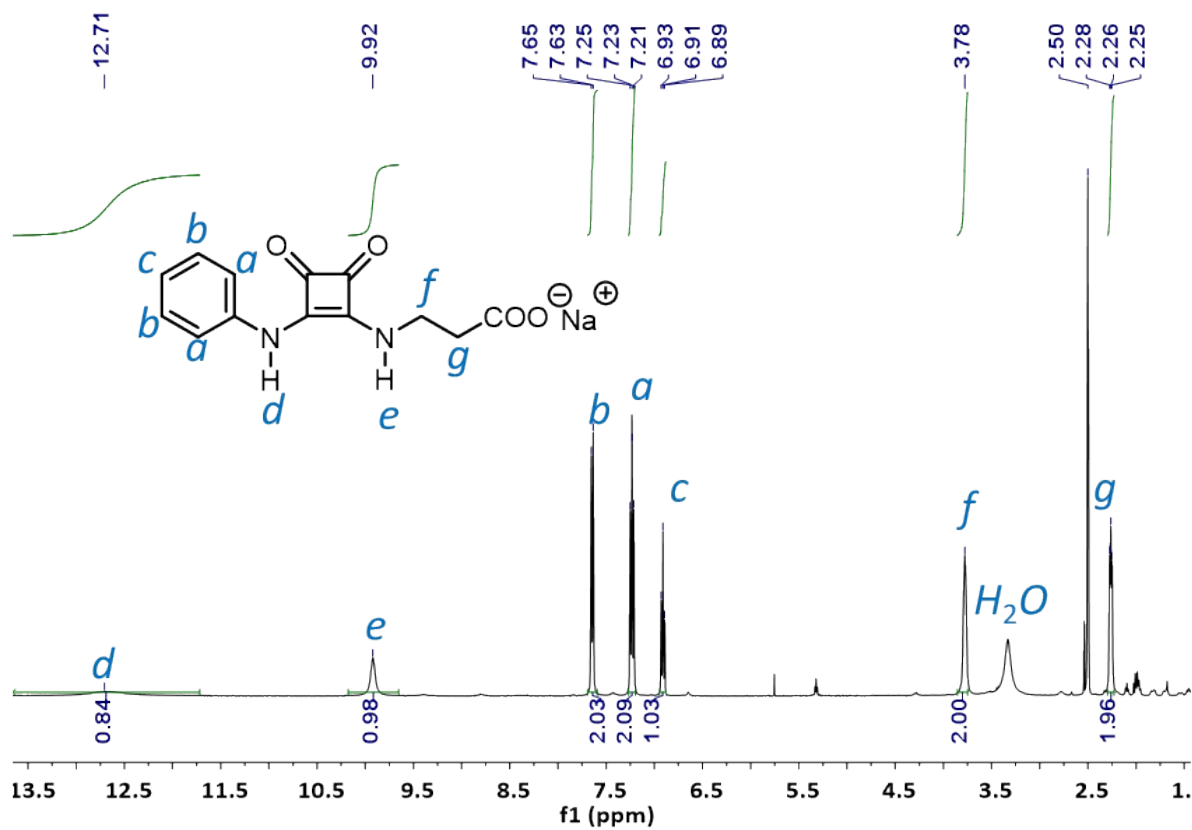

Figure S32.  $^1\text{H}$  NMR spectrum (DMSO- $d_6$ , 400 MHz) of catalyst 14

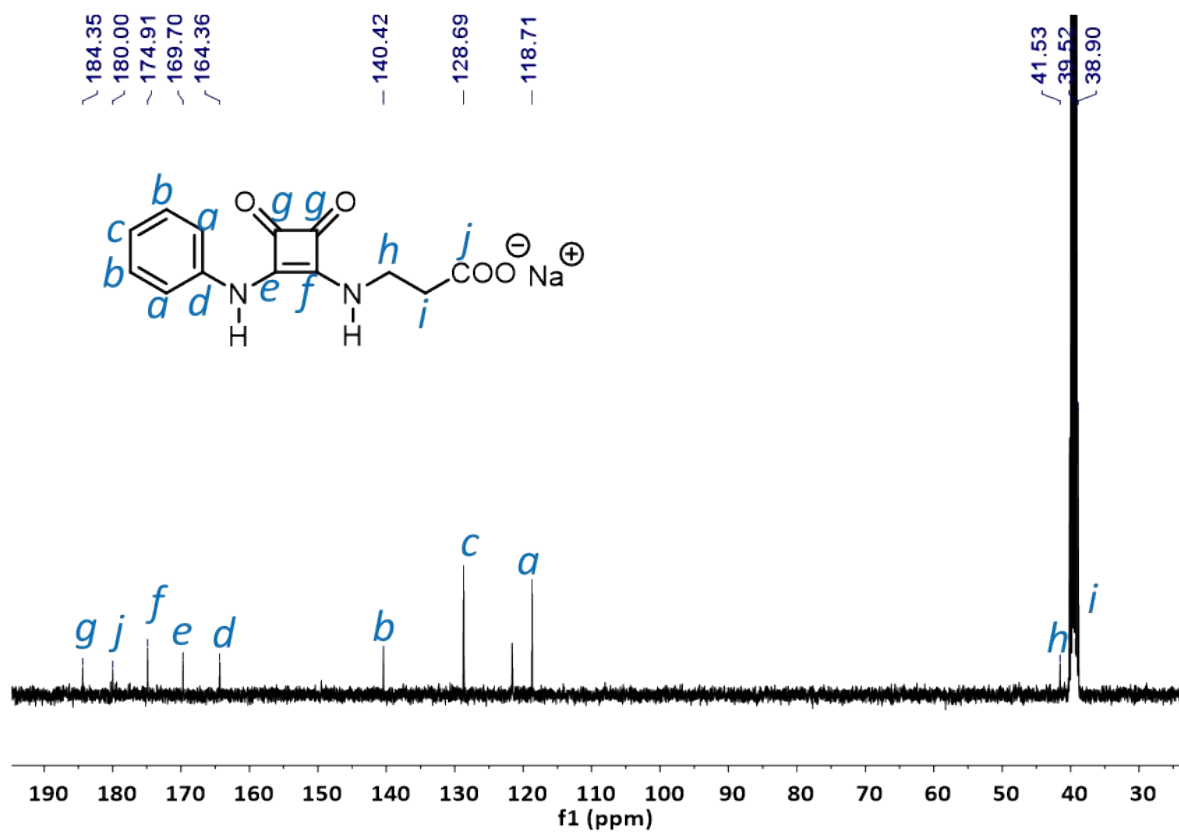

Figure S33.  $^{13}\text{C}$  NMR spectrum (DMSO- $d_6$ , 101 MHz) of catalyst 14

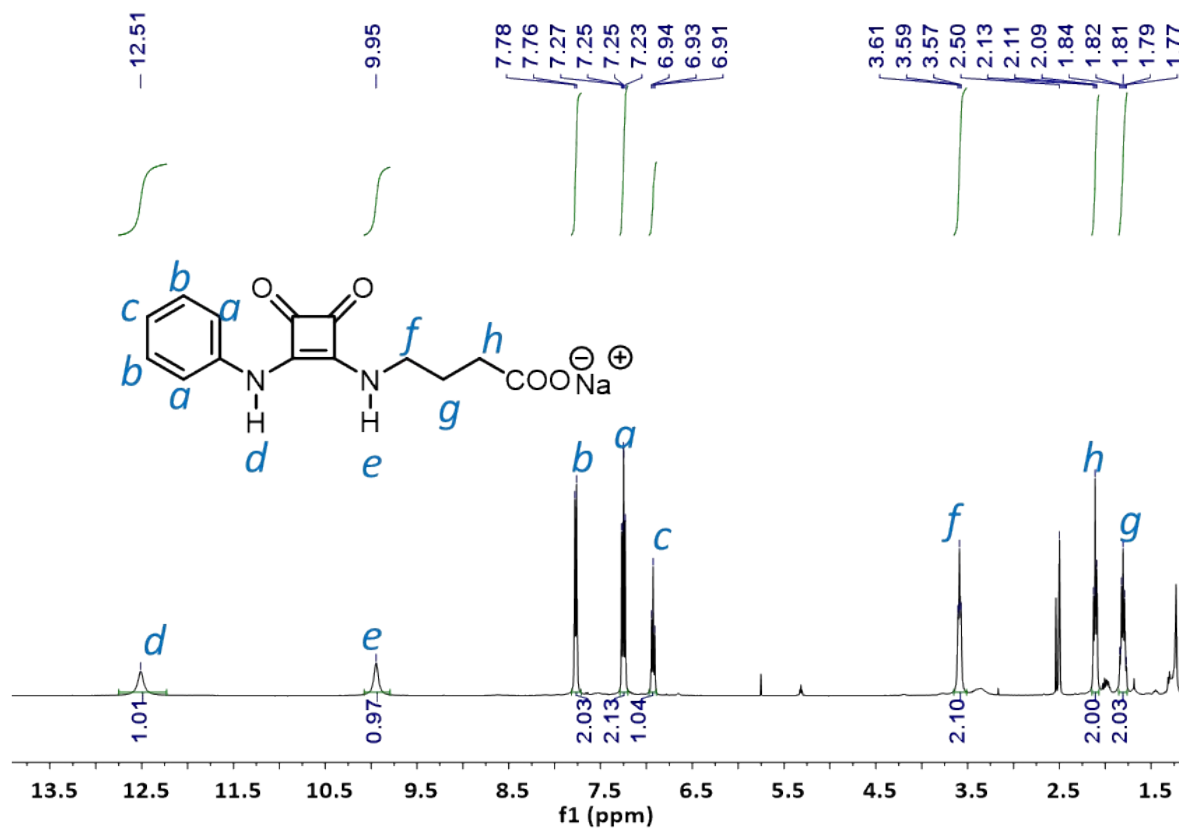

Figure S34.  $^1\text{H}$  NMR spectrum (DMSO- $d_6$ , 400 MHz) of catalyst 15

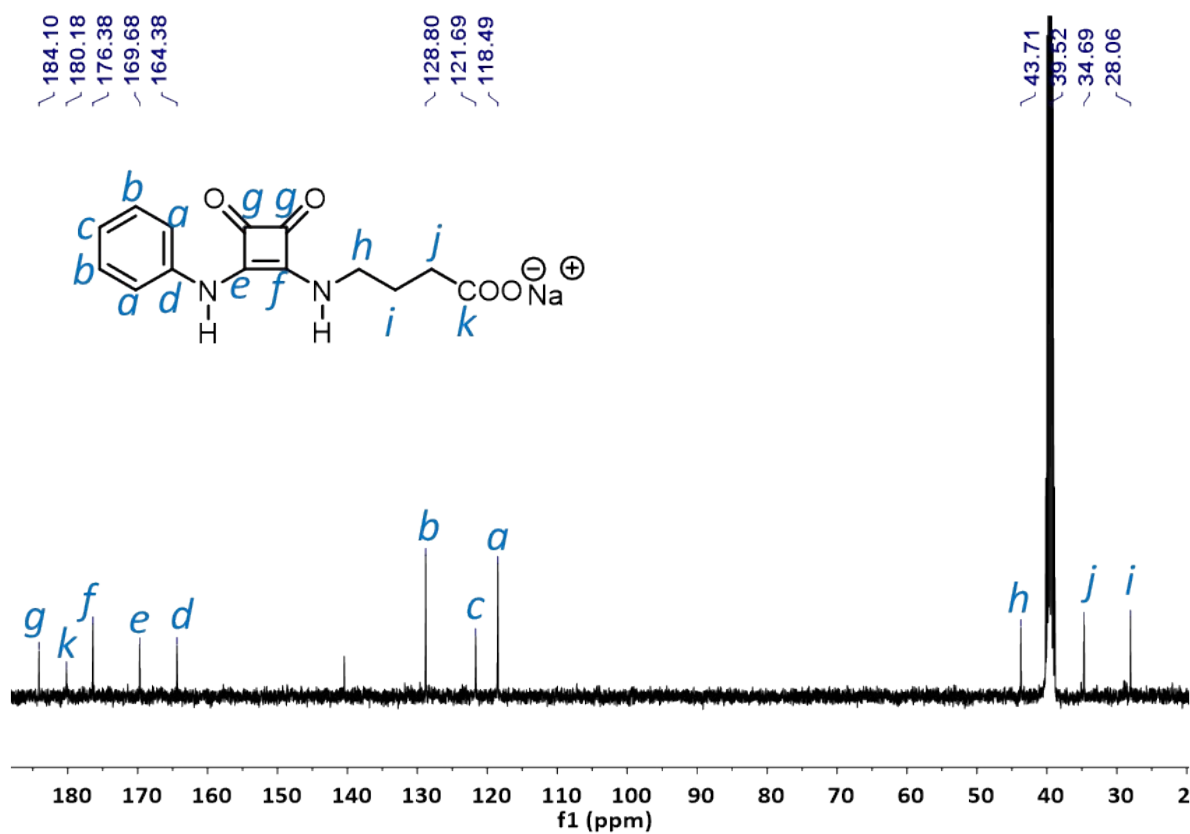

Figure S35. <sup>13</sup>C NMR spectrum (DMSO-*d*<sub>6</sub>, 101 MHz) of catalyst 15

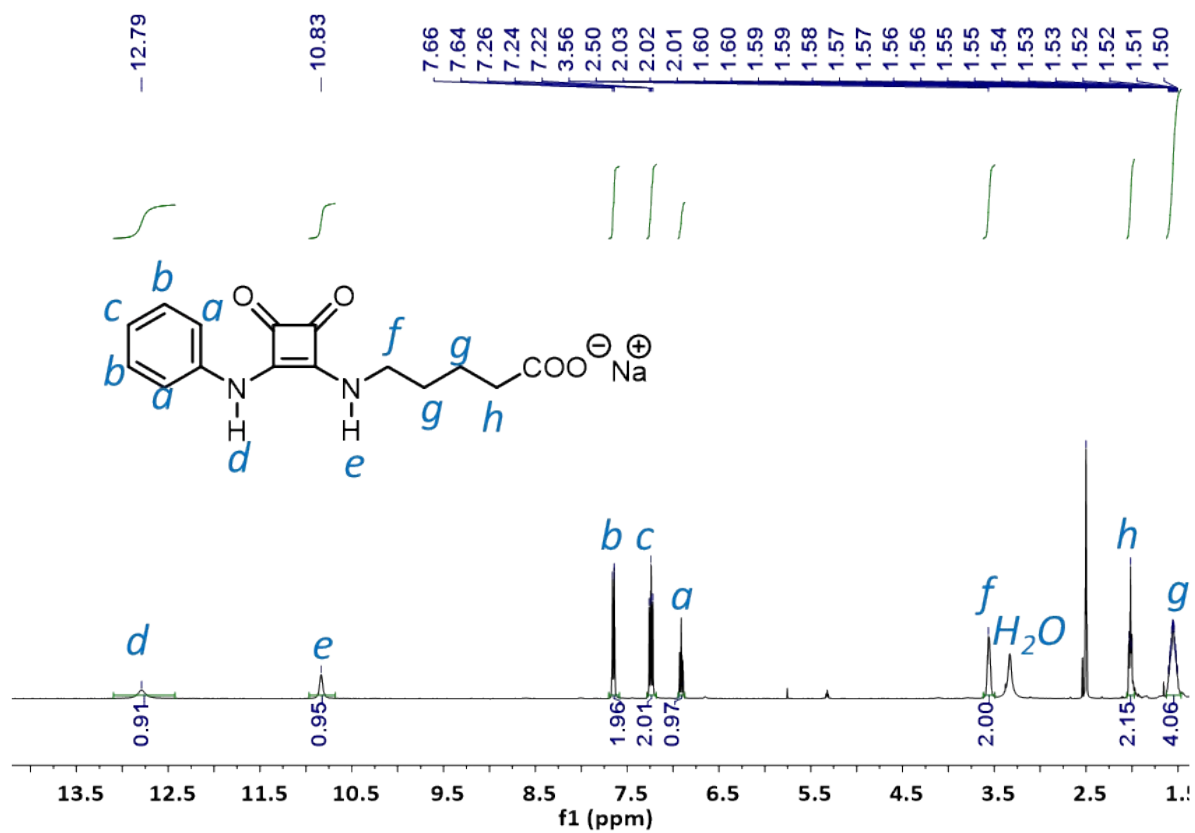

Figure S36. <sup>1</sup>H NMR spectrum (DMSO-*d*<sub>6</sub>, 400 MHz) of catalyst 16

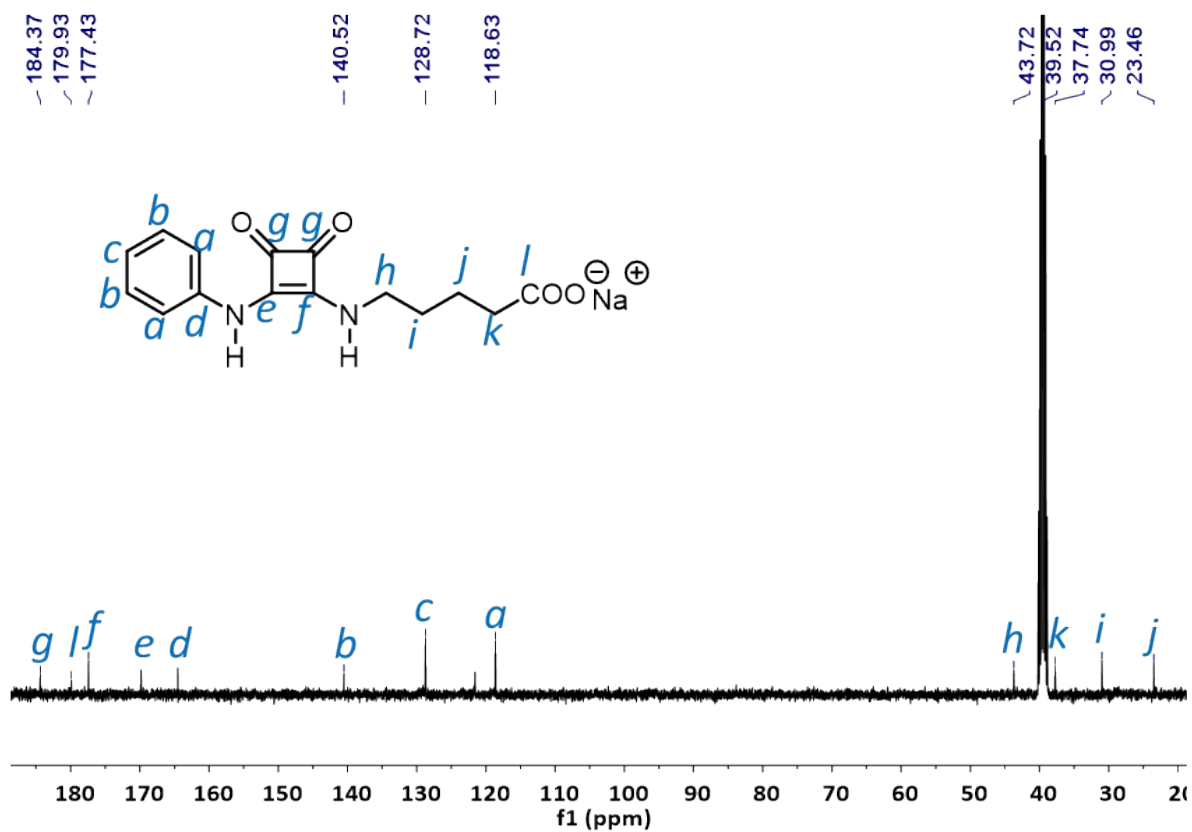

Figure S37. <sup>13</sup>C NMR spectrum (DMSO-d<sub>6</sub>, 101 MHz) of catalyst 16

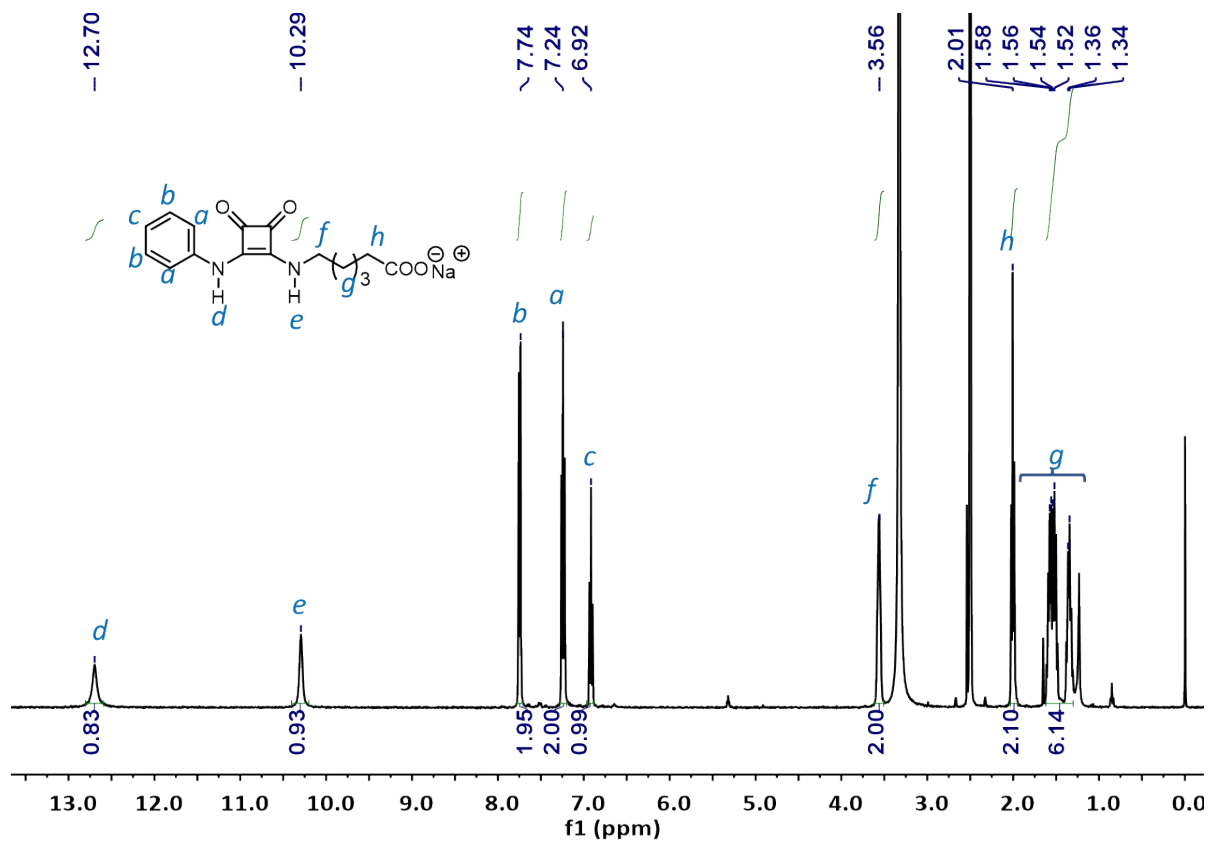

Figure S38. <sup>1</sup>H NMR spectrum (DMSO-d<sub>6</sub>, 400 MHz) of catalyst 17

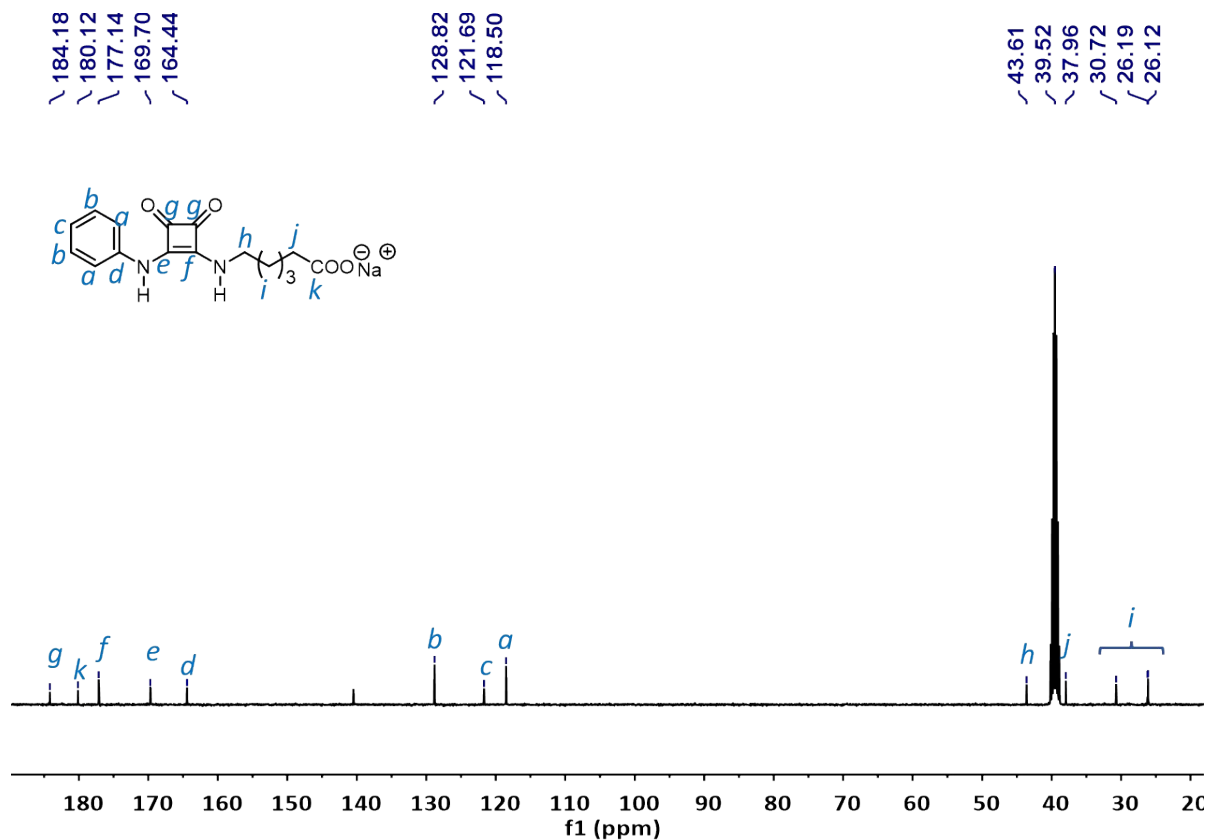

Figure S39.  $^{13}\text{C}$  NMR spectrum (DMSO- $d_6$ , 101 MHz) of catalyst 17

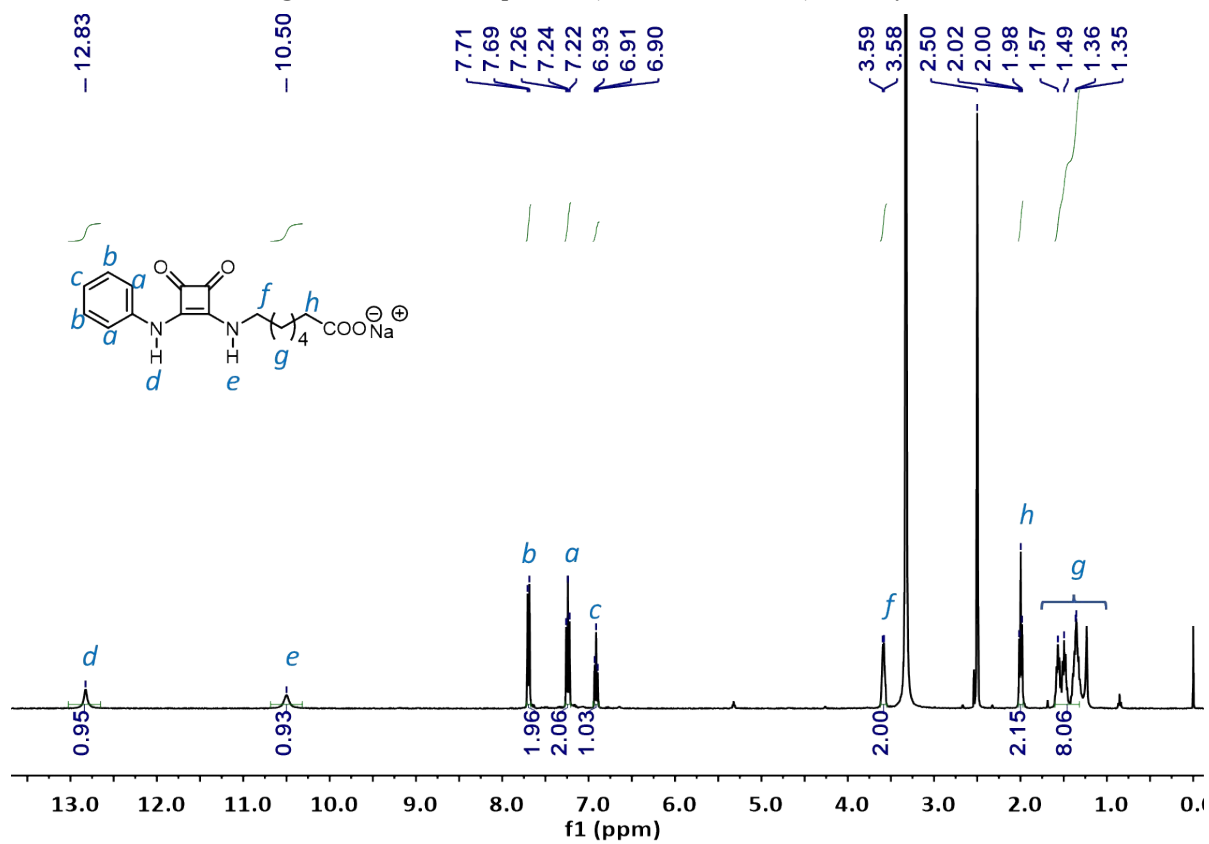

Figure S40.  $^1\text{H}$  NMR spectrum (DMSO- $d_6$ , 400 MHz) of catalyst 18



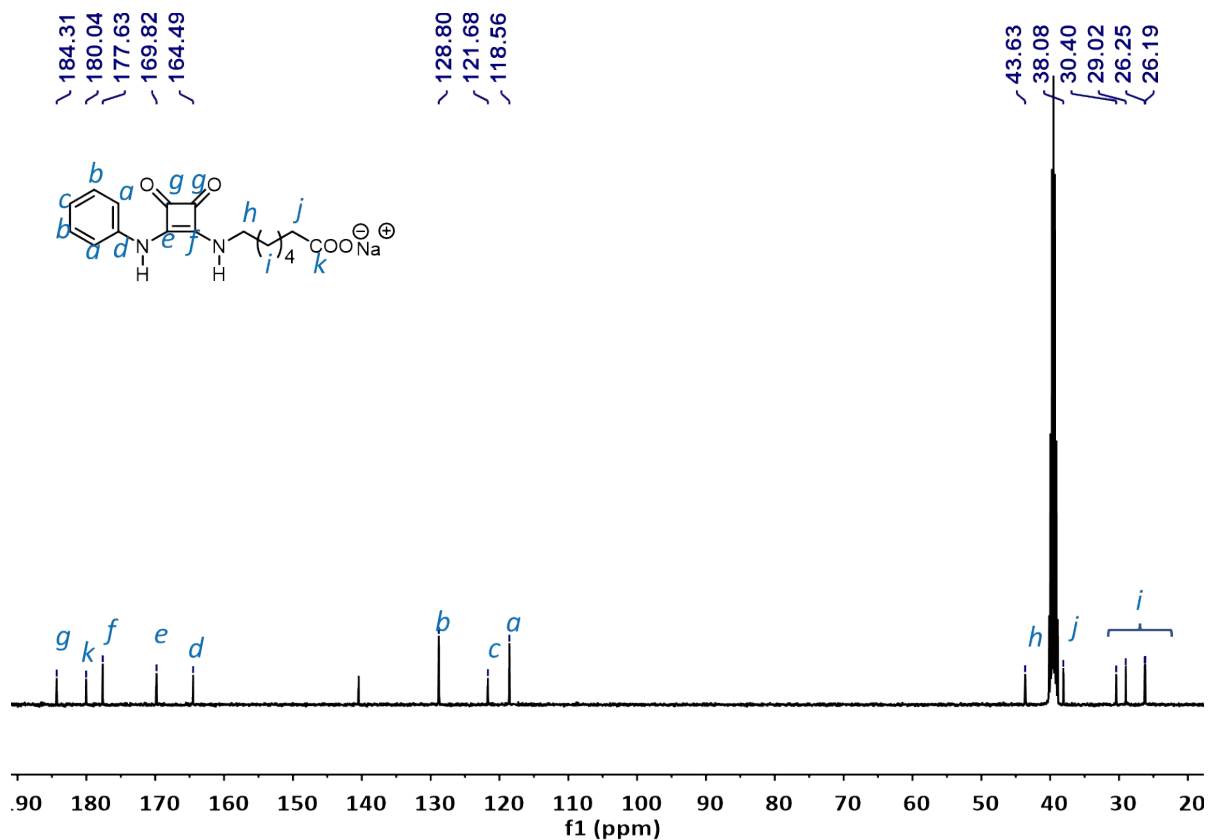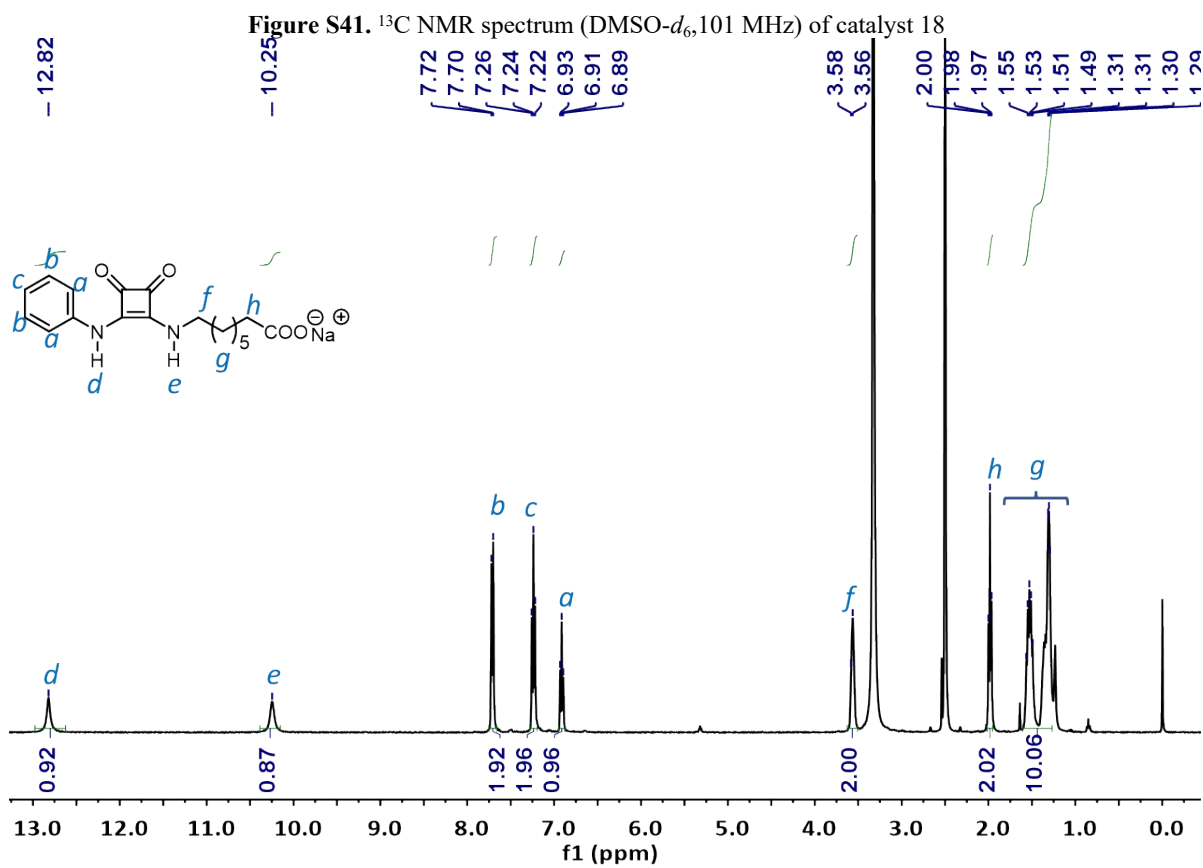

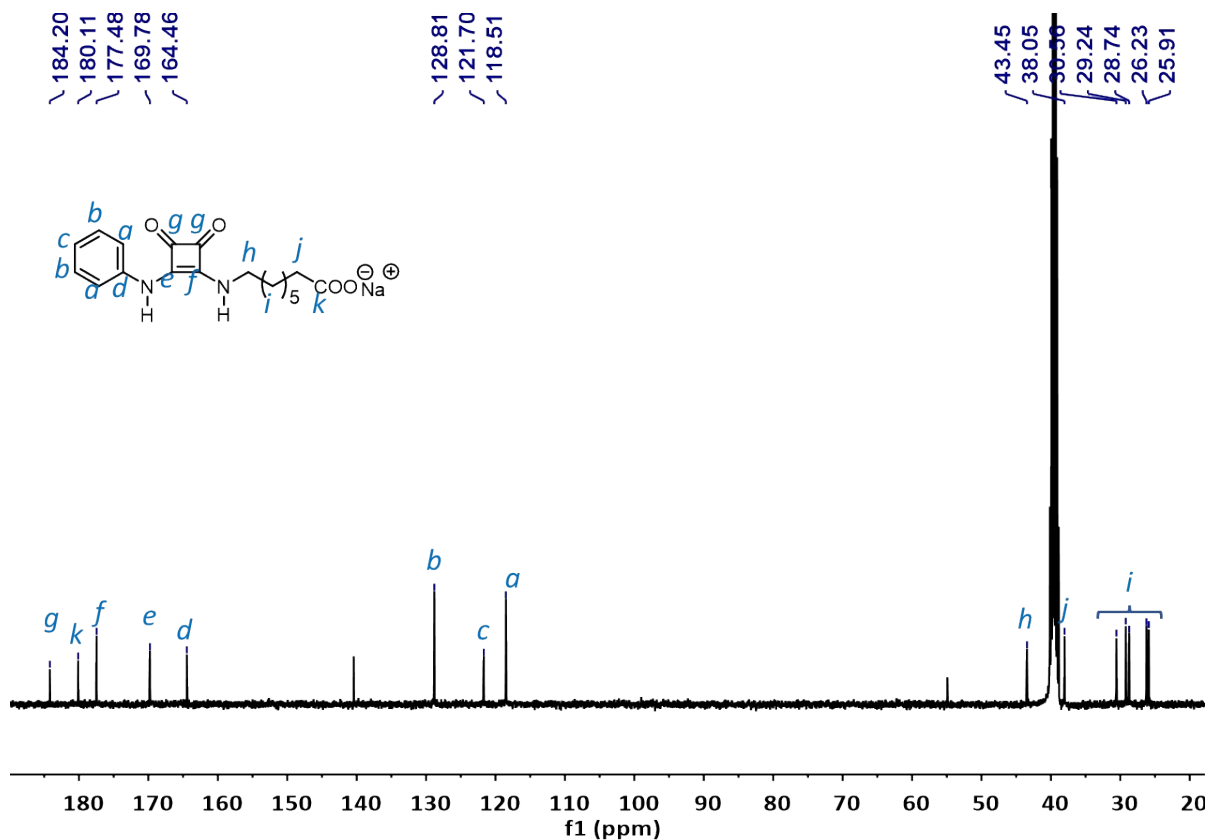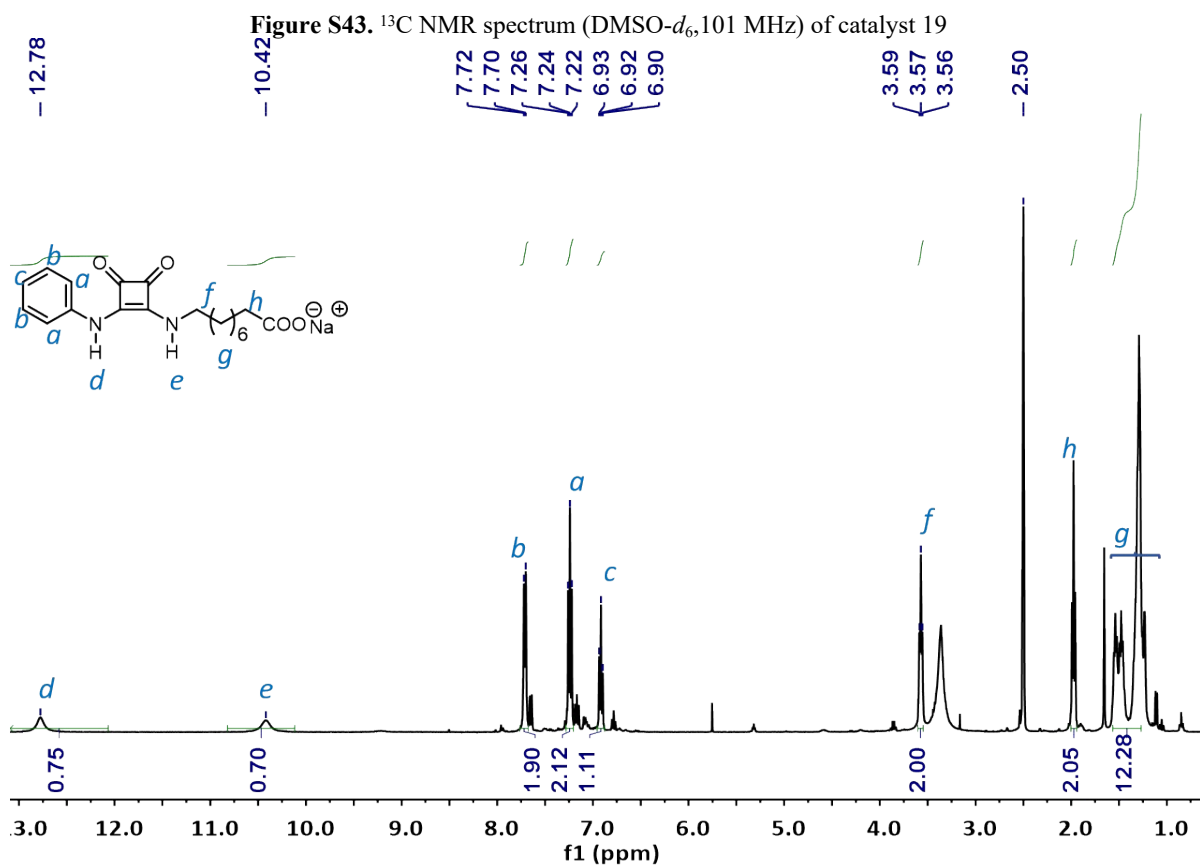

Figure S44. <sup>1</sup>H NMR spectrum (DMSO-*d*<sub>6</sub>, 400 MHz) of catalyst 20

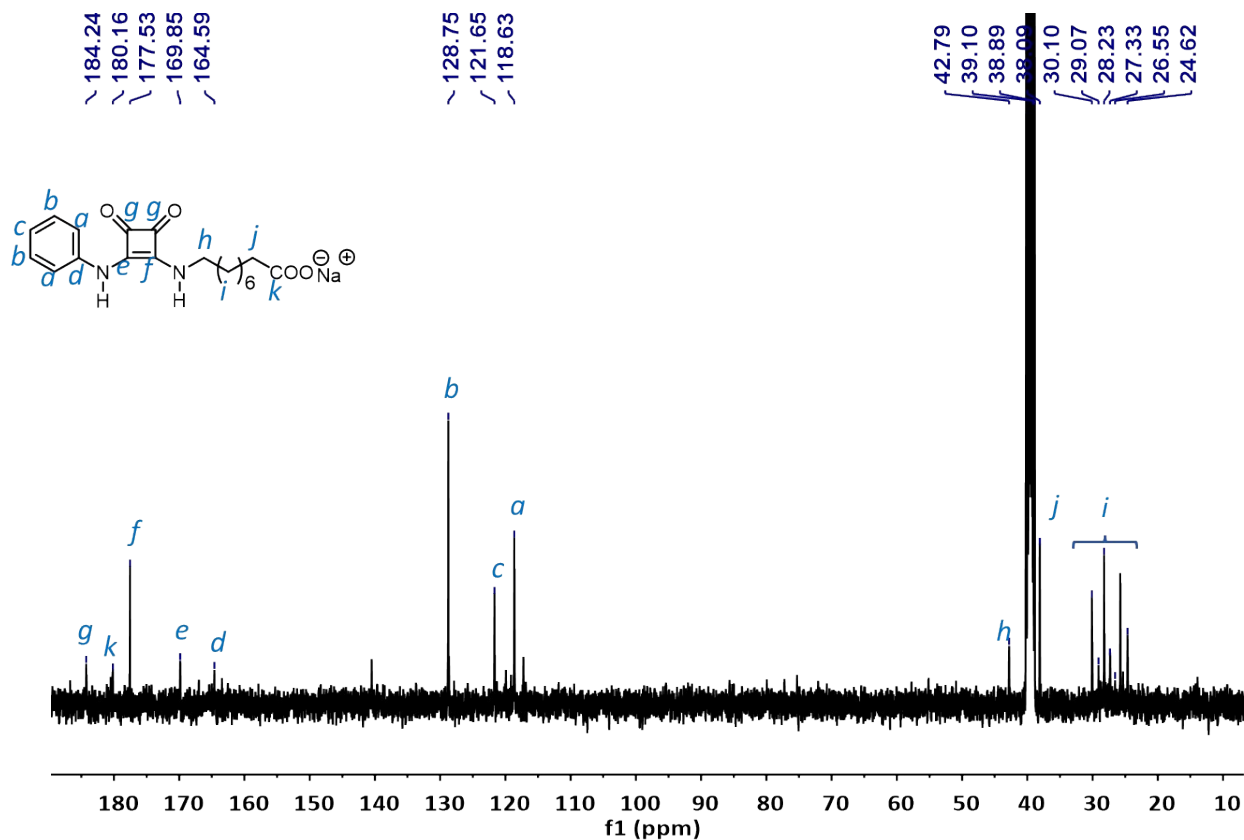

Figure S45.  $^{13}\text{C}$  NMR spectrum (DMSO- $d_6$ , 101 MHz) of catalyst 20

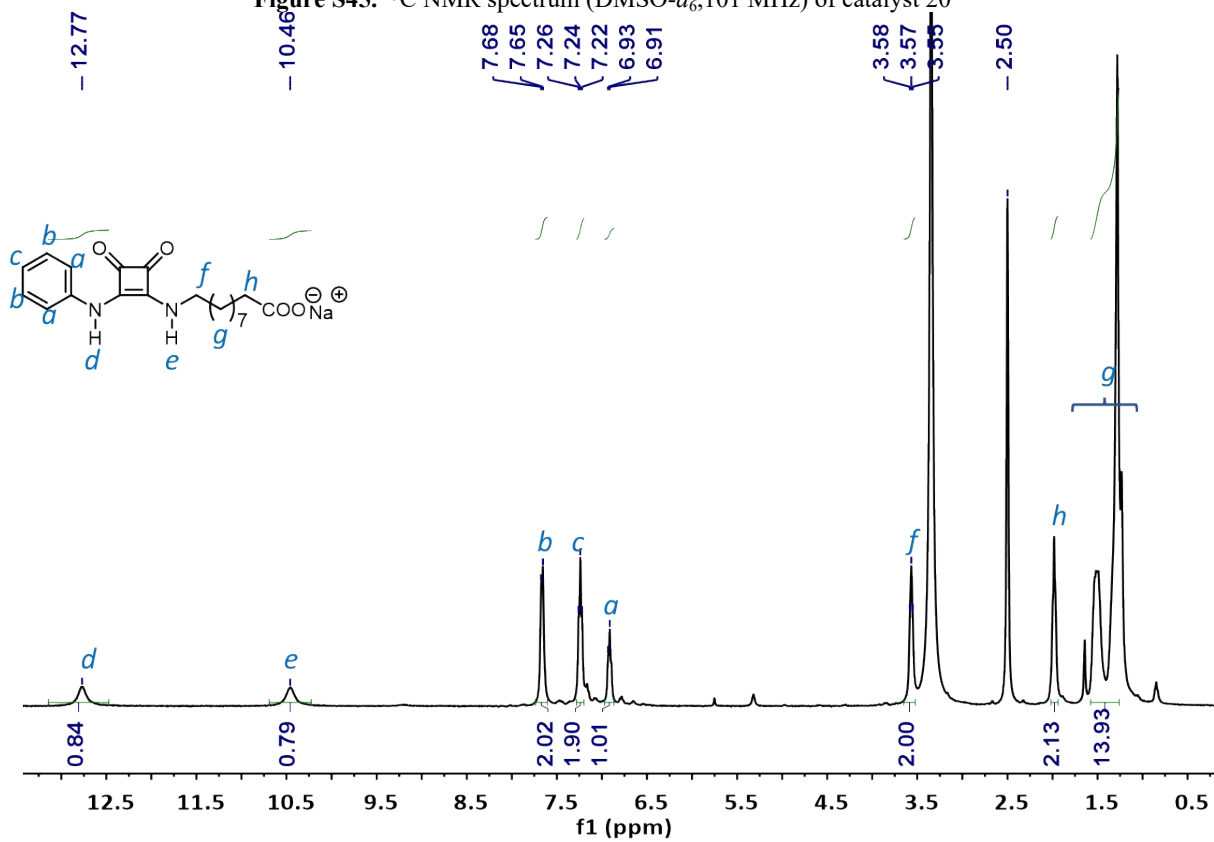

Figure S46.  $^1\text{H}$  NMR spectrum (DMSO- $d_6$ , 400 MHz) of catalyst 21

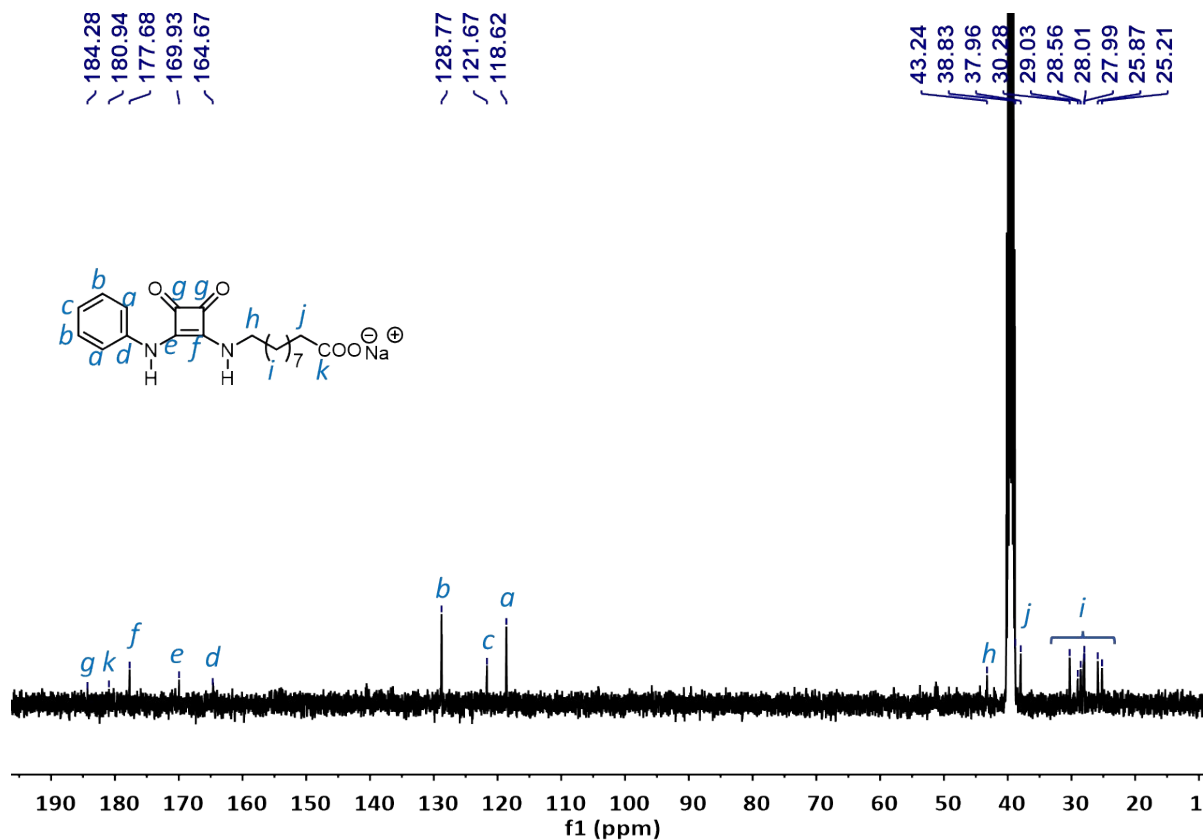

Figure S47.  $^{13}\text{C}$  NMR spectrum (DMSO- $d_6$ , 101 MHz) of catalyst 21

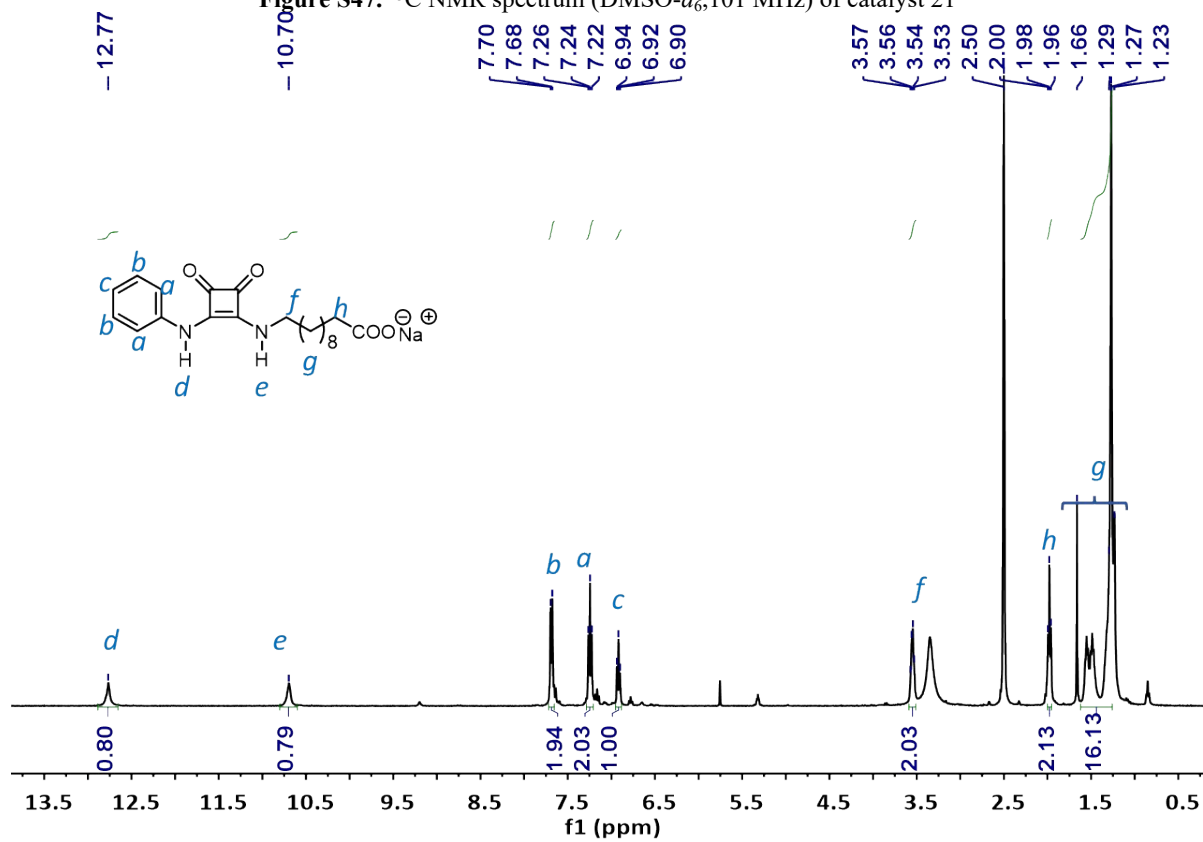

Figure S48.  $^1\text{H}$  NMR spectrum (DMSO- $d_6$ , 400 MHz) of catalyst 22

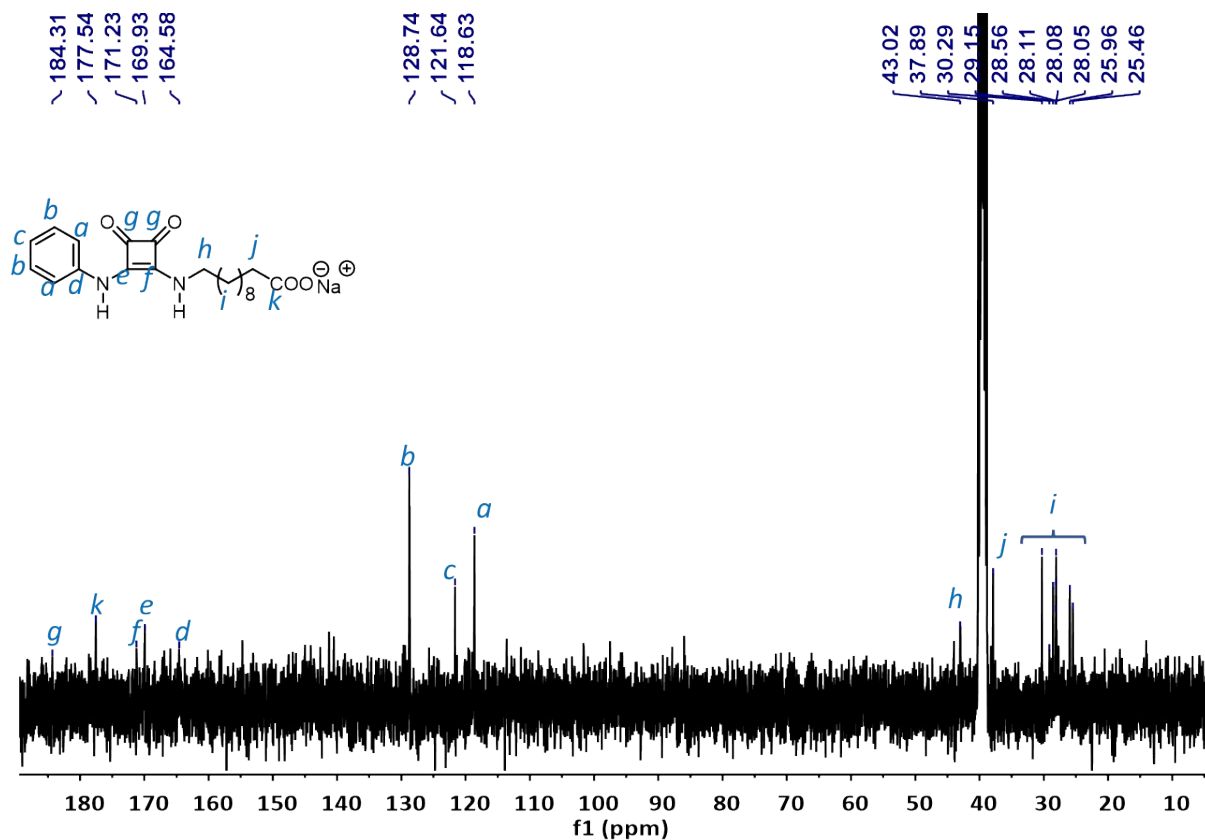

Figure S49.  $^{13}\text{C}$  NMR spectrum (DMSO- $d_6$ , 101 MHz) of catalyst 22

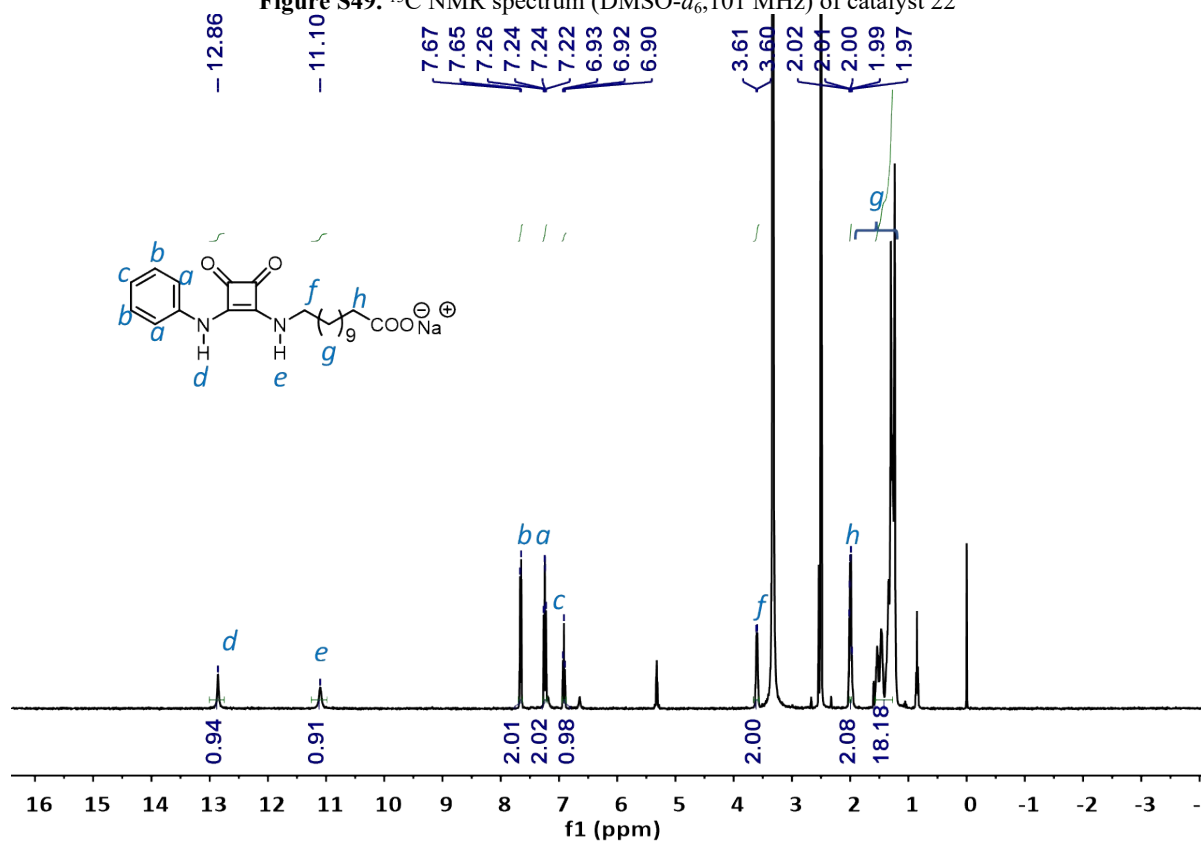

Figure S50.  $^1\text{H}$  NMR spectrum (DMSO- $d_6$ , 400 MHz) of catalyst 23

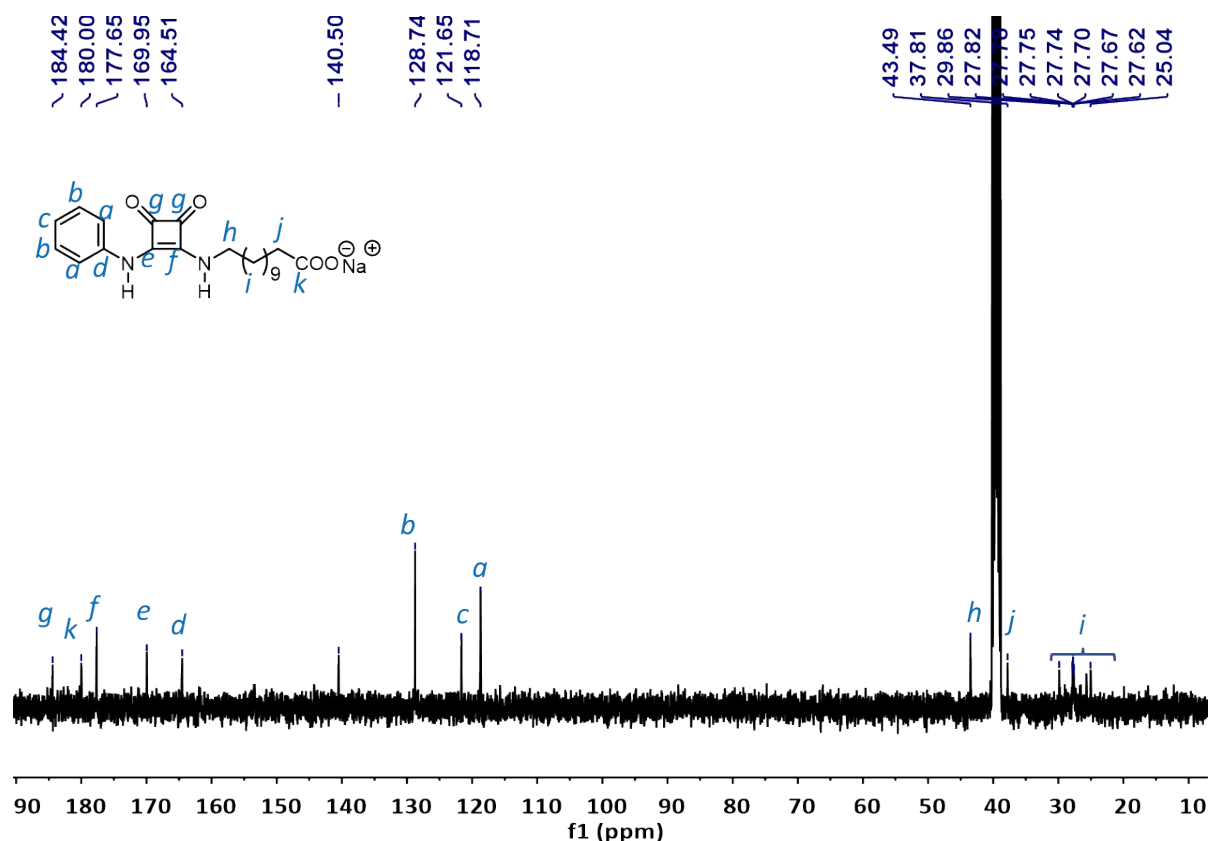

Figure S51.  $^{13}\text{C}$  NMR spectrum (DMSO- $d_6$ , 101 MHz) of catalyst 23

## Computational Methods

Geometry optimizations of structures, binding energy of complexes were performed using Gaussian 16 program<sup>3</sup>, the structures were illustrated by CYLview<sup>4</sup>. the structures were optimized at B3LYP//Def2TZVP and single-point energy were obtained on optimized structures with B3LYP/SDD. The physical descriptors were withdrawn by the Multiwfn program<sup>5</sup>.

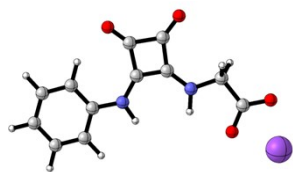

01

|   |             |             |             |
|---|-------------|-------------|-------------|
| C | -1.12488400 | 2.16796400  | -0.00056900 |
| C | 0.38183400  | 2.45435400  | 0.00041500  |
| O | -2.14000300 | 2.84018900  | -0.00151500 |
| O | 1.10265000  | 3.43413600  | 0.00073700  |
| C | -0.77711200 | 0.71790200  | 0.00018200  |
| C | 0.60215500  | 0.98744100  | 0.00065400  |
| N | -1.41043700 | -0.48617700 | -0.00008600 |
| H | -0.80538900 | -1.29738300 | 0.00164100  |

|    |             |             |             |
|----|-------------|-------------|-------------|
| N  | 1.69897400  | 0.22444000  | 0.00174100  |
| H  | 1.66186500  | -0.79119200 | 0.00031500  |
| C  | 4.05186800  | -0.42638000 | -0.00006200 |
| O  | 3.58485900  | -1.61383500 | -0.00068400 |
| O  | 5.28355600  | -0.14649000 | 0.00010800  |
| Na | 5.69888200  | -2.31410100 | -0.00075300 |
| C  | 3.06392600  | 0.73942100  | 0.00027500  |
| H  | 3.25841300  | 1.36314000  | 0.87920800  |
| H  | 3.25702100  | 1.36203900  | -0.87980900 |
| C  | -2.78683600 | -0.79983200 | 0.00001700  |
| C  | -3.79162800 | 0.17812300  | -0.00040800 |
| C  | -3.13741800 | -2.16040200 | 0.00039300  |
| C  | -5.12962200 | -0.22089000 | -0.00040000 |
| H  | -3.53287800 | 1.23205800  | -0.00087600 |
| C  | -4.47828700 | -2.54084900 | 0.00046200  |
| H  | -2.35917600 | -2.92096000 | 0.00057300  |
| C  | -5.48596500 | -1.57234100 | 0.00008600  |
| H  | -5.90084500 | 0.54398500  | -0.00072900 |
| H  | -4.73233500 | -3.59691000 | 0.00080600  |
| H  | -6.53082700 | -1.86657700 | 0.00014100  |

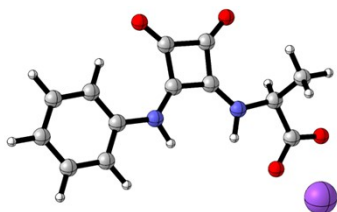

02

|   |             |             |             |
|---|-------------|-------------|-------------|
| C | -1.23975100 | 2.12698600  | -0.22962900 |
| C | 0.27069400  | 2.38201300  | -0.20033300 |
| O | -2.23640900 | 2.81356800  | -0.36646500 |
| O | 1.01132700  | 3.34360300  | -0.29165600 |
| C | -0.92877200 | 0.68429300  | -0.02778700 |
| C | 0.45732200  | 0.92214900  | -0.00585400 |
| N | -1.59033400 | -0.49611400 | 0.10949600  |
| H | -1.00637200 | -1.30680900 | 0.27117200  |
| N | 1.52474900  | 0.13065200  | 0.13379300  |
| H | 1.44611500  | -0.88314000 | 0.15242300  |
| C | 2.91912900  | 0.58423500  | 0.08094400  |
| H | 3.06091300  | 1.22733900  | -0.79498400 |
| C | 3.33503700  | 1.36905500  | 1.33583900  |
| H | 3.19074500  | 0.76219000  | 2.23617800  |
| H | 4.38931800  | 1.64579300  | 1.25814700  |
| H | 2.73816800  | 2.28052900  | 1.41678900  |
| C | 3.80707100  | -0.65510600 | -0.11467400 |
| O | 3.26078000  | -1.80877500 | -0.06946700 |

|    |             |             |             |
|----|-------------|-------------|-------------|
| O  | 5.04239800  | -0.46692500 | -0.30234300 |
| Na | 5.28126600  | -2.65490700 | -0.44934300 |
| C  | -2.97185600 | -0.78362900 | 0.07350100  |
| C  | -3.94945200 | 0.19954100  | -0.13576000 |
| C  | -3.35655400 | -2.12253400 | 0.25611900  |
| C  | -5.29489000 | -0.17277200 | -0.15913300 |
| H  | -3.66421000 | 1.23745700  | -0.27444500 |
| C  | -4.70442500 | -2.47647000 | 0.22957700  |
| H  | -2.59941100 | -2.88684500 | 0.41936400  |
| C  | -5.68512100 | -1.50271300 | 0.02103800  |
| H  | -6.04496400 | 0.59594500  | -0.32130300 |
| H  | -4.98512000 | -3.51597300 | 0.37264000  |
| H  | -6.73537500 | -1.77631900 | 0.00013200  |

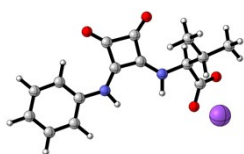

**03**

|    |             |             |             |
|----|-------------|-------------|-------------|
| C  | -1.39539300 | 1.88468000  | -0.87836700 |
| C  | 0.13001700  | 2.02617300  | -0.83798600 |
| O  | -2.32097100 | 2.54982700  | -1.30733600 |
| O  | 0.95688700  | 2.84205200  | -1.20109600 |
| C  | -1.22217700 | 0.58013900  | -0.17931700 |
| C  | 0.17750300  | 0.71066400  | -0.15184800 |
| N  | -1.99153400 | -0.42932000 | 0.30967700  |
| H  | -1.48992500 | -1.16620700 | 0.78914900  |
| N  | 1.16499000  | -0.05349400 | 0.32867300  |
| H  | 0.99080300  | -1.02450800 | 0.57485400  |
| C  | 2.59565000  | 0.22107500  | 0.12680900  |
| H  | 2.69932700  | 0.99233300  | -0.64063900 |
| C  | 3.27680000  | 0.71984400  | 1.43869600  |
| H  | 3.20452700  | -0.10082200 | 2.16791400  |
| C  | 3.23638800  | -1.08220400 | -0.38328100 |
| O  | 2.68807000  | -2.18219200 | -0.03256100 |
| O  | 4.27137100  | -1.01176900 | -1.10509400 |
| Na | 4.23098500  | -3.21425400 | -1.25061900 |
| C  | -3.39034300 | -0.61619300 | 0.27655000  |
| C  | -4.26572900 | 0.29135800  | -0.33674700 |
| C  | -3.90085300 | -1.77309700 | 0.88886800  |
| C  | -5.63664200 | 0.02701500  | -0.32698100 |
| H  | -3.88321400 | 1.19113100  | -0.80783300 |
| C  | -5.27240000 | -2.02139400 | 0.88887600  |
| H  | -3.22327000 | -2.47802700 | 1.36639800  |
| C  | -6.15176900 | -1.12200200 | 0.27956900  |



|   |             |             |             |
|---|-------------|-------------|-------------|
| H | -6.30703600 | 0.73660000  | -0.80330500 |
| H | -5.65100600 | -2.92002400 | 1.36732800  |
| H | -7.22027200 | -1.31335200 | 0.27895700  |
| C | 2.53768700  | 1.94038900  | 2.00914400  |
| H | 2.53796200  | 2.76921900  | 1.29225200  |
| H | 1.49847400  | 1.70937800  | 2.25920700  |
| H | 3.03183300  | 2.28305300  | 2.92472600  |
| C | 4.76132700  | 1.05189000  | 1.21822800  |
| H | 5.21243900  | 1.38069400  | 2.16078500  |
| H | 5.32907100  | 0.19788800  | 0.84187600  |
| H | 4.87200300  | 1.86578400  | 0.49212300  |

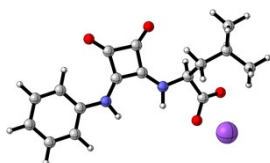

**04**

|    |             |             |             |
|----|-------------|-------------|-------------|
| C  | -1.75399900 | 1.93540500  | -0.75325900 |
| C  | -0.22820900 | 1.97853500  | -0.88542900 |
| O  | -2.66882100 | 2.71175600  | -0.96282800 |
| O  | 0.61314200  | 2.78653500  | -1.23340400 |
| C  | -1.60175400 | 0.53497600  | -0.26845700 |
| C  | -0.20126900 | 0.57943400  | -0.39058300 |
| N  | -2.38545600 | -0.49008600 | 0.16213600  |
| H  | -1.89174400 | -1.32601700 | 0.44807900  |
| N  | 0.77689500  | -0.30206700 | -0.16816800 |
| H  | 0.59326200  | -1.25104500 | 0.14492400  |
| C  | 2.20897500  | -0.02047800 | -0.34002100 |
| H  | 2.35110900  | 0.56931200  | -1.24949200 |
| C  | 2.90805300  | -1.37374100 | -0.53461900 |
| O  | 2.34144700  | -2.41159100 | -0.05132900 |
| O  | 4.01009700  | -1.39748700 | -1.15331700 |
| Na | 4.04033300  | -3.58792900 | -0.86851200 |
| C  | -3.78865400 | -0.58449200 | 0.28354000  |
| C  | -4.65562800 | 0.46071000  | -0.06574100 |
| C  | -4.31321100 | -1.79093800 | 0.77683900  |
| C  | -6.03216300 | 0.28199300  | 0.08447400  |
| H  | -4.26152900 | 1.39844800  | -0.44413000 |
| C  | -5.69025800 | -1.95230900 | 0.91981400  |
| H  | -3.64199800 | -2.60283700 | 1.04960600  |
| C  | -6.56133200 | -0.91548300 | 0.57387300  |
| H  | -6.69573400 | 1.09767700  | -0.18784500 |
| H  | -6.07962000 | -2.89111500 | 1.30302200  |
| H  | -7.63405300 | -1.03907100 | 0.68484600  |
| C  | 4.22236100  | 1.27055400  | 0.76994500  |

|   |            |             |             |
|---|------------|-------------|-------------|
| H | 4.49378100 | 1.32952100  | -0.29217000 |
| C | 2.75115600 | 0.79390700  | 0.86457600  |
| H | 2.59541200 | 0.21067700  | 1.78236100  |
| H | 2.09773600 | 1.67009100  | 0.93245600  |
| C | 4.36392200 | 2.67882400  | 1.37218600  |
| H | 5.40074600 | 3.02963300  | 1.31418400  |
| H | 3.73196000 | 3.40112300  | 0.84492600  |
| H | 4.07072500 | 2.68437100  | 2.43018100  |
| C | 5.19910200 | 0.29824100  | 1.45209400  |
| H | 4.98592400 | 0.22639300  | 2.52677700  |
| H | 5.13747800 | -0.70348300 | 1.01865800  |
| H | 6.23334200 | 0.64407800  | 1.34109200  |

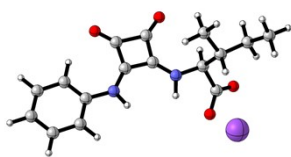

**05**

|    |             |             |             |
|----|-------------|-------------|-------------|
| C  | 1.64592600  | -1.79975800 | -1.05749500 |
| C  | 0.11668600  | -1.88327000 | -1.10926800 |
| O  | 2.56993500  | -2.46729300 | -1.48628800 |
| O  | -0.71712400 | -2.63695900 | -1.57629400 |
| C  | 1.48023400  | -0.54575400 | -0.26992200 |
| C  | 0.07736000  | -0.62221700 | -0.32719900 |
| N  | 2.25634200  | 0.39202200  | 0.33700600  |
| H  | 1.75506700  | 1.11134300  | 0.84276700  |
| N  | -0.90766400 | 0.14211000  | 0.15692300  |
| H  | -0.71362900 | 1.08020600  | 0.49744900  |
| C  | -2.33430000 | -0.06075500 | -0.13693200 |
| H  | -2.42138500 | -0.75702600 | -0.97477700 |
| C  | -2.89728700 | 1.30887600  | -0.55951900 |
| O  | -2.33297900 | 2.34866400  | -0.07607100 |
| O  | -3.88776100 | 1.34951600  | -1.34422800 |
| Na | -3.76350500 | 3.55251200  | -1.27242400 |
| C  | 3.66061500  | 0.52323300  | 0.39567500  |
| C  | 4.53616700  | -0.37013600 | -0.23789300 |
| C  | 4.17692000  | 1.60801000  | 1.12415000  |
| C  | 5.91299000  | -0.16401200 | -0.13191900 |
| H  | 4.14878400  | -1.21481300 | -0.79852900 |
| C  | 5.55436100  | 1.79884200  | 1.21922600  |
| H  | 3.49914100  | 2.30162200  | 1.61771100  |
| C  | 6.43394200  | 0.91313600  | 0.59048800  |
| H  | 6.58335800  | -0.86216300 | -0.62488800 |
| H  | 5.93736500  | 2.64191900  | 1.78696600  |

|   |             |             |            |
|---|-------------|-------------|------------|
| H | 7.50699600  | 1.05976700  | 0.66380200 |
| C | -3.10738900 | -0.64743200 | 1.08942100 |
| H | -3.11280500 | 0.13205800  | 1.86721500 |
| C | -2.37925100 | -1.88211700 | 1.64503600 |
| H | -2.29896500 | -2.66366900 | 0.88078600 |
| H | -1.37000600 | -1.63697400 | 1.98634600 |
| H | -2.91991900 | -2.29716400 | 2.50038000 |
| C | -4.57059900 | -0.97529600 | 0.71824300 |
| H | -5.00038800 | -0.14321200 | 0.15309700 |
| H | -4.57216800 | -1.83596300 | 0.03510500 |
| C | -5.47058900 | -1.27460100 | 1.92497500 |
| H | -6.50231700 | -1.44866700 | 1.60047500 |
| H | -5.14982600 | -2.16340600 | 2.47771500 |
| H | -5.48277200 | -0.43233000 | 2.62818400 |

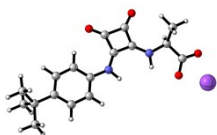

**06**

|    |             |             |             |
|----|-------------|-------------|-------------|
| C  | 0.48908100  | 2.42981700  | -0.23130900 |
| C  | 2.01984300  | 2.47619600  | -0.20187300 |
| O  | -0.40491400 | 3.24600600  | -0.36764200 |
| O  | 2.88501200  | 3.32821800  | -0.29254200 |
| C  | 0.59970200  | 0.95775100  | -0.03062800 |
| C  | 2.00554700  | 1.00512800  | -0.00839700 |
| N  | -0.21734500 | -0.11970400 | 0.10517100  |
| H  | 0.24848100  | -1.00401200 | 0.26462300  |
| N  | 2.95504600  | 0.07481500  | 0.13125400  |
| H  | 2.73836200  | -0.91856600 | 0.14867000  |
| C  | 4.39803900  | 0.33447700  | 0.08092100  |
| H  | 4.62766700  | 0.95263100  | -0.79439900 |
| C  | 5.11015200  | -1.01363900 | -0.11377600 |
| O  | 4.41266900  | -2.08279600 | -0.07083100 |
| O  | 6.36019300  | -0.99460900 | -0.29842500 |
| Na | 6.30050600  | -3.19450700 | -0.44460000 |
| C  | -1.62625100 | -0.21241200 | 0.07469200  |
| C  | -2.46426500 | 0.89233100  | -0.12946800 |
| C  | -2.20191800 | -1.47591800 | 0.25631000  |
| C  | -3.84515200 | 0.70787000  | -0.14607100 |
| H  | -2.04492500 | 1.88345800  | -0.27005100 |
| C  | -3.58845100 | -1.63555400 | 0.23541700  |
| H  | -1.56722200 | -2.34551400 | 0.41637000  |
| C  | -4.45101400 | -0.54881500 | 0.03361200  |
| H  | -4.46274800 | 1.58670500  | -0.30609100 |

|   |             |             |             |
|---|-------------|-------------|-------------|
| H | -3.98534600 | -2.63360300 | 0.38122200  |
| C | 4.91459900  | 1.05544000  | 1.33683300  |
| H | 4.44706400  | 2.03964100  | 1.41669200  |
| H | 4.68710200  | 0.47383300  | 2.23669100  |
| H | 5.99691000  | 1.18607200  | 1.26136100  |
| C | -5.98430900 | -0.68320400 | 0.00423100  |
| C | -6.44805400 | -2.13699500 | 0.22118900  |
| H | -7.54200800 | -2.18153000 | 0.19245100  |
| H | -6.07079400 | -2.80693300 | -0.55930900 |
| H | -6.12833300 | -2.52698700 | 1.19380700  |
| C | -6.60247600 | 0.19075800  | 1.12304900  |
| H | -6.34617800 | 1.24758400  | 1.00185700  |
| H | -7.69580600 | 0.10885400  | 1.11033500  |
| H | -6.24798000 | -0.12801600 | 2.10928000  |
| C | -6.51981100 | -0.20743800 | -1.36858600 |
| H | -7.61249800 | -0.29221100 | -1.40158600 |
| H | -6.26056300 | 0.83706700  | -1.56619800 |
| H | -6.10590700 | -0.81399100 | -2.18146300 |

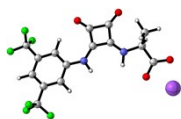

**07**

|    |             |             |             |
|----|-------------|-------------|-------------|
| C  | 0.86543000  | 2.50869700  | -0.02457400 |
| C  | 2.39779500  | 2.58899400  | 0.00515500  |
| O  | -0.05084700 | 3.30773500  | -0.08790300 |
| O  | 3.24269300  | 3.46045900  | -0.01544300 |
| C  | 1.01368900  | 1.03267200  | 0.04770800  |
| C  | 2.41648200  | 1.09987700  | 0.07356100  |
| N  | 0.21068600  | -0.07224300 | 0.09072800  |
| H  | 0.69104100  | -0.95919200 | 0.17197600  |
| N  | 3.38472300  | 0.18584500  | 0.12963400  |
| H  | 3.19318300  | -0.81225700 | 0.07125700  |
| C  | 4.82467800  | 0.47494600  | 0.10418900  |
| H  | 5.04288200  | 1.16566400  | -0.71783900 |
| C  | 5.55415200  | -0.84451200 | -0.19915400 |
| O  | 4.86759600  | -1.92072600 | -0.24271700 |
| O  | 6.80247200  | -0.79495100 | -0.38035000 |
| Na | 6.77264100  | -2.98061400 | -0.70348800 |
| C  | -1.18775400 | -0.17658000 | 0.04698600  |
| C  | -2.03569900 | 0.93420100  | -0.05513600 |
| C  | -1.73949600 | -1.46810000 | 0.10522800  |
| C  | -3.41810700 | 0.73144300  | -0.09761400 |
| H  | -1.62436600 | 1.93976400  | -0.09974900 |
| C  | -3.11886400 | -1.64218500 | 0.05966700  |

|   |             |             |             |
|---|-------------|-------------|-------------|
| H | -1.09112500 | -2.33563900 | 0.17993000  |
| C | 5.32826800  | 1.09624300  | 1.41665400  |
| H | 4.84781600  | 2.06390000  | 1.57900400  |
| H | 5.10987800  | 0.43839900  | 2.26461400  |
| H | 6.40851700  | 1.24786100  | 1.35367100  |
| C | -3.97826700 | -0.54399900 | -0.04189800 |
| H | -5.05122600 | -0.68067900 | -0.08089600 |
| C | -3.70176800 | -3.02762800 | 0.17291100  |
| C | -4.30834400 | 1.94693200  | -0.21761900 |
| F | -4.09333800 | -3.30649400 | 1.44530400  |
| F | -2.81256300 | -3.99134400 | -0.17789400 |
| F | -4.79409200 | -3.18695600 | -0.61154500 |
| F | -4.10530500 | 2.81949700  | 0.79866600  |
| F | -4.07709200 | 2.62461300  | -1.36922100 |
| F | -5.62449900 | 1.62263800  | -0.20655800 |

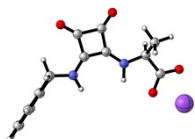

**08**

|    |             |             |             |
|----|-------------|-------------|-------------|
| C  | -0.46232900 | 2.65060700  | -0.23620200 |
| C  | 1.05912100  | 2.55975200  | -0.40189800 |
| O  | -1.34065100 | 3.48135000  | -0.40865800 |
| O  | 1.96962600  | 3.28976700  | -0.75263500 |
| C  | -0.43142000 | 1.24498600  | 0.22350200  |
| C  | 0.95981000  | 1.14642600  | 0.05453200  |
| N  | -1.39417800 | 0.38176100  | 0.60757600  |
| H  | -1.12464000 | -0.53267500 | 0.94729000  |
| N  | 1.84868700  | 0.16183000  | 0.23954800  |
| H  | 1.55633200  | -0.78554700 | 0.46178100  |
| C  | 3.28106600  | 0.26320500  | -0.05443600 |
| H  | 3.42094300  | 0.70147100  | -1.04927500 |
| C  | 3.85631100  | -1.16106600 | -0.10098100 |
| O  | 3.10042300  | -2.13574500 | 0.22980000  |
| O  | 5.06202900  | -1.29476900 | -0.45792800 |
| Na | 4.82275700  | -3.46989800 | -0.19218700 |
| C  | 4.03664800  | 1.12887000  | 0.96782400  |
| H  | 3.65978100  | 2.15375600  | 0.93283100  |
| H  | 3.90724200  | 0.73098800  | 1.98020800  |
| H  | 5.10136300  | 1.13738500  | 0.72161100  |
| C  | -2.78392200 | 0.79182200  | 0.84806600  |
| H  | -2.91840500 | 1.75442200  | 0.34620900  |
| H  | -2.94909500 | 0.95920300  | 1.92085300  |
| C  | -3.77219500 | -0.23633300 | 0.33560000  |

|   |             |             |             |
|---|-------------|-------------|-------------|
| C | -3.82115300 | -0.56004900 | -1.02942600 |
| C | -4.65904200 | -0.87268000 | 1.21216700  |
| C | -4.73832900 | -1.49783700 | -1.50395900 |
| H | -3.13850600 | -0.07047700 | -1.71880500 |
| C | -5.58142500 | -1.81273800 | 0.73942400  |
| H | -4.63328000 | -0.62808000 | 2.27155500  |
| C | -5.62210700 | -2.12765800 | -0.61972600 |
| H | -4.76943700 | -1.73377500 | -2.56390000 |
| H | -6.26407200 | -2.29576100 | 1.43274800  |
| H | -6.33773700 | -2.85583100 | -0.99046600 |

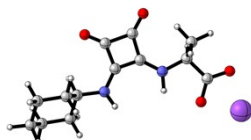

### 09

|    |             |             |             |
|----|-------------|-------------|-------------|
| C  | -0.97684700 | 2.09854900  | -0.50183000 |
| C  | 0.52695300  | 2.35548200  | -0.34962900 |
| O  | -1.98305800 | 2.75216100  | -0.72863700 |
| O  | 1.28207100  | 3.31211500  | -0.38104600 |
| C  | -0.69129100 | 0.66651600  | -0.25888600 |
| C  | 0.69045000  | 0.89241500  | -0.13919000 |
| N  | -1.46826800 | -0.43605200 | -0.22272000 |
| H  | -1.05062800 | -1.30180900 | 0.09883600  |
| N  | 1.74240300  | 0.09383200  | 0.08776200  |
| H  | 1.65142700  | -0.91801400 | 0.08672700  |
| C  | 3.13708100  | 0.54249700  | 0.12297900  |
| H  | 3.33726100  | 1.18645600  | -0.74122700 |
| C  | 4.03765500  | -0.69472700 | -0.01653900 |
| O  | 3.49382800  | -1.85027200 | -0.01288100 |
| O  | 5.28358700  | -0.50372200 | -0.11995900 |
| Na | 5.53427500  | -2.68813200 | -0.25597800 |
| C  | 3.47440500  | 1.32842800  | 1.40114400  |
| H  | 2.87311100  | 2.23970600  | 1.44211500  |
| H  | 3.27224700  | 0.72218400  | 2.29089100  |
| H  | 4.53161300  | 1.60503100  | 1.39082900  |
| C  | -2.93832800 | -0.37135800 | -0.18757200 |
| C  | -3.53286600 | -1.54550100 | -0.97885300 |
| C  | -3.47474600 | -0.34247800 | 1.25586100  |
| H  | -3.20817200 | 0.56992900  | -0.67811100 |
| C  | -5.07027800 | -1.52966300 | -0.94381700 |
| H  | -3.16946500 | -2.48997500 | -0.54291100 |
| H  | -3.16790300 | -1.51077200 | -2.01176400 |
| C  | -5.01185300 | -0.31944200 | 1.28476000  |
| H  | -3.11029400 | -1.23525600 | 1.78742800  |

|   |             |             |             |
|---|-------------|-------------|-------------|
| H | -3.06588700 | 0.53078600  | 1.77666500  |
| C | -5.60756000 | -1.49536400 | 0.49544800  |
| H | -5.46187100 | -2.40326000 | -1.47864100 |
| H | -5.43145100 | -0.64454400 | -1.48610600 |
| H | -5.36462500 | -0.33655600 | 2.32285900  |
| H | -5.36457500 | 0.62671800  | 0.85123500  |
| H | -6.70238200 | -1.43139600 | 0.48770500  |
| H | -5.35246200 | -2.43862300 | 1.00086600  |

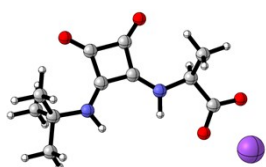

**10**

|    |             |             |             |
|----|-------------|-------------|-------------|
| C  | -1.95480400 | 1.65317800  | -0.29377800 |
| C  | -0.50313100 | 2.13486400  | -0.26103800 |
| O  | -3.05455800 | 2.16077300  | -0.44759800 |
| O  | 0.08878900  | 3.19595900  | -0.36586000 |
| C  | -1.43878000 | 0.27979800  | -0.05677700 |
| C  | -0.10331000 | 0.72475400  | -0.03578200 |
| N  | -1.97044600 | -0.95331800 | 0.08175400  |
| H  | -1.33543400 | -1.69763300 | 0.33765700  |
| N  | 1.06998100  | 0.10094200  | 0.13152200  |
| H  | 1.13653600  | -0.91270500 | 0.15680400  |
| C  | 2.37943100  | 0.75692000  | 0.07315800  |
| H  | 2.42852300  | 1.39856400  | -0.81423700 |
| C  | 3.44879500  | -0.33340400 | -0.09654000 |
| O  | 3.08830100  | -1.55732100 | -0.03759700 |
| O  | 4.64298500  | 0.04047500  | -0.27856700 |
| Na | 5.21651400  | -2.08396200 | -0.38388200 |
| C  | 2.66458400  | 1.62141400  | 1.31261900  |
| H  | 1.93461100  | 2.43217900  | 1.37166500  |
| H  | 2.60829300  | 1.01767700  | 2.22494300  |
| H  | 3.66489100  | 2.05408800  | 1.23260500  |
| C  | -3.41645000 | -1.30359100 | 0.09761400  |
| C  | -4.12693600 | -0.57933400 | 1.25728200  |
| H  | -4.09093200 | 0.50392400  | 1.11718000  |
| H  | -5.17936700 | -0.88069900 | 1.29902400  |
| H  | -3.65942200 | -0.83147400 | 2.21537600  |
| C  | -4.05673700 | -0.92549400 | -1.25067700 |
| H  | -5.10890200 | -1.23011300 | -1.26092700 |
| H  | -4.01542800 | 0.15462600  | -1.41120000 |
| H  | -3.54339200 | -1.43063900 | -2.07572400 |
| C  | -3.48032800 | -2.82522400 | 0.30438600  |
| H  | -4.52214800 | -3.15645800 | 0.31931500  |

|   |             |             |             |
|---|-------------|-------------|-------------|
| H | -2.96970800 | -3.35658200 | -0.50711100 |
| H | -3.02465100 | -3.11691800 | 1.25856700  |

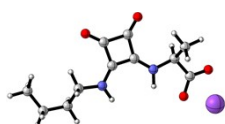

**11**

|    |             |             |             |
|----|-------------|-------------|-------------|
| C  | -1.52944400 | 1.89123500  | -0.18293800 |
| C  | -0.03733700 | 2.23054400  | -0.27419100 |
| O  | -2.59504000 | 2.46929500  | -0.32911900 |
| O  | 0.64766800  | 3.21074900  | -0.51112300 |
| C  | -1.12775900 | 0.50785800  | 0.15751700  |
| C  | 0.24124800  | 0.80740500  | 0.05572500  |
| N  | -1.82409100 | -0.61654900 | 0.41981600  |
| H  | -1.31506200 | -1.43902300 | 0.71807500  |
| N  | 1.36103500  | 0.08670500  | 0.20683700  |
| H  | 1.33334900  | -0.92201900 | 0.32392200  |
| C  | 2.71762200  | 0.60038800  | -0.00186500 |
| H  | 2.75850300  | 1.15561200  | -0.94609600 |
| C  | 3.66400800  | -0.60202800 | -0.14225700 |
| O  | 3.19710400  | -1.77403200 | 0.05702600  |
| O  | 4.86997600  | -0.36661700 | -0.44156500 |
| Na | 5.23305900  | -2.53854100 | -0.38550700 |
| C  | 3.17817300  | 1.53461300  | 1.12971500  |
| H  | 2.53408400  | 2.41642800  | 1.16385600  |
| H  | 3.13666200  | 1.01955600  | 2.09563700  |
| H  | 4.20533800  | 1.85668600  | 0.94125300  |
| C  | -3.27937300 | -0.63371200 | 0.60149400  |
| H  | -3.65618200 | 0.31518700  | 0.21497000  |
| H  | -3.52056800 | -0.66896900 | 1.67478100  |
| C  | -3.92086100 | -1.82786200 | -0.11285000 |
| H  | -3.71936600 | -1.74784900 | -1.18910300 |
| H  | -3.42998800 | -2.75076400 | 0.22973700  |
| C  | -5.43456700 | -1.94951100 | 0.13049100  |
| H  | -5.77675500 | -2.90007000 | -0.29760700 |
| H  | -5.62334200 | -2.01860500 | 1.21112600  |
| C  | -6.26456500 | -0.80387600 | -0.46463100 |
| H  | -7.33482200 | -0.97643900 | -0.30881800 |
| H  | -6.01937900 | 0.16264400  | -0.01255500 |
| H  | -6.09527100 | -0.71500100 | -1.54418700 |



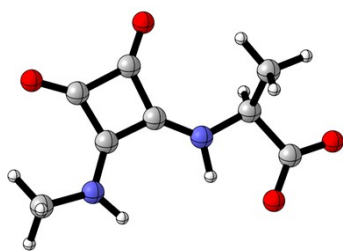

### Squaramide No cation

|   |             |             |             |
|---|-------------|-------------|-------------|
| C | -2.44902000 | 0.81632500  | -0.15463600 |
| C | -1.10015600 | 1.53556500  | -0.18231900 |
| O | -3.62971900 | 1.12689800  | -0.21188100 |
| O | -0.70984800 | 2.67916500  | -0.25840300 |
| C | -1.70981300 | -0.43600900 | -0.03869800 |
| C | -0.45050000 | 0.19168600  | -0.07301800 |
| N | -2.07382000 | -1.73764700 | 0.02314300  |
| H | -1.34844600 | -2.40327400 | 0.24236800  |
| N | 0.77343400  | -0.28393300 | -0.01991600 |
| H | 1.00292900  | -1.29157300 | -0.01891000 |
| C | 2.05315300  | 0.41875000  | -0.11560900 |
| H | 2.08416700  | 1.00442200  | -1.03812900 |
| C | 2.32043100  | 1.33732000  | 1.07320400  |
| H | 2.27212600  | 0.77221200  | 2.00789800  |
| H | 3.32426900  | 1.74957000  | 0.97384200  |
| H | 1.59620400  | 2.15325400  | 1.11383500  |
| C | 3.14638400  | -0.71564600 | -0.23340100 |
| O | 2.69837600  | -1.89302600 | -0.16268400 |
| O | 4.31015600  | -0.31976100 | -0.37696800 |
| C | -3.44025700 | -2.13103200 | 0.32324700  |
| H | -4.10916600 | -1.34050000 | -0.01140600 |
| H | -3.68778200 | -3.05578100 | -0.20189200 |
| H | -3.60465900 | -2.28522100 | 1.39666900  |

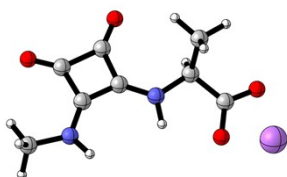

### Squaramide Li

|   |            |             |             |
|---|------------|-------------|-------------|
| C | 2.56102300 | -0.81416300 | -0.23241700 |
| C | 1.17539200 | -1.47171900 | -0.22389300 |
| O | 3.71205000 | -1.15431300 | -0.38313100 |
| O | 0.71226400 | -2.58164700 | -0.34676700 |
| C | 1.87442800 | 0.47329100  | 0.01563800  |
| C | 0.60991100 | -0.12058000 | 0.00859300  |
| N | 2.31320300 | 1.73395500  | 0.15632400  |
| H | 1.65206500 | 2.44490400  | 0.42557300  |

|    |             |             |             |
|----|-------------|-------------|-------------|
| N  | -0.63427500 | 0.34563500  | 0.16398100  |
| H  | -0.82442500 | 1.33871200  | 0.16867100  |
| C  | -1.83562800 | -0.47487100 | 0.04060600  |
| H  | -1.74434700 | -1.13301400 | -0.82719800 |
| C  | -2.09264100 | -1.34458500 | 1.27707900  |
| H  | -2.17460600 | -0.72492200 | 2.17231000  |
| H  | -3.01733400 | -1.90527900 | 1.14616200  |
| H  | -1.27143600 | -2.04868100 | 1.40290300  |
| C  | -3.02053800 | 0.44868200  | -0.22646400 |
| O  | -2.85693500 | 1.71034600  | -0.18359900 |
| O  | -4.14574800 | -0.06367000 | -0.47486900 |
| C  | 3.72826300  | 2.07309100  | 0.24073100  |
| H  | 4.31030400  | 1.22304500  | -0.10731600 |
| H  | 3.94723900  | 2.93690900  | -0.38907800 |
| H  | 4.02585100  | 2.30161800  | 1.26808700  |
| Li | -4.67670800 | 1.70299100  | -0.59818100 |

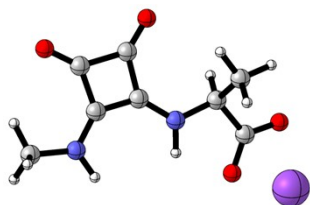

#### Squaramide Na

|   |             |             |             |
|---|-------------|-------------|-------------|
| C | 3.00122800  | -0.62123600 | -0.29584900 |
| C | 1.70166800  | -1.43490000 | -0.27611100 |
| O | 4.17975400  | -0.82208800 | -0.48789100 |
| O | 1.36762000  | -2.58706900 | -0.42568100 |
| C | 2.18029700  | 0.56755300  | 0.01383900  |
| C | 0.98975800  | -0.16508100 | 0.01632500  |
| N | 2.47382800  | 1.86801700  | 0.18492400  |
| H | 1.74415400  | 2.48141000  | 0.51148100  |
| N | -0.29084700 | 0.15459800  | 0.21484600  |
| H | -0.59349400 | 1.11906200  | 0.26657700  |
| C | -1.40686600 | -0.78106500 | 0.09775800  |
| H | -1.27631000 | -1.39580300 | -0.79575400 |
| C | -1.52641000 | -1.71112700 | 1.30976300  |
| H | -1.64350400 | -1.13170700 | 2.22812000  |
| H | -2.39144900 | -2.36178300 | 1.18773600  |
| H | -0.63235800 | -2.32844200 | 1.38909600  |
| C | -2.69528300 | 0.02952500  | -0.09801000 |
| O | -2.63714700 | 1.29307500  | 0.00569500  |
| O | -3.74882200 | -0.61046400 | -0.34285000 |
| C | 3.84334300  | 2.35775500  | 0.27674600  |
| H | 4.50941200  | 1.60597200  | -0.14017400 |
| H | 3.95017800  | 3.28339600  | -0.29109500 |

|    |             |            |             |
|----|-------------|------------|-------------|
| H  | 4.13747500  | 2.54498300 | 1.31384800  |
| Na | -4.80933000 | 1.30804000 | -0.42992400 |

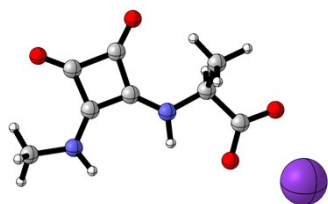

### Squaramide K

|   |             |             |             |
|---|-------------|-------------|-------------|
| C | 3.41232100  | -0.45508200 | -0.33841000 |
| C | 2.18969100  | -1.37977800 | -0.31653100 |
| O | 4.60081700  | -0.54848000 | -0.55562500 |
| O | 1.95640700  | -2.55354000 | -0.48779800 |
| C | 2.49814100  | 0.64871100  | 0.01279200  |
| C | 1.37389500  | -0.18320900 | 0.01747000  |
| N | 2.67949800  | 1.96739900  | 0.20873800  |
| H | 1.90645500  | 2.50194000  | 0.57231800  |
| N | 0.07700600  | 0.02367200  | 0.24414500  |
| H | -0.30806500 | 0.95817200  | 0.31903600  |
| C | -0.96799200 | -0.99057100 | 0.12163100  |
| H | -0.81520900 | -1.56402400 | -0.79563200 |
| C | -0.98439500 | -1.96407600 | 1.30370900  |
| H | -1.11882900 | -1.42380600 | 2.24358900  |
| H | -1.80424100 | -2.67088300 | 1.18164300  |
| H | -0.04663600 | -2.51755500 | 1.34225600  |
| C | -2.32105900 | -0.26690800 | -0.01731200 |
| O | -2.33833000 | 0.99367600  | 0.11511300  |
| O | -3.32581300 | -0.98216700 | -0.24715500 |
| C | 4.00383700  | 2.56692200  | 0.30798100  |
| H | 4.72425500  | 1.89468400  | -0.15232900 |
| H | 4.02270000  | 3.52365500  | -0.21641600 |
| H | 4.29927700  | 2.73038700  | 1.34902600  |
| K | -4.86981700 | 1.02620900  | -0.32410200 |

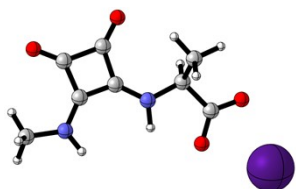

### Squaramide Cs

|   |             |             |             |
|---|-------------|-------------|-------------|
| C | -4.66377300 | 0.22610400  | -0.39825000 |
| C | -3.55046500 | 1.27991400  | -0.37391600 |
| O | -5.84836900 | 0.18201700  | -0.65100400 |
| O | -3.44179700 | 2.46657400  | -0.57761700 |
| C | -3.64628200 | -0.75904600 | 0.01379300  |

|    |             |             |             |
|----|-------------|-------------|-------------|
| C  | -2.61930800 | 0.19059800  | 0.02143800  |
| N  | -3.68768700 | -2.08388100 | 0.24763400  |
| H  | -2.87291200 | -2.51659100 | 0.65326400  |
| N  | -1.31574900 | 0.13219800  | 0.28872400  |
| H  | -0.83388900 | -0.75229500 | 0.40582100  |
| C  | -0.37918300 | 1.24713100  | 0.16329600  |
| H  | -0.56008600 | 1.77254000  | -0.77732900 |
| C  | -0.50448500 | 2.25234500  | 1.31146800  |
| H  | -0.34630600 | 1.75807600  | 2.27282600  |
| H  | 0.24182100  | 3.03665400  | 1.19063200  |
| H  | -1.49515400 | 2.70612900  | 1.30353900  |
| C  | 1.04692600  | 0.66318700  | 0.09042700  |
| O  | 1.18651700  | -0.58299000 | 0.26567300  |
| O  | 1.97776700  | 1.47320000  | -0.13299200 |
| C  | -4.94169900 | -2.82016800 | 0.33860600  |
| H  | -5.71578600 | -2.25149000 | -0.17150600 |
| H  | -4.83958400 | -3.79463800 | -0.14159600 |
| H  | -5.25147100 | -2.97066200 | 1.37756000  |
| Cs | 4.02280200  | -0.46030500 | -0.14729700 |

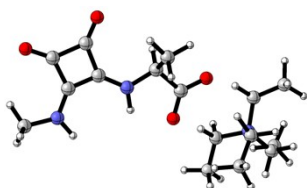

#### Squaramide tert-butylammonium

|   |             |             |             |
|---|-------------|-------------|-------------|
| C | 5.53122500  | -0.15285000 | -0.56527300 |
| C | 4.45995200  | -1.24683100 | -0.49761000 |
| O | 6.69847600  | -0.06265600 | -0.88394400 |
| O | 4.38423500  | -2.43361500 | -0.71608500 |
| C | 4.50602900  | 0.78657800  | -0.08035900 |
| C | 3.51236700  | -0.19818600 | -0.03190600 |
| N | 4.51143900  | 2.11003500  | 0.17311700  |
| H | 3.70844000  | 2.49938100  | 0.64172700  |
| N | 2.22722100  | -0.18577600 | 0.30747200  |
| H | 1.71945000  | 0.67971800  | 0.46573300  |
| C | 1.30987100  | -1.32068500 | 0.21803300  |
| H | 1.44284500  | -1.82229000 | -0.74333500 |
| C | 1.53190000  | -2.34224300 | 1.33541000  |
| H | 1.42190800  | -1.86893300 | 2.31407400  |
| H | 0.79596900  | -3.14057100 | 1.24653400  |
| H | 2.53011300  | -2.77351500 | 1.25959700  |
| C | -0.13480800 | -0.76050200 | 0.24777600  |
| O | -0.27441700 | 0.47549600  | 0.44998500  |

|   |             |             |             |
|---|-------------|-------------|-------------|
| O | -1.05130400 | -1.59640900 | 0.07237100  |
| C | 5.74536300  | 2.88236300  | 0.22934800  |
| H | 6.50696300  | 2.36188100  | -0.34690100 |
| H | 5.58653500  | 3.87255600  | -0.20073900 |
| H | 6.10932900  | 2.99901400  | 1.25535000  |
| C | -3.95041400 | -1.11267400 | -0.91146900 |
| H | -4.23544100 | -0.85419700 | -1.92866900 |
| H | -2.88924400 | -1.36965600 | -0.88715300 |
| C | -3.56556000 | -0.13970000 | 1.31388600  |
| H | -4.34617600 | -0.76844500 | 1.73749900  |
| H | -2.66073100 | -0.73248000 | 1.16645400  |
| N | -4.04366900 | 0.18891700  | -0.10609500 |
| C | -5.45771700 | 0.71405500  | -0.05723400 |
| H | -5.42005200 | 1.65436100  | 0.48611600  |
| H | -6.02555400 | 0.01352500  | 0.55233500  |
| C | -3.07368000 | 1.16139300  | -0.79768400 |
| H | -2.07686100 | 0.86548400  | -0.45633200 |
| H | -3.15138200 | 0.94328900  | -1.86108700 |
| C | -4.78709000 | -2.27415600 | -0.40538600 |
| H | -5.85585000 | -2.05870200 | -0.35890800 |
| H | -4.65337000 | -3.09446300 | -1.11233300 |
| H | -4.45397300 | -2.63768100 | 0.56466800  |
| C | -6.13695000 | 0.90482100  | -1.40455700 |
| H | -7.09762800 | 1.39275300  | -1.23327800 |
| H | -5.56377000 | 1.53912800  | -2.07932700 |
| H | -6.33692800 | -0.04025800 | -1.90719900 |
| C | -3.29428400 | 2.64940900  | -0.57508500 |
| H | -4.23183600 | 3.02045100  | -0.98955900 |
| H | -3.23188700 | 2.94652900  | 0.46786400  |
| H | -2.48511000 | 3.16031800  | -1.09991900 |
| C | -3.27453200 | 1.02788800  | 2.23801100  |
| H | -2.37696600 | 1.56172600  | 1.93409300  |
| H | -4.10765700 | 1.72254100  | 2.35482600  |
| H | -3.07202500 | 0.60167900  | 3.22238300  |

## References

1. Luchini, G.; Patterson, T.; Paton, R. S. DBSTEP: DFT Based Steric Parameters. 2022, DOI: 10.5281/zenodo.4702097
2. Reference: Tian Lu, Feiwu Chen, Multiwfn: A Multifunctional Wavefunction Analyzer, *J. Comput. Chem.* 33, 580-592 (2012) DOI: 10.1002/jcc.22885.
3. Frisch, M. J.; Trucks, G. W.; Schlegel, H. B.; Scuseria, G. E.; Robb, M. A.; Cheeseman, J. R.; Scalmani, G.; Barone, V.; Petersson, G. A.; Nakatsuji, H.; Li, X.; Caricato, M.; Marenich, A. V.; Bloino, J.; Janesko, B. G.; Gomperts, R.; Mennucci, B.; Hratchian, H. P.; Ortiz, J. V.; Izmaylov, A. F.; Sonnenberg, J. L.; Williams; Ding, F.; Lipparini, F.; Egidi, F.; Goings, J.; Peng, B.; Petrone, A.; Henderson, T.; Ranasinghe, D.; Zakrzewski, V. G.; Gao, J.; Rega, N.; Zheng, G.; Liang, W.; Hada, M.; Ehara, M.; Toyota, K.; Fukuda, R.; Hasegawa, J.; Ishida, M.; Nakajima, T.; Honda, Y.; Kitao, O.; Nakai, H.; Vreven, T.; Throssell,

K.; Montgomery Jr., J. A.; Peralta, J. E.; Ogliaro, F.; Bearpark, M. J.; Heyd, J. J.; Brothers, E. N.; Kudin, K. N.; Staroverov, V. N.; Keith, T. A.; Kobayashi, R.; Normand, J.; Raghavachari, K.; Rendell, A. P.; Burant, J. C.; Iyengar, S. S.; Tomasi, J.; Cossi, M.; Millam, J. M.; Klene, M.; Adamo, C.; Cammi, R.; Ochterski, J. W.; Martin, R. L.; Morokuma, K.; Farkas, O.; Foresman, J. B.; Fox, D. J. Gaussian 16 Rev. A.03, Wallingford, CT, 2016

4. CYLview, b. L., C. Y., Université de Sherbrooke, 2009 (<http://www.cylview.org>).

5. Lee, C.; Yang, W.; Parr, R. G., Development of the Colle-Salvetti correlation-energy formula into a functional of the electron density. *Physical Review B* 1988, 37 (2), 785-789.
